# Supplementary material for: Transcriptome analysis revealed gene regulatory network involved in PEG-induced drought stress in Tartary buckwheat (Fagopyrum Tararicum)
Source: PeerJ. 2021 Mar 31;9:e11136. doi: 10.7717/peerj.11136 (PMC8019315; doi:10.7717/peerj.11136)
Supplement: Supplemental Information 5 [file peerj-09-11136-s005.xlsx]

## Sheet: Sheet1
Treatment	Name	Root length（cm)
0%PEG	0	3.362
0%PEG	0	7.917
0%PEG	0	5.183
0%PEG	0	8.664
0%PEG	0	7.809
0%PEG	0	7.15
0%PEG	0	7.474
0%PEG	0	7.311
0%PEG	0	7.581
0%PEG	0	4.884
0%PEG	0	6.239
0%PEG	0	6.168
0%PEG	0	4.747
0%PEG	0	7.676
0%PEG	0	6.054
0%PEG	0	6.318
0%PEG	0	8.397
0%PEG	0	9.993
0%PEG	0	6.588
0%PEG	0	7.899
0%PEG	0	6.211
0%PEG	0	8.331
0%PEG	0	8.403
0%PEG	0	6.687
0%PEG	0	4.476
10%PEG	10	4.762
10%PEG	10	3.303
10%PEG	10	8.381
10%PEG	10	10.065
10%PEG	10	9.954
10%PEG	10	5.459
10%PEG	10	4.389
10%PEG	10	1.826
10%PEG	10	5.255
10%PEG	10	7.004
10%PEG	10	5.908
10%PEG	10	6.223
10%PEG	10	6.916
10%PEG	10	6.6
10%PEG	10	7.601
10%PEG	10	7.325
10%PEG	10	8.153
10%PEG	10	7.874
10%PEG	10	6.247
10%PEG	10	7.667
10%PEG	10	5.071
10%PEG	10	4.416
10%PEG	10	4.611
10%PEG	10	4.276
10%PEG	10	8.194
20%PEG	20	4.14
20%PEG	20	1.177
20%PEG	20	1.115
20%PEG	20	0.701
20%PEG	20	2.945
20%PEG	20	5.876
20%PEG	20	1.768
20%PEG	20	1.513
20%PEG	20	2.005
20%PEG	20	2.647
20%PEG	20	3.306
20%PEG	20	1.987
20%PEG	20	1.642
20%PEG	20	1.801
20%PEG	20	3.039
20%PEG	20	3.879
20%PEG	20	3.883
20%PEG	20	1.711
20%PEG	20	0.972
20%PEG	20	4.117
20%PEG	20	4.846
30%PEG	30	1.211
30%PEG	30	1.43
30%PEG	30	0.51
30%PEG	30	0.609
30%PEG	30	0.901
30%PEG	30	1.441
30%PEG	30	0.436
30%PEG	30	0.261
30%PEG	30	0.254
30%PEG	30	0.078
30%PEG	30	0.212
30%PEG	30	0.046
30%PEG	30	0.363
30%PEG	30	0.672
30%PEG	30	0.601
30%PEG	30	0.11
30%PEG	30	0.054
30%PEG	30	0.138
30%PEG	30	0.135
30%PEG	30	0.204
30%PEG	30	0.133
30%PEG	30	0.353
30%PEG	30	0.078
30%PEG	30	0.102
30%PEG	30	0.401
30%PEG	30	0.261
30%PEG	30	0.123
30%PEG	30	0.122
30%PEG	30	0.348
30%PEG	30	0.097
30%PEG	30	0.123

## Sheet: Analyses by SPSS
描述
length（cm)
		个案数	平均值	标准差	标准误差	平均值的 95% 置信区间		最小值	最大值	成分间方差			PEG concentration	Root length (cm)	SD
						下限	上限
0		25	6.86088	1.53241	0.306482	6.22833	7.49343	3.362	9.993				0	6.86088	1.53241	a
10		25	6.2992	1.99916	0.399833	5.47399	7.12441	1.826	10.065				0.1	6.2992	1.99916	a
20		21	2.62238	1.41369	0.308492	1.97888	3.26588	0.701	5.876				0.2	2.62238	1.41369	b
30		31	0.380871	0.38779	0.0696492	0.238628	0.523114	0.046	1.441				0.3	0.380871	0.38779	c
总计		102	3.88117	3.11176	0.30811	3.26996	4.49237	0.046	10.065
模型	固定效应			1.41695	0.140299	3.60275	4.15959
	随机效应				1.61855	-1.26978	9.03211			10.2001
Root length（cm)
V7		个案数	Alpha 的子集 = 0.05
			1	2	3
S-N-Ka,b	30	31	0.380871
	20	21		2.62238
	10	25			6.2992
	0	25			6.86088
	显著性		1	1	0.164068
将显示齐性子集中各个组的平均值。
a. 使用调和平均值样本大小 = 25.019。
b. 组大小不相等。使用了组大小的调和平均值。无法保证 I 类误差级别。
多重比较
因变量:	length（cm)
(I) V7			平均值差值 (I-J)	标准误差	显著性	95% 置信区间
						下限	上限
LSD	0	10	0.56168	0.400775	0.164228	-0.233645	1.357
		20	4.238499048000000*	0.419426	7.14476e-17	3.40616	5.07084
		30	6.480009032000001*	0.380889	5.19187e-31	5.72415	7.23587
	10	0	-0.56168	0.400775	0.164228	-1.357	0.233645
		20	3.676819048000000*	0.419426	5.72817e-14	2.84448	4.50916
		30	5.918329032000000*	0.380889	3.47089e-28	5.16247	6.67419
	20	0	-4.238499048000000*	0.419426	7.14476e-17	-5.07084	-3.40616
		10	-3.676819048000000*	0.419426	5.72817e-14	-4.50916	-2.84448
		30	2.241509985000000*	0.400467	1.98327e-07	1.4468	3.03622
	30	0	-6.480009032000001*	0.380889	5.19187e-31	-7.23587	-5.72415
		10	-5.918329032000000*	0.380889	3.47089e-28	-6.67419	-5.16247
		20	-2.241509985000000*	0.400467	1.98327e-07	-3.03622	-1.4468
*. 平均值差值的显著性水平为 0.05。
