# Supplementary material for: Transcriptome analysis revealed gene regulatory network involved in PEG-induced drought stress in Tartary buckwheat (Fagopyrum Tararicum)
Source: PeerJ. 2021 Mar 31;9:e11136. doi: 10.7717/peerj.11136 (PMC8019315; doi:10.7717/peerj.11136)
Supplement: Supplemental Information 6 [file peerj-09-11136-s006.xlsx]

## Sheet: H2O2
H2O2	Mean	SD
0h	255.019	63.5564
1h	354.699	78.3259
3h	395.778	53.4411
6h	394.035	48.5281

## Sheet: CAT
CAT	Mean	SD
0h	235.433	12.6535
1h	199.691	6.24353
3h	194.813	6.24668
6h	187.551	7.95233

## Sheet: MDA
MDA	Mean	SD
0h	7.53291	0.233336
1h	8.74148	0.149644
3h	8.10055	0.452557
6h	8.26095	0.267379

## Sheet: SOD
SOD	Mean	SD
0h	881.352	52.1518
1h	410.506	24.7965
3h	478.211	48.8859
6h	480.325	17.271

## Sheet: POD
POD	Mean	SD
0h	33331.2	795.589
1h	17817.9	784.745
3h	28429.6	1042.29
6h	27288.8	1660.83

## Sheet: ABA
ABA	Mean	SD
0h	0.0682023	0.0068413
1h	0.0997672	0.0276615
3h	0.15587	0.0138836
6h	0.111242	0.0076262

## Sheet: raw data and ANOVA
Treamtment time/h	H2O2	CAT	SOD	POD	MDA	ABA
0	298.483	243.087	936.127	32296	7.7667	0.070508
0	203.844	256.594	929.615	32656.7	7.64067	0.067434
0	327.588	231.362	889.419	33187.4	7.27444	0.075331
0	298.253	221.843	896.432	34023.8	7.20515	0.061404
0	164.152	225.937	815.454	34393.3	7.62537	0.059227
0	237.791	233.774	821.066	33429.8	7.68515	0.07531
1	301.388	199.624	381.119	18426.5	8.79896	0.082886
1	431.278	204.871	406.04	17555.9	8.63399	0.085723
1	384.354	194.27	388.46	16411.6	8.98995	0.079981
1	451.576	199.435	412.387	18421.8	8.79111	0.079469
1	264.25	191.654	426.512	17734.5	8.58479	0.132198
1	295.347	208.294	448.519	18357.1	8.65005	0.138346
3	387.208	189.134	536.209	28403.1	7.78134	0.141325
3	300.171	205.577	533.288	28800.3	7.5893	0.156511
3	422.816	191.145	442.513	28763.2	7.76761	0.172006
3	393.447	197.584	491.336	26858.7	8.2326	0.171468
3	459.716	195.64	435.23	27800.1	8.63386	0.140277
3	411.307	189.796	430.693	29952.3	8.59861	0.153636
6	397.916	181.161	449.897	28523.1	8.31469	0.114555
6	469.418	197.978	497.318	27211.6	8.73705	0.118459
6	367.951	184.225	489.743	24384.8	7.99635	0.103278
6	430.133	191.125	472.542	28752.2	8.30682	0.111902
6	342.029	177.235	491.605	28338	8.04462	0.100722
6	356.763	193.583	480.842	26523	8.16617	0.118536
Descriptives
		N	Mean	Std. Deviation	Std. Error	95% Confidence Interval for Mean		Minimum	Maximum
						Lower Bound	Upper Bound
H2O2	0	6	255.019	63.5564	25.9468	188.32	321.717	164.152	327.588
	1	6	354.699	78.3259	31.9764	272.501	436.897	264.25	451.576
	3	6	395.778	53.4411	21.8172	339.695	451.861	300.171	459.716
	6	6	394.035	48.5281	19.8115	343.108	444.962	342.029	469.418
	Total	24	349.883	82.1968	16.7784	315.174	384.591	164.152	469.418
CAT	0	6	235.433	12.6535	5.16576	222.154	248.712	221.843	256.594
	1	6	199.691	6.24353	2.54891	193.139	206.243	191.654	208.294
	3	6	194.813	6.24668	2.5502	188.257	201.368	189.134	205.577
	6	6	187.551	7.95233	3.24653	179.206	195.897	177.235	197.978
	Total	24	204.372	20.5075	4.18608	195.712	213.032	177.235	256.594
SOD	0	6	881.352	52.1518	21.2909	826.622	936.082	815.454	936.127
	1	6	410.506	24.7965	10.1231	384.484	436.529	381.119	448.519
	3	6	478.211	48.8859	19.9576	426.909	529.514	430.693	536.209
	6	6	480.325	17.271	7.05087	462.2	498.45	449.897	497.318
	Total	24	562.599	193.579	39.5141	480.858	644.34	381.119	936.127
POD	0	6	33331.2	795.589	324.798	32496.3	34166.1	32296	34393.3
	1	6	17817.9	784.745	320.371	16994.4	18641.4	16411.6	18426.5
	3	6	28429.6	1042.29	425.514	27335.8	29523.4	26858.7	29952.3
	6	6	27288.8	1660.83	678.03	25545.8	29031.7	24384.8	28752.2
	Total	24	26716.9	5833.47	1190.75	24253.6	29180.1	16411.6	34393.3
MDA	0	6	7.53291	0.233336	0.0952588	7.28804	7.77778	7.20515	7.7667
	1	6	8.74148	0.149644	0.061092	8.58443	8.89852	8.58479	8.98995
	3	6	8.10055	0.452557	0.184756	7.62562	8.57548	7.5893	8.63386
	6	6	8.26095	0.267379	0.109157	7.98035	8.54155	7.99635	8.73705
	Total	24	8.15897	0.520707	0.106289	7.9391	8.37885	7.20515	8.98995
ABA	0	6	0.0682023	0.0068413	0.00279295	0.0610228	0.0753818	0.059227	0.075331
	1	6	0.0997672	0.0276615	0.0112928	0.0707382	0.128796	0.079469	0.138346
	3	6	0.15587	0.0138836	0.00566795	0.141301	0.17044	0.140277	0.172006
	6	6	0.111242	0.0076262	0.00311338	0.103239	0.119245	0.100722	0.118536
	Total	24	0.10877	0.0355225	0.007251	0.0937707	0.12377	0.059227	0.172006
ANOVA
		Sum of Squares	df	Mean Square	F	Sig.
H2O2	Between Groups	78468.9	3	26156.3	6.80034	0.00242368
	Within Groups	76926.4	20	3846.32
	Total	155395	23
CAT	Between Groups	8166.08	3	2722.03	36.1308	2.88375e-08
	Within Groups	1506.76	20	75.3382
	Total	9672.84	23
SOD	Between Groups	831757	3	277252	184.135	9.87349e-15
	Within Groups	30114	20	1505.7
	Total	861871	23
POD	Between Groups	7.57207e+08	3	2.52402e+08	198.215	4.85009e-15
	Within Groups	2.54675e+07	20	1.27338e+06
	Total	7.82675e+08	23
MDA	Between Groups	4.47043	3	1.49014	16.8789	1.05571e-05
	Within Groups	1.76569	20	0.0882847
	Total	6.23613	23
ABA	Between Groups	0.0237081	3	0.00790271	29.7408	1.43167e-07
	Within Groups	0.00531439	20	0.000265719
	Total	0.0290225	23
H2O2
Student-Newman-Keuls
Treamtment time/h	N	Subset for alpha = 0.05
		1	2
0	6	255.019
1	6		354.699
6	6		394.035
3	6		395.778
Sig.		1	0.497271
Means for groups in homogeneous subsets are displayed.
a. Uses Harmonic Mean Sample Size = 6.000.
CAT
Student-Newman-Keuls
Treamtment time/h	N	Subset for alpha = 0.05
		1	2
6	6	187.551
3	6	194.813
1	6	199.691
0	6		235.433
Sig.		0.0620596	1
Means for groups in homogeneous subsets are displayed.
a. Uses Harmonic Mean Sample Size = 6.000.
MDA
Student-Newman-Keuls
Treamtment time/h	N	Subset for alpha = 0.05
		1	2	3
0	6	7.53291
3	6		8.10055
6	6		8.26095
1	6			8.74148
Sig.		1	0.360936	1
Means for groups in homogeneous subsets are displayed.
a. Uses Harmonic Mean Sample Size = 6.000.
SOD
Student-Newman-Keuls
Treamtment time/h	N	Subset for alpha = 0.05
		1	2	3
1	6	410.506
3	6		478.211
6	6		480.325
0	6			881.352
Sig.		1	0.925787	1
Means for groups in homogeneous subsets are displayed.
a. Uses Harmonic Mean Sample Size = 6.000.
POD
Student-Newman-Keuls
Treamtment time/h	N	Subset for alpha = 0.05
		1	2	3
1	6	17817.9
6	6		27288.8
3	6		28429.6
0	6			33331.2
Sig.		1	0.0952519	1
Means for groups in homogeneous subsets are displayed.
a. Uses Harmonic Mean Sample Size = 6.000.
ABA
Student-Newman-Keuls
Treamtment time/h	N	Subset for alpha = 0.05
		1	2	3
0	6	0.0682023
1	6		0.0997672
6	6		0.111242
3	6			0.15587
Sig.		1	0.236932	1
Means for groups in homogeneous subsets are displayed.
a. Uses Harmonic Mean Sample Size = 6.000.
