# Supplementary material for: Transcriptome analysis revealed gene regulatory network involved in PEG-induced drought stress in Tartary buckwheat (Fagopyrum Tararicum)
Source: PeerJ. 2021 Mar 31;9:e11136. doi: 10.7717/peerj.11136 (PMC8019315; doi:10.7717/peerj.11136)
Supplement: Supplemental Information 7 [file peerj-09-11136-s007.xlsx]

## Sheet: ABA content
Treamtment time/h	ABA
0	0.070508
0	0.067434
0	0.075331
0	0.061404
0	0.059227
0	0.07531
1	0.082886
1	0.085723
1	0.079981
1	0.079469
1	0.132198
1	0.138346
3	0.141325
3	0.156511
3	0.172006
3	0.171468
3	0.140277
3	0.153636
6	0.114555
6	0.118459
6	0.103278
6	0.111902
6	0.100722
6	0.118536
ABA
	Mean	SD
PEG0h	0.0682023	0.0068413
PEG1h	0.0997672	0.0276615
PEG3h	0.15587	0.0138836
PEG6h	0.111242	0.0076262
