# Supplementary material for: Transcriptome analysis revealed gene regulatory network involved in PEG-induced drought stress in Tartary buckwheat (Fagopyrum Tararicum)
Source: PeerJ. 2021 Mar 31;9:e11136. doi: 10.7717/peerj.11136 (PMC8019315; doi:10.7717/peerj.11136)
Supplement: Supplemental Information 8 [file peerj-09-11136-s008.xlsx]

## Sheet: LEA1
Well	Sample Name	ACTIN	LEA1	ΔCt	ΔΔCt	2^(-ΔΔCt)		Data						Plot
A1	0H-1	26.4661	28.9496	2.48352	-0.0462665	1.03259			qPCR	FPKM	log2(FPKM)				mean	mean	sd	sd
B1	0H-1	26.6073	28.9509	2.34367	-0.186114	1.1377		0H-1	1.00717	39.7761	5.31383				qRT-PCR	log2(FPKM)	qRT-PCR	log2(FPKM)	Pearson R
C1	0H-1	26.7397	29.5019	2.76217	0.232381	0.851229		0H-2	1.1366	94.2556	6.55851			PEG-0h	0.878448	5.65377	0.271615	0.646297	0.979516
A2	0H-2	25.416	27.9638	2.54783	0.0180425	0.987572		0H-3	0.491577	34.0357	5.08898			PEG-1h	30.7115	10.6132	8.02016	1.88054
B2	0H-2	25.3872	27.384	1.99684	-0.532948	1.44688		1H-1	41.0774	5925.09	12.5326			PEG-3h	29.0045	10.7003	5.4522	1.43117
C2	0H-2	25.305	27.8708	2.56582	0.0360304	0.975335		1H-2	25.6091	2431.59	11.2477			PEG-6h	34.2232	10.3479	6.46228	1.21486
A3	0H-3	24.8025	28.377	3.57451	1.04472	0.48474		1H-3	25.4479	266.739	8.05928
B3	0H-3	24.8459	28.3048	3.45892	0.929134	0.525173		3H-1	31.5258	424.483	8.72956
C3	0H-3	24.8377	28.4727	3.63505	1.10526	0.464817		3H-2	23.1711	2497.65	11.2864
A4	1H-1	24.9496	22.3231	-2.62656	-5.15634	35.6627		3H-3	32.3168	4344.67	12.085
B4	1H-1	25.0603	22.094	-2.96634	-5.49613	45.1337		6H-1	28.2395	774.541	9.5972
C4	1H-1	25.0065	22.129	-2.87742	-5.40721	42.4357		6H-2	40.1597	4274.52	12.0615
A5	1H-2	25.1198	23.2601	-1.85969	-4.38948	20.9587		6H-3	34.2704	668.527	9.38484
B5	1H-2	25.1998	22.8026	-2.39716	-4.92695	30.4201
C5	1H-2	25.1299	22.9902	-2.13972	-4.66951	25.4484
A6	1H-3	25.1322	23.011	-2.12111	-4.6509	25.1224
B6	1H-3	25.1637	23.0826	-2.08116	-4.61094	24.4361
C6	1H-3	25.1477	22.9341	-2.21358	-4.74337	26.7853
A7	3H-1	25.556	23.1884	-2.36753	-4.89731	29.8015
B7	3H-1	25.4489	22.9159	-2.53297	-5.06276	33.4228
C7	3H-1	25.4629	23.0221	-2.44075	-4.97054	31.3531
A8	3H-2	24.8929	23.2752	-1.61772	-4.1475	17.7224
B8	3H-2	24.8895	22.8995	-1.99002	-4.51981	22.9403
C8	3H-2	25.033	22.7122	-2.32074	-4.85053	28.8505
A9	3H-3	26.9549	24.3126	-2.6423	-5.17209	36.054
B9	3H-3	26.6133	24.0596	-2.5537	-5.08348	33.9064
C9	3H-3	26.3869	24.1623	-2.22456	-4.75435	26.9899
A10	6H-1	26.3143	24.1305	-2.18385	-4.71364	26.2389
B10	6H-1	26.4394	23.9425	-2.49681	-5.0266	32.5955
C10	6H-1	26.4208	24.2566	-2.16419	-4.69398	25.8839
A11	6H-2	25.521	22.6165	-2.90453	-5.43432	43.2406
B11	6H-2	25.6023	22.8439	-2.75841	-5.2882	39.0758
C11	6H-2	25.4967	22.7724	-2.7243	-5.25409	38.1626
A12	6H-3	26.0947	23.9432	-2.15149	-4.68128	25.657
B12	6H-3	25.9687	23.1548	-2.81384	-5.34363	40.6062
C12	6H-3	25.9966	23.3347	-2.66193	-5.19172	36.5479
				2.52979	2.52979

## Sheet: LEA2
Well	Sample Name	ACTIN	LEA2	ΔCt	ΔΔCt	2^(-ΔΔCt)		Data						Plot
A1	0H-1	26.4661	32.0521	5.58604	-0.157351	1.11524			qPCR	FPKM	log2(FPKM)				mean	mean	sd	sd
B1	0H-1	26.6073	32.1024	5.49513	-0.24826	1.18777		0H-1	1.01931	54.0547	5.75635				qRT-PCR	log2(FPKM)	qRT-PCR	log2(FPKM)	Pearson R
C1	0H-1	26.7397	32.8887	6.149	0.405611	0.754916		0H-2	0.245522	47.6345	5.57394			PEG-0h	0.484519	5.37972	0.436439	0.410464	0.897124
A2	0H-2	25.416	32.4856	7.06962	1.32623	0.39881		0H-3	0.188725	28.0294	4.80887			PEG-1h	3.26063	9.39467	0.872452	1.14167
B2	0H-2	25.3872	33.6868	8.2996	2.55621	0.170022		1H-1	4.02477	1530.29	10.5796			PEG-3h	6.17753	9.59084	1.54494	1.01807
C2	0H-2	25.305	33.6242	8.31916	2.57577	0.167733		1H-2	3.10546	862.261	9.75198			PEG-6h	6.17902	9.85047	0.832042	0.703384
A3	0H-3	24.8025	32.9442	8.14171	2.39832	0.189686		1H-3	2.65167	231.109	7.85243
B3	0H-3	24.8459	33.1356	8.28974	2.54635	0.171188		3H-1	4.49388	322.567	8.33346
C3	0H-3	24.8377	32.8653	8.02758	2.28419	0.2053		3H-2	7.18353	782.59	9.61211
A4	1H-1	24.9496	28.5943	3.64473	-2.09866	4.28312		3H-3	6.85518	1816.49	10.8269
B4	1H-1	25.0603	28.4957	3.43535	-2.30805	4.95212		6H-1	7.03539	654.956	9.35525
C4	1H-1	25.0065	29.2444	4.23798	-1.50541	2.83906		6H-2	6.37375	1839.63	10.8452
A5	1H-2	25.1198	29.01	3.8902	-1.85319	3.61299		6H-3	5.12793	653.006	9.35095
B5	1H-2	25.1998	29.6467	4.44693	-1.29647	2.45626
C5	1H-2	25.1299	29.1741	4.04423	-1.69917	3.24713
A6	1H-3	25.1322	29.8877	4.7556	-0.987796	1.98315
B6	1H-3	25.1637	29.1796	4.01592	-1.72748	3.31148
C6	1H-3	25.1477	29.4795	4.33177	-1.41162	2.66037
A7	3H-1	25.556	29.1571	3.60111	-2.14228	4.41459
B7	3H-1	25.4489	29.0092	3.56032	-2.18308	4.54121
C7	3H-1	25.4629	29.0281	3.56521	-2.17818	4.52584
A8	3H-2	24.8929	27.84	2.94707	-2.79632	6.94668
B8	3H-2	24.8895	27.8503	2.96084	-2.78256	6.88071
C8	3H-2	25.033	27.8271	2.79419	-2.9492	7.7232
A9	3H-3	26.9549	29.6843	2.72937	-3.01402	8.07815
B9	3H-3	26.6133	29.3644	2.75114	-2.99225	7.95714
C9	3H-3	26.3869	29.9507	3.5638	-2.1796	4.53027
A10	6H-1	26.3143	29.2568	2.94247	-2.80093	6.96888
B10	6H-1	26.4394	29.4155	2.97614	-2.76725	6.8081
C10	6H-1	26.4208	29.2906	2.86974	-2.87365	7.32919
A11	6H-2	25.521	28.6754	3.15436	-2.58903	6.01694
B11	6H-2	25.6023	28.5834	2.98111	-2.76228	6.78467
C11	6H-2	25.4967	28.5803	3.08355	-2.65984	6.31965
A12	6H-3	26.0947	29.5712	3.47653	-2.26687	4.81277
B12	6H-3	25.9687	29.3312	3.36259	-2.38081	5.20828
C12	6H-3	25.9966	29.317	3.32042	-2.42297	5.36275
				5.74339	5.74339

## Sheet: LEA3
Well	Sample Name	ACTIN	LEA3	ΔCt	ΔΔCt	2^(-ΔΔCt)		Data						Plot
A1	0H-1	26.4661	29.3711	2.90503	0.24158	0.845818			qPCR	FPKM	log2(FPKM)				mean	mean	sd	sd
B1	0H-1	26.6073	29.2339	2.62662	-0.0368274	1.02586		0H-1	1.00805	42.8358	5.42075				qRT-PCR	log2(FPKM)	qRT-PCR	log2(FPKM)	Pearson R
C1	0H-1	26.7397	29.1984	2.45869	-0.204753	1.15249		0H-2	0.326478	16.216	4.01935			PEG-0h	0.605801	4.82867	0.279095	0.592382	0.933528
A2	0H-2	25.416	29.5371	4.12115	1.45771	0.364071		0H-3	0.482872	33.0346	5.04591			PEG-1h	9.66801	8.66572	2.71532	1.43242
B2	0H-2	25.3872	29.7377	4.35047	1.68702	0.310567		1H-1	13.3704	1131.13	10.1435			PEG-3h	6.20452	8.61969	1.47117	0.665263
C2	0H-2	25.305	29.6825	4.37754	1.71409	0.304795		1H-2	7.60542	559.005	9.12672			PEG-6h	7.38973	8.25255	2.12784	0.966081
A3	0H-3	24.8025	28.4457	3.64314	0.979691	0.507088		1H-3	8.02817	105.925	6.7269
B3	0H-3	24.8459	28.4471	3.60116	0.937717	0.522059		3H-1	5.10837	275.073	8.10367
C3	0H-3	24.8377	28.7545	3.91681	1.25336	0.419469		3H-2	5.71523	293.337	8.19642
A4	1H-1	24.9496	24.0003	-0.949273	-3.61272	12.2331		3H-3	7.78996	754.298	9.55899
B4	1H-1	25.0603	23.8389	-1.22141	-3.88486	14.7727		6H-1	6.63787	238.25	7.89633
C4	1H-1	25.0065	23.9578	-1.04865	-3.7121	13.1055		6H-2	10.1673	761.625	9.57294
A5	1H-2	25.1198	24.9224	-0.197454	-2.8609	7.26468		6H-3	5.364	156.322	7.28838
B5	1H-2	25.1998	24.8023	-0.397493	-3.06094	8.34516
C5	1H-2	25.1299	24.944	-0.185838	-2.84928	7.20643
A6	1H-3	25.1322	24.7538	-0.378378	-3.04182	8.23532
B6	1H-3	25.1637	24.7863	-0.377407	-3.04085	8.22978
C6	1H-3	25.1477	24.8815	-0.266235	-2.92968	7.61942
A7	3H-1	25.556	25.85	0.294024	-2.36942	5.16734
B7	3H-1	25.4489	25.7109	0.262056	-2.40139	5.28312
C7	3H-1	25.4629	25.841	0.378144	-2.2853	4.87466
A8	3H-2	24.8929	25.1509	0.25794	-2.40551	5.29822
B8	3H-2	24.8895	25.0069	0.117409	-2.54604	5.84028
C8	3H-2	25.033	25.1097	0.0767555	-2.58669	6.00719
A9	3H-3	26.9549	26.3022	-0.652778	-3.31622	9.96054
B9	3H-3	26.6133	26.4676	-0.145695	-2.80914	7.00867
C9	3H-3	26.3869	26.3721	-0.014779	-2.67823	6.40068
A10	6H-1	26.3143	26.302	-0.012384	-2.67583	6.39006
B10	6H-1	26.4394	26.3156	-0.123763	-2.78721	6.90293
C10	6H-1	26.4208	26.3573	-0.0635173	-2.72696	6.62061
A11	6H-2	25.521	25.0238	-0.497244	-3.16069	8.94258
B11	6H-2	25.6023	24.8267	-0.775618	-3.43906	10.8458
C11	6H-2	25.4967	24.7388	-0.757928	-3.42137	10.7136
A12	6H-3	26.0947	26.2086	0.113904	-2.54954	5.85449
B12	6H-3	25.9687	26.1038	0.135116	-2.52833	5.76903
C12	6H-3	25.9966	26.5003	0.503666	-2.15978	4.46847
				2.66345	2.66345

## Sheet: LEA4
Well	Sample Name	ACTIN	LEA4	ΔCt	ΔΔCt	2^(-ΔΔCt)		Data						Plot
A1	0H-1	26.4661	32.3768	5.91077	0.0342487	0.97654			qPCR	FPKM	log2(FPKM)				mean	mean	sd	sd
B1	0H-1	26.6073	32.4965	5.88919	0.0126618	0.991262		0H-1	1.00028	2.0398	1.02843				qRT-PCR	log2(FPKM)	qRT-PCR	log2(FPKM)	Pearson R
C1	0H-1	26.7397	32.5693	5.82961	-0.0469104	1.03305		0H-2	1.14934	11.1485	3.47878			PEG-0h	0.953554	2.16957	0.15881	1.00739	0.990086
A2	0H-2	25.416	30.5503	5.13431	-0.742219	1.67275		0H-3	0.711037	4.00419	2.00151			PEG-1h	27.5182	8.12621	6.35123	1.64313
B2	0H-2	25.3872	31.7998	6.41255	0.536021	0.68967		1H-1	36.2536	863.678	9.75435			PEG-3h	25.9086	8.33606	12.206	1.33005
C2	0H-2	25.305	31.063	5.75803	-0.118497	1.0856		1H-2	23.9046	429.943	8.748			PEG-6h	23.9298	8.29729	6.90326	1.3866
A3	0H-3	24.8025	30.9925	6.18998	0.313459	0.80471		1H-3	22.3964	58.7403	5.87628
B3	0H-3	24.8459	31.4831	6.63721	0.760681	0.590218		3H-1	9.07542	90.0418	6.49252
C3	0H-3	24.8377	31.1521	6.31447	0.437949	0.738183		3H-2	34.1205	489.252	8.93444
A4	1H-1	24.9496	25.624	0.674436	-5.20209	36.8116		3H-3	34.5297	766.017	9.58123
B4	1H-1	25.0603	25.8162	0.755915	-5.12061	34.7902		6H-1	31.6658	170.178	7.4109
C4	1H-1	25.0065	25.6673	0.660889	-5.21564	37.1589		6H-2	16.8482	1222.25	10.2553
A5	1H-2	25.1198	26.4062	1.28634	-4.59018	24.087		6H-3	23.2755	149.67	7.22564
B5	1H-2	25.1998	26.5171	1.31731	-4.55922	23.5755
C5	1H-2	25.1299	26.4184	1.28849	-4.58804	24.0512
A6	1H-3	25.1322	26.6301	1.49798	-4.37855	20.8005
B6	1H-3	25.1637	26.6429	1.47914	-4.39739	21.074
C6	1H-3	25.1477	26.3623	1.21463	-4.6619	25.3146
A7	3H-1	25.556	28.3139	2.75797	-3.11856	8.68518
B7	3H-1	25.4489	28.11	2.66108	-3.21545	9.28852
C7	3H-1	25.4629	28.1295	2.66667	-3.20985	9.25257
A8	3H-2	24.8929	25.6908	0.797918	-5.07861	33.7919
B8	3H-2	24.8895	25.8216	0.932069	-4.94446	30.7914
C8	3H-2	25.033	25.67	0.637042	-5.23948	37.7782
A9	3H-3	26.9549	27.525	0.570048	-5.30648	39.5739
B9	3H-3	26.6133	27.4394	0.826071	-5.05045	33.1389
C9	3H-3	26.3869	27.315	0.92809	-4.94843	30.8764
A10	6H-1	26.3143	27.2928	0.978457	-4.89807	29.8171
B10	6H-1	26.4394	27.3373	0.897963	-4.97856	31.528
C10	6H-1	26.4208	27.2247	0.803889	-5.07264	33.6524
A11	6H-2	25.521	27.4193	1.89832	-3.9782	15.7601
B11	6H-2	25.6023	27.3723	1.77003	-4.1065	17.2258
C11	6H-2	25.4967	27.2391	1.74241	-4.13411	17.5587
A12	6H-3	26.0947	27.91	1.81528	-4.06125	16.6939
B12	6H-3	25.9687	27.3127	1.344	-4.53253	23.1434
C12	6H-3	25.9966	26.9667	0.97015	-4.90637	29.9893
				5.87653	5.87653

## Sheet: LEA5
Well	Sample Name	ACTIN	LEA5	ΔCt	ΔΔCt	2^(-ΔΔCt)		Data						Plot
A1	0H-1	26.4661	33.0092	6.54312	0.187368	0.878207			qPCR	FPKM	log2(FPKM)				mean	mean	sd	sd
B1	0H-1	26.6073	33.0209	6.41364	0.0578812	0.960674		0H-1	1.00806	2.0398	1.02843				qRT-PCR	log2(FPKM)	qRT-PCR	log2(FPKM)	Pearson R
C1	0H-1	26.7397	32.8502	6.11051	-0.245249	1.1853		0H-2	1.0091	9.12151	3.18927			PEG-0h	0.840802	1.93473	0.282753	0.915886	0.929995
A2	0H-2	25.416	31.4402	6.02425	-0.33151	1.25833		0H-3	0.505249	3.00315	1.58647			PEG-1h	10.4751	6.61949	1.75119	0.745625
B2	0H-2	25.3872	31.6997	6.31248	-0.0432793	1.03045		1H-1	11.25	160.871	7.32976			PEG-3h	7.2579	6.49707	2.30509	1.51942
C2	0H-2	25.305	32.0981	6.79307	0.437318	0.738506		1H-2	11.8958	122.728	6.93932			PEG-6h	10.0001	5.93984	1.55601	1.59509
A3	0H-3	24.8025	32.1393	7.3368	0.981043	0.506613		1H-3	8.27944	48.1478	5.5894
B3	0H-3	24.8459	31.7955	6.94956	0.593803	0.662594		3H-1	4.45946	31.663	4.98473
C3	0H-3	24.8377	32.7223	7.88466	1.5289	0.346541		3H-2	7.93417	61.0227	5.93127
A4	1H-1	24.9496	27.9828	3.03323	-3.32253	10.0042		3H-3	9.38007	381.411	8.5752
B4	1H-1	25.0603	27.7432	2.68285	-3.67291	12.7543		6H-1	10.1475	21.1573	4.40308
C4	1H-1	25.0065	27.9039	2.89742	-3.45833	10.9916		6H-2	11.3487	281.763	8.13834
A5	1H-2	25.1198	28.0159	2.89608	-3.45967	11.0019		6H-3	8.50421	38.8034	5.27811
B5	1H-2	25.1998	27.9209	2.72106	-3.6347	12.4209
C5	1H-2	25.1299	27.8692	2.73932	-3.61643	12.2646
A6	1H-3	25.1322	28.4355	3.30336	-3.0524	8.29592
B6	1H-3	25.1637	28.5258	3.36209	-2.99367	7.96496
C6	1H-3	25.1477	28.4029	3.25521	-3.10055	8.57743
A7	3H-1	25.556	29.6216	4.0656	-2.29015	4.89109
B7	3H-1	25.4489	29.8467	4.39784	-1.95792	3.88501
C7	3H-1	25.4629	29.6163	4.1534	-2.20235	4.60229
A8	3H-2	24.8929	28.3014	3.40846	-2.9473	7.71305
B8	3H-2	24.8895	28.2795	3.38998	-2.96577	7.81245
C8	3H-2	25.033	28.3396	3.30665	-3.04911	8.27702
A9	3H-3	26.9549	29.7771	2.82213	-3.53363	11.5805
B9	3H-3	26.6133	29.7776	3.16432	-3.19144	9.13522
C9	3H-3	26.3869	29.8504	3.46347	-2.89229	7.42447
A10	6H-1	26.3143	29.0279	2.7136	-3.64216	12.4853
B10	6H-1	26.4394	29.5421	3.10272	-3.25304	9.53373
C10	6H-1	26.4208	29.7022	3.28135	-3.07441	8.42344
A11	6H-2	25.521	28.3887	2.86772	-3.48804	11.2203
B11	6H-2	25.6023	28.4222	2.81992	-3.53584	11.5983
C11	6H-2	25.4967	28.3635	2.86677	-3.48899	11.2277
A12	6H-3	26.0947	29.3863	3.29164	-3.06412	8.36357
B12	6H-3	25.9687	29.3211	3.35242	-3.00334	8.01853
C12	6H-3	25.9966	29.1616	3.16506	-3.1907	9.13054
				6.35576	6.35576

## Sheet: RD19
Well	Sample Name	ACTIN	RD19	ΔCt	ΔΔCt	2^(-ΔΔCt)		Data						Plot
A1	0H-1	26.4661	32.5877	6.12162	0.182503	0.881173			qPCR	FPKM	log2(FPKM)				mean	mean	sd	sd
B1	0H-1	26.6073	32.8718	6.26449	0.325377	0.79809		0H-1	1.03374	20.398	4.35036				qRT-PCR	log2(FPKM)	qRT-PCR	log2(FPKM)	Pearson R
C1	0H-1	26.7397	32.171	5.43123	-0.507881	1.42196		0H-2	1.03367	8.10801	3.01935			PEG-0h	0.906686	3.61022	0.275517	0.553539	0.934815
A2	0H-2	25.416	31.3133	5.89731	-0.0418	1.0294		0H-3	0.652649	11.0115	3.46094			PEG-1h	7.26308	6.51102	1.02727	1.45405
B2	0H-2	25.3872	31.4708	6.08362	0.144502	0.904692		1H-1	8.57327	214.16	7.74255			PEG-3h	6.0606	6.79512	1.77836	1.117
C2	0H-2	25.305	31.0214	5.71641	-0.222705	1.16692		1H-2	7.03495	159.942	7.3214			PEG-6h	5.79894	7.05358	1.85952	1.08587
A3	0H-3	24.8025	31.2287	6.42621	0.487094	0.713461		1H-3	6.18101	22.148	4.4691
B3	0H-3	24.8459	31.3891	6.5432	0.604082	0.65789		3H-1	3.84413	49.4735	5.62858
C3	0H-3	24.8377	31.5463	6.70867	0.769559	0.586597		3H-2	6.36084	87.7871	6.45594
A4	1H-1	24.9496	27.8197	2.87013	-3.06899	8.39183		3H-3	7.97683	315.356	8.30084
B4	1H-1	25.0603	27.9234	2.8631	-3.07602	8.43283		6H-1	3.96948	70.831	6.14631
C4	1H-1	25.0065	27.7926	2.78609	-3.15302	8.89516		6H-2	5.08964	382.736	8.5802
A5	1H-2	25.1198	28.2745	3.15468	-2.78443	6.88964		6H-3	8.3377	86.4762	6.43423
B5	1H-2	25.1998	28.3094	3.10956	-2.82955	7.10853
C5	1H-2	25.1299	28.2398	3.10994	-2.82918	7.10668
A6	1H-3	25.1322	28.5835	3.4514	-2.48772	5.6089
B6	1H-3	25.1637	28.4091	3.24536	-2.69375	6.46994
C6	1H-3	25.1477	28.3943	3.24664	-2.69247	6.46419
A7	3H-1	25.556	29.4626	3.90666	-2.03245	4.09099
B7	3H-1	25.4489	29.4189	3.97005	-1.96906	3.91513
C7	3H-1	25.4629	29.5838	4.12096	-1.81815	3.52628
A8	3H-2	24.8929	28.1653	3.27238	-2.66673	6.34988
B8	3H-2	24.8895	28.3901	3.5006	-2.43851	5.42081
C8	3H-2	25.033	28.1018	3.06888	-2.87023	7.31184
A9	3H-3	26.9549	29.8097	2.85476	-3.08436	8.48172
B9	3H-3	26.6133	29.5616	2.94828	-2.99084	7.94936
C9	3H-3	26.3869	29.4192	3.03234	-2.90678	7.4994
A10	6H-1	26.3143	30.297	3.98263	-1.95648	3.88115
B10	6H-1	26.4394	30.3736	3.93423	-2.00488	4.01355
C10	6H-1	26.4208	30.355	3.93416	-2.00495	4.01375
A11	6H-2	25.521	29.1981	3.67709	-2.26203	4.79665
B11	6H-2	25.6023	29.1556	3.5533	-2.38581	5.22638
C11	6H-2	25.4967	29.0447	3.54793	-2.39119	5.24588
A12	6H-3	26.0947	28.9935	2.89885	-3.04026	8.22639
B12	6H-3	25.9687	28.8723	2.90359	-3.03552	8.19942
C12	6H-3	25.9966	28.8335	2.83691	-3.1022	8.58729
				5.93911	5.93911

## Sheet: ERD1
Well	Sample Name	ACTIN	ERD1	ΔCt	ΔΔCt	2^(-ΔΔCt)		Data						Plot
A1	0H-1	26.4661	31.4504	4.98435	-0.0944937	1.06769			qPCR	FPKM	log2(FPKM)				mean	mean	sd	sd
B1	0H-1	26.6073	31.9048	5.29756	0.21871	0.859333		0H-1	1.00565	52.0149	5.70085				qRT-PCR	log2(FPKM)	qRT-PCR	log2(FPKM)	Pearson R
C1	0H-1	26.7397	31.6944	4.95463	-0.124216	1.08992		0H-2	0.424962	20.27	4.34128			PEG-0h	0.654005	5.09719	0.250113	0.56539	0.855851
A2	0H-2	25.416	31.5297	6.1137	1.03486	0.488064		0H-3	0.531406	38.0399	5.24944			PEG-1h	1.27741	6.37642	0.249211	0.616667
B2	0H-2	25.3872	31.6767	6.28951	1.21066	0.43207		1H-1	1.5575	136.741	7.0953			PEG-3h	1.47233	5.99979	0.29535	0.49731
C2	0H-2	25.305	31.879	6.57396	1.49512	0.354752		1H-2	1.24531	87.097	6.44455			PEG-6h	1.37558	6.59991	0.33899	0.126479
A3	0H-3	24.8025	30.6362	5.8337	0.754852	0.592607		1H-3	1.02941	48.1478	5.5894
B3	0H-3	24.8459	30.9276	6.08174	1.00289	0.498999		3H-1	1.07077	93.0102	6.53932
C3	0H-3	24.8377	30.909	6.07133	0.992481	0.502613		3H-2	1.66311	69.5873	6.12075
A4	1H-1	24.9496	29.6184	4.66875	-0.410098	1.32878		3H-3	1.68312	40.4849	5.33931
B4	1H-1	25.0603	29.3319	4.27152	-0.807321	1.74996		6H-1	1.75885	91.9882	6.52338
C4	1H-1	25.0065	29.4129	4.4064	-0.672441	1.59377		6H-2	1.04593	90.3948	6.49817
A5	1H-2	25.1198	29.8974	4.77755	-0.301292	1.23225		6H-3	1.32195	109.758	6.77819
B5	1H-2	25.1998	29.816	4.61615	-0.462692	1.37811
C5	1H-2	25.1299	30.0381	4.90818	-0.170663	1.12558
A6	1H-3	25.1322	30.0942	4.96206	-0.11679	1.08432
B6	1H-3	25.1637	30.148	4.98422	-0.0946255	1.06779
C6	1H-3	25.1477	30.3218	5.17407	0.095224	0.936127
A7	3H-1	25.556	30.6253	5.06932	-0.00952389	1.00662
B7	3H-1	25.4489	30.451	5.00213	-0.0767144	1.05461
C7	3H-1	25.4629	30.3387	4.87588	-0.20297	1.15107
A8	3H-2	24.8929	29.3927	4.49982	-0.579026	1.49384
B8	3H-2	24.8895	29.2018	4.31228	-0.766567	1.70122
C8	3H-2	25.033	29.2684	4.23544	-0.843401	1.79427
A9	3H-3	26.9549	31.3012	4.34628	-0.73257	1.6616
B9	3H-3	26.6133	30.9296	4.31632	-0.762521	1.69645
C9	3H-3	26.3869	30.7076	4.3207	-0.758143	1.69131
A10	6H-1	26.3143	30.3861	4.07174	-1.00711	2.00988
B10	6H-1	26.4394	30.6272	4.18783	-0.891015	1.85448
C10	6H-1	26.4208	31.0017	4.58092	-0.497927	1.41218
A11	6H-2	25.521	30.4032	4.88218	-0.196665	1.14605
B11	6H-2	25.6023	30.643	5.04067	-0.0381802	1.02682
C11	6H-2	25.4967	30.6271	5.13033	0.0514893	0.96494
A12	6H-3	26.0947	30.6375	4.54285	-0.535995	1.44994
B12	6H-3	25.9687	30.5934	4.62477	-0.454073	1.3699
C12	6H-3	25.9966	30.8788	4.88222	-0.196626	1.14602
				5.07885	5.07885

## Sheet: DREB2
Well	Sample Name	ACTIN	DREB2	ΔCt	ΔΔCt	2^(-ΔΔCt)		Data						Plot
A1	0H-1	26.4661	34.931	8.46489	0.733052	0.60163			qPCR	FPKM	log2(FPKM)				mean	mean	sd	sd
B1	0H-1	26.6073	33.9031	7.29578	-0.43606	1.3529		0H-1	1.06104	3.0597	1.61339				qRT-PCR	log2(FPKM)	qRT-PCR	log2(FPKM)	Pearson R
C1	0H-1	26.7397	34.1746	7.43485	-0.296993	1.22858		0H-2	1.98574	3.0405	1.60431			PEG-0h	1.41743	1.93473	0.282711	0.460872	0.913837
A2	0H-2	25.416	32.0818	6.66581	-1.06603	2.09366		0H-3	1.20552	6.00629	2.58647			PEG-1h	3.29648	3.36947	0.444804	0.614482
B2	0H-2	25.3872	32.2852	6.898	-0.833837	1.78242		1H-1	3.13032	12.0654	3.5928			PEG-3h	6.39778	4.42952	1.14712	0.633707
C2	0H-2	25.305	31.9795	6.67447	-1.05737	2.08114		1H-2	3.69345	15.8358	3.98512			PEG-6h	3.32392	3.78862	0.479395	0.528212
A3	0H-3	24.8025	32.4689	7.66634	-0.0654993	1.04645		1H-3	3.06567	5.77773	2.5305
B3	0H-3	24.8459	32.4697	7.62386	-0.107985	1.07772		3H-1	6.55045	25.7262	4.68517
C3	0H-3	24.8377	31.9919	7.15422	-0.577623	1.49239		3H-2	5.50004	11.7763	3.55782
A4	1H-1	24.9496	31.0544	6.10476	-1.62708	3.08887		3H-3	7.14284	33.0272	5.04558
B4	1H-1	25.0603	31.2775	6.21713	-1.51471	2.85741		6H-1	3.5348	21.1573	4.40308
C4	1H-1	25.0065	30.9539	5.94748	-1.78437	3.44467		6H-2	2.81154	8.65483	3.1135
A5	1H-2	25.1198	30.9472	5.82741	-1.90443	3.74362		6H-3	3.62542	14.4127	3.84927
B5	1H-2	25.1998	31.2175	6.01772	-1.71412	3.28096
C5	1H-2	25.1299	30.8417	5.71186	-2.01998	4.05578
A6	1H-3	25.1322	31.2652	6.13304	-1.5988	3.02892
B6	1H-3	25.1637	31.5487	6.385	-1.34685	2.54355
C6	1H-3	25.1477	31.0217	5.87405	-1.8578	3.62453
A7	3H-1	25.556	30.5533	4.99738	-2.73446	6.65512
B7	3H-1	25.4489	30.4341	4.98518	-2.74666	6.7116
C7	3H-1	25.4629	30.5429	5.08001	-2.65183	6.28464
A8	3H-2	24.8929	30.2257	5.33281	-2.39903	5.27448
B8	3H-2	24.8895	30.24	5.3505	-2.38134	5.21021
C8	3H-2	25.033	30.1761	5.14318	-2.58866	6.01541
A9	3H-3	26.9549	31.4695	4.51457	-3.21728	9.30029
B9	3H-3	26.6133	31.6715	5.05824	-2.6736	6.3802
C9	3H-3	26.3869	31.5957	5.20877	-2.52307	5.74804
A10	6H-1	26.3143	32.0891	5.77474	-1.9571	3.88281
B10	6H-1	26.4394	32.4101	5.97074	-1.7611	3.38957
C10	6H-1	26.4208	32.4163	5.99544	-1.7364	3.33203
A11	6H-2	25.521	31.9535	6.43244	-1.2994	2.46126
B11	6H-2	25.6023	31.7756	6.17332	-1.55852	2.94551
C11	6H-2	25.4967	31.6303	6.13355	-1.59829	3.02784
A12	6H-3	26.0947	31.9863	5.89164	-1.8402	3.5806
B12	6H-3	25.9687	32.0463	6.07769	-1.65416	3.14739
C12	6H-3	25.9966	31.6759	5.67933	-2.05251	4.14827
				7.73184	7.73184

## Sheet: RD22
Well	Sample Name	ACTIN	RD22	ΔCt	ΔΔCt	2^(-ΔΔCt)		Data						Plot
A1	0H-1	26.4661	27.2798	0.813681	0.0710535	0.951943			qPCR	FPKM	log2(FPKM)				mean	mean	sd	sd
B1	0H-1	26.6073	27.2647	0.657396	-0.0852322	1.06086		0H-1	1.00101	734.328	9.52028				qRT-PCR	log2(FPKM)	qRT-PCR	log2(FPKM)	Pearson R
C1	0H-1	26.7397	27.4965	0.756806	0.0141787	0.99022		0H-2	0.8045	812.828	9.66681			PEG-0h	0.775646	9.17317	0.243241	0.597497	0.987536
A2	0H-2	25.416	26.5116	1.09559	0.35296	0.782976		0H-3	0.521431	322.338	8.33243			PEG-1h	0.24748	7.54652	0.192891	0.795321
B2	0H-2	25.3872	26.2699	0.882658	0.14003	0.9075		1H-1	0.0674817	130.708	7.0302			PEG-3h	0.429097	7.8221	0.208524	0.501271
C2	0H-2	25.305	26.5155	1.21052	0.467887	0.723023		1H-2	0.160741	122.728	6.93932			PEG-6h	0.192541	7.28295	0.171139	1.56848
A3	0H-3	24.8025	26.6148	1.81224	1.06961	0.476448		1H-3	0.514217	407.33	8.67005
B3	0H-3	24.8459	26.4128	1.56695	0.824324	0.564747		3H-1	0.22511	141.494	7.1446
C3	0H-3	24.8377	26.5151	1.67747	0.934843	0.523099		3H-2	0.373023	324.384	8.34156
A4	1H-1	24.9496	29.6893	4.73971	3.99708	0.0626265		3H-3	0.689157	252.498	7.98013
B4	1H-1	25.0603	29.6112	4.55089	3.80826	0.0713838		6H-1	0.429681	528.932	9.04694
C4	1H-1	25.0065	29.6182	4.61175	3.86912	0.0684349		6H-2	0.105932	189.445	7.56563
A5	1H-2	25.1198	28.6467	3.52691	2.78428	0.14516		6H-3	0.0420087	37.6947	5.23629
B5	1H-2	25.1998	28.4063	3.20649	2.46386	0.181261
C5	1H-2	25.1299	28.5547	3.42484	2.68221	0.155802
A6	1H-3	25.1322	26.9051	1.773	1.03037	0.489585
B6	1H-3	25.1637	26.8373	1.67357	0.930939	0.524517
C6	1H-3	25.1477	26.8102	1.66252	0.91989	0.528549
A7	3H-1	25.556	28.2672	2.71118	1.96856	0.255509
B7	3H-1	25.4489	28.279	2.83011	2.08748	0.235291
C7	3H-1	25.4629	28.6436	3.18069	2.43807	0.184531
A8	3H-2	24.8929	27.2678	2.37487	1.63224	0.322587
B8	3H-2	24.8895	26.9781	2.08863	1.346	0.393381
C8	3H-2	25.033	27.0864	2.05341	1.31078	0.403102
A9	3H-3	26.9549	27.9131	0.958151	0.215523	0.861234
B9	3H-3	26.6133	27.9923	1.37905	0.636418	0.643308
C9	3H-3	26.3869	27.9585	1.5716	0.828976	0.562929
A10	6H-1	26.3143	28.4528	2.13847	1.39584	0.380024
B10	6H-1	26.4394	28.2716	1.8322	1.08958	0.469899
C10	6H-1	26.4208	28.3508	1.92994	1.18732	0.439119
A11	6H-2	25.521	29.6518	4.13082	3.38819	0.0955109
B11	6H-2	25.6023	29.5561	3.95374	3.21111	0.107984
C11	6H-2	25.4967	29.3684	3.87171	3.12908	0.114301
A12	6H-3	26.0947	31.6235	5.52878	4.78615	0.036243
B12	6H-3	25.9687	31.1556	5.18693	4.4443	0.0459337
C12	6H-3	25.9966	31.2505	5.25393	4.5113	0.0438495
				0.742628	0.742628

## Sheet: HB2
Well	Sample Name	ACTIN	HB2	ΔCt	ΔΔCt	2^(-ΔΔCt)		Data						Plot
A1	0H-1	26.4661	28.8684	2.40232	0.0483946	0.967012			qPCR	FPKM	log2(FPKM)				mean	mean	sd	sd
B1	0H-1	26.6073	29.0504	2.44311	0.0891853	0.940053		0H-1	1.00237	89.7512	6.48786				qRT-PCR	log2(FPKM)	qRT-PCR	log2(FPKM)	Pearson R
C1	0H-1	26.7397	28.9561	2.21635	-0.13758	1.10006		0H-2	0.670537	53.7155	5.74727			PEG-0h	0.863051	6.04784	0.0679157	0.318017	0.974719
A2	0H-2	25.416	28.4213	3.00529	0.651359	0.63668		0H-3	0.91624	60.0629	5.9084			PEG-1h	1.65292	6.97303	0.540452	0.328205
B2	0H-2	25.3872	28.3119	2.92465	0.570725	0.673278		1H-1	1.15337	122.664	6.93857			PEG-3h	2.1862	7.16464	1.03117	0.119676
C2	0H-2	25.305	28.1701	2.8651	0.511169	0.701654		1H-2	2.39773	167.86	7.39111			PEG-6h	0.839095	6.17358	0.219034	0.316405
A3	0H-3	24.8025	27.2926	2.49011	0.13618	0.909925		1H-3	1.40768	96.2955	6.5894
B3	0H-3	24.8459	27.3691	2.52316	0.169237	0.889313		3H-1	1.8952	141.494	7.1446
C3	0H-3	24.8377	27.2664	2.42871	0.0747851	0.949484		3H-2	1.18208	130.61	7.02912
A4	1H-1	24.9496	27.0874	2.13779	-0.216135	1.16162		3H-3	3.48131	159.809	7.3202
B4	1H-1	25.0603	27.279	2.21871	-0.135218	1.09826		6H-1	0.884306	98.4274	6.62099
C4	1H-1	25.0065	27.0971	2.09063	-0.263299	1.20022		6H-2	0.56261	61.5454	5.94358
A5	1H-2	25.1198	26.2402	1.12042	-1.23351	2.35138		6H-3	1.07037	62.0855	5.95618
B5	1H-2	25.1998	26.321	1.12118	-1.23275	2.35014
C5	1H-2	25.1299	26.1667	1.03681	-1.31711	2.49167
A6	1H-3	25.1322	26.8983	1.76619	-0.587741	1.50289
B6	1H-3	25.1637	27.1179	1.95418	-0.399752	1.31928
C6	1H-3	25.1477	27.0153	1.86762	-0.48631	1.40086
A7	3H-1	25.556	26.9126	1.3566	-0.99733	1.9963
B7	3H-1	25.4489	27.0228	1.5739	-0.780032	1.71717
C7	3H-1	25.4629	26.837	1.37417	-0.979759	1.97214
A8	3H-2	24.8929	27.0072	2.11432	-0.239612	1.18067
B8	3H-2	24.8895	27.1049	2.21538	-0.138544	1.10079
C8	3H-2	25.033	27.048	2.01505	-0.338873	1.26477
A9	3H-3	26.9549	27.1897	0.234713	-2.11921	4.34457
B9	3H-3	26.6133	27.267	0.653682	-1.70024	3.24956
C9	3H-3	26.3869	27.23	0.84307	-1.51086	2.84979
A10	6H-1	26.3143	28.9257	2.61136	0.257432	0.836575
B10	6H-1	26.4394	29.0371	2.59776	0.243834	0.844498
C10	6H-1	26.4208	28.8159	2.39513	0.0412021	0.971845
A11	6H-2	25.521	28.7827	3.26163	0.907703	0.533033
B11	6H-2	25.6023	28.6212	3.01891	0.664978	0.630698
C11	6H-2	25.4967	28.7828	3.28602	0.93209	0.524098
A12	6H-3	26.0947	28.2127	2.118	-0.235929	1.17766
B12	6H-3	25.9687	28.307	2.33832	-0.015607	1.01088
C12	6H-3	25.9966	28.3183	2.32174	-0.0321879	1.02256
				2.35393	2.35393

[truncated: 21 more sheets: HB1, DREB1D, RD29B, RD26, PSY1, PSY2, FtBCH, NCED1, NCED2, NCED3, NCED4, PYR1, PYR2, PP2C1, PP2C2, PP2C3, PP2C4, PP2C5, OST1, FtAREB1 …]
