# Supplementary material for: Transcriptome analysis revealed gene regulatory network involved in PEG-induced drought stress in Tartary buckwheat (Fagopyrum Tararicum)
Source: PeerJ. 2021 Mar 31;9:e11136. doi: 10.7717/peerj.11136 (PMC8019315; doi:10.7717/peerj.11136)
Supplement: Table S1 [file peerj-09-11136-s003.xlsx]

## Sheet: Sheet1
	Table S1. List of qRT-PCR primers
gene ID	Gene name	forward primer	reverse primer	products length (bp)	gene annotation
FtPinG0009412200.01	FtNCED1	TGCATGACTCCAGCGGATTCCA	CGGATCTCGGATCACTGCTCGT	123	AT1G30100 | NCED5, ATNCED5 , nine-cis-epoxycarotenoid dioxygenase 5
FtPinG0006853200.01	FtNCED2	CAATCACCACCACCGTCACCAC	CATGCCGTCTCCGTCGAACAAG	299	AT1G78390 | NCED9, ATNCED9 , nine-cis-epoxycarotenoid dioxygenase 9
FtPinG0003131500.01	FtNCED3	ATGCGACGAAGAACTCCGATCA	CGACCTTTGCGAACCCTGAAA	213	AT3G14440 | NCED3, ATNCED3, STO1, SIS7 , nine-cis-epoxycarotenoid dioxygenase 3
FtPinG0000246400.01	FtNCED4	CGCTTGCCGATTCACTGAGACT	TCGCTAGAAGCCGACCGTTGA	215	AT3G14440 | NCED3, ATNCED3, STO1, SIS7 , nine-cis-epoxycarotenoid dioxygenase 3
FtPinG0005737800.01	FtPSY1	TGATAGGTGTGGCGAAGTGTGT	GGTCCGTCAACAAGTTCGTCAG	138	AT5G17230 | PSY , PHYTOENE SYNTHASE
FtPinG0004637900.01	FtPSY2	GCTGGAACTGTCGGGTTGATGA	GCTAGTGCCAACTCGTCCTGTG	191	AT5G17230 | PSY , PHYTOENE SYNTHASE
FtPinG0006960700.01	FtBCH	TGGCAGTTGGATGGCGGAGA	CGGCGAACACGTCGTTCATCT	196	AT4G25700 | BETA-OHASE 1, B1, chy1, BCH1 , beta-hydroxylase 1
FtPinG0002143600.01	FtbZIP83	TGCTGGTGTTGGTGTAGGAGGA	GCTTGCGGAATACTCGGTCCAA	168	AT1G45249 | ABF2, AREB1, ATAREB1 , abscisic acid responsive elements-binding factor 2
FtPinG0003196200.01	FtbZIP5	GCAGTCGCCTGATATGGTCCTG	TCACCGCCTTGTAACCCAAAGC	243	AT1G45249 | ABF2, AREB1, ATAREB1 , abscisic acid responsive elements-binding factor 2
FtPinG0007629100.01	FtPP2C1	TGATTGCTAACTGCGGCGACTC	AGAACACGAGGTCCATGCCAGT	154	AT2G29380 | HAI3 , highly ABA-induced PP2C gene 3
FtPinG0009574600.01	FtPP2C2	GCGGAACCCAGACCATTGCTTT	CCACAGTCCATCGCTTGCCAAG	248	AT4G26080 | ABI1, AtABI1 , Protein phosphatase 2C family protein
FtPinG0004850700.01	FtPP2C3	TGACCGTCGATCACAAGCCTGA	GACACCTCCGTACCACCTGACA	273	AT2G29380 | HAI3 , highly ABA-induced PP2C gene 3
FtPinG0002889200.01	FtPP2C4	AGCCACAGGAGTAGCTCGGATG	ATCCACCACGACAACGCTAACG	196	AT2G29380 | HAI3 , highly ABA-induced PP2C gene 3
FtPinG0006346100.01	FtPP2C5	TGAGTTCGGAGCCAGAGGTGAC	CGCATCAGAGCACGCCTTGT	206	AT2G29380 | HAI3 , highly ABA-induced PP2C gene 3
FtPinG0001214600.01	FtPYR1	ACGGAGACGGACATGGCAGTT	ATGCTAGTGGTTGCTGGAAGCC	259	AT5G53160 | RCAR3, PYL8 , regulatory components of ABA receptor 3
FtPinG0007802700.01	FtPYR2	AGCAACAAGCACAGAGCGACTC	AGACTCCAACACCACCGACCAG	172	AT4G17870 | PYR1, RCAR11 , Polyketide cyclase/dehydrase and lipid transport superfamily protein
FtPinG0003981600.01	FtOST1	AGGACGAGATAGCGAGGAAGCG	GCATCCAAGTCATCAGGCTCCA	147	AT1G60940 | SNRK2-10, SNRK2.10, SRK2B , SNF1-related protein kinase 2.10
FtPinG0002124000.01	FtActin	GAGTTATGAGCTTCCTGATG	CCGCCACTCAACACAATGTT	192	Actin
FtPinG0002083100.01	LEA1	GATGGGCACAGTGAAGGACA	GCCTTGTCTTTGGCCCATTG	111	late embryogenesis abundant protein 2
FtPinG0005679700.01	LEA2	GGGAGAAGATGAGTGCCCAC	GTTCCGATGGGGTGAGACTG	283	late embryogenesis abundant protein 46-like
FtPinG0004425400.01	LEA3	CGAGGAGAAGCTTCAAGCCA	CCCAGTTCCGGTTCCAATCA	157	late embryogenesis abundant protein 6-like
FtPinG0001202200.01	LEA4	ACAGAAAGCGTCGGAGAAGG	AGCAGCTTCGTAGTTCTCCG	238	late embryogenesis abundant protein D-29
FtPinG0000702400.01	LEA5	GAACTCAAAGGGCGGGAGAA	TCTTCTTCGTCGCCCCTTTC	198	late embryogenesis abundant protein D-29-like
FtPinG0004870600.01	RD29B	GACGAGAAGGACATCGGGTC	CTTCCCATCAGCTGTGTGGT	192	RD29B
FtPinG0002173200.01	RD26	TCAAGCAACGAGTACAGCGT	ATCACGTGACCACTCTGCTG	227	RD26
FtPinG0008274300.01	DREB1D	GGATATCCAGAGGGTTGCGG	GTCAGCAACTTGGGCATGTG	171	DREB1D
FtPinG0001748800.01	HB1	AACCATGGAATTCGGCCCAT	CTACACGTGGGTTCAGCCAT	105	HB
FtPinG0008157500.01	HB2	AGCAGAGGAGAAGGAGGAGG	AACCGCAACTTGTCTCGGAT	182	HB
FtPinG0002802300.01	RD22	TTAAGGCAATGGCGGTTTGC	ACAAACCGGGGTAGTTGTCC	104	RD22
FtPinG0007618600.01	DREB2	AAGGATGCATGCCTGGGAAA	TGCTTCTCGGCCTGGATTTT	129	DREB2
FtPinG0002253700.01	RD19	AGGAGCCATAGAAGGAGCCA	ATGCGTTCGTCATCAACCCT	149	RD19
FtPinG0001990100.01	ERD1	ACAGGGACCTTGCGTATGTG	TGGTACACTGTTGCAGCACT	223	ERD1
