# Supplementary material for: Transcriptome analysis revealed gene regulatory network involved in PEG-induced drought stress in Tartary buckwheat (Fagopyrum Tararicum)
Source: PeerJ. 2021 Mar 31;9:e11136. doi: 10.7717/peerj.11136 (PMC8019315; doi:10.7717/peerj.11136)
Supplement: Table S2 [file peerj-09-11136-s004.xlsx]

## Sheet: all_diff
Appendix C. DEGs identified under drought stress
	PEG0h_1	PEG0h_2	PEG0h_3	PEG1h_1	PEG1h_2	PEG1h_3	PEG3h_1	PEG3h_2	PEG3h_3	PEG6h_1	PEG6h_2	PEG6h_3	NR annotation	TAIR annotation	Hierarchical C
FtPinG0003343100.01	18131.8	15030.2	19173.1	7656.47	18587.3	15266.7	18424.9	8892.19	10518.6	4910.33	6885.39	9551.18	AAD48017.1|chlorophyll a/b binding protein [Rumex palustris]	AT2G05100 | LHCB2.1, LHCB2 , photosystem II light harvesting complex gene 2.1	C1
FtPinG0002327100.01	13296.4	17018.7	16273	5153.92	16796.3	14808.3	21331	10488.4	14518.1	1514.13	1743.47	2831.54	ABF17940.1|putative chloroplast chlorophyll a/b-binding protein [Carya cathayensis]	AT1G29930 | CAB1, AB140, CAB140, LHCB1.3 , chlorophyll A/B binding protein 1	C1
FtPinG0004114300.01	11155.7	10951.9	10401.9	5417.34	10614.8	8147.56	5320.38	3469.73	3043.83	1049.59	1428.05	1893.61	XP_012842001.1|PREDICTED: thiamine thiazole synthase 2, chloroplastic-like [Erythranthe guttata]	AT5G54770 | THI1, TZ, THI4 , thiazole biosynthetic enzyme, chloroplast (ARA6) (THI1) (THI4)	C1
FtPinG0005836400.01	7742.06	4059.07	7981.36	3601.51	5024.71	4310.19	3230.62	2212.88	1564	2282.23	2350.27	2576.55	XP_021847594.1|cytochrome P450 94B3-like [Spinacia oleracea]	AT3G48520 | CYP94B3 , cytochrome P450, family 94, subfamily B, polypeptide 3	C1
FtPinG0007189700.01	6678.31	5259.06	8434.84	2677.5	3544.85	4253.37	200.862	1349.99	1183.65	1308.07	1028.96	2062.12	PSS34360.1|Pectinesterase inhibitor domain protein [Actinidia chinensis var. chinensis]	AT5G62360 | Plant invertase/pectin methylesterase inhibitor superfamily protein	C1
FtPinG0003140500.01	6449.85	3952.65	4560.78	10001.2	6377.88	4347.74	6345.47	3071.48	3297.39	815.016	2644.53	1258.34	AYG85508.1|UDP-glucose:flavonoid 3-O-glucosyltransferase [Fagopyrum tataricum]	AT5G17050 | UGT78D2 , UDP-glucosyl transferase 78D2	C1
FtPinG0001274500.01	4622.19	5082.71	5271.52	1611.73	5610.63	5788.32	7469.51	4440.74	5377.04	811.336	805.86	1365.88	OMP04598.1|Chlorophyll A-B binding protein, plant [Corchorus olitorius]	AT5G54270 | LHCB3, LHCB3*1 , light-harvesting chlorophyll B-binding protein 3	C1
FtPinG0002454500.01	4437.59	2966.52	3606.78	1034.6	2899.54	2728.05	1401.09	471.053	224.798	340.357	684.693	912.435	XP_021762228.1|cytosolic sulfotransferase 15-like [Chenopodium quinoa]	AT5G07010 | ATST2A, ST2A , sulfotransferase 2A	C1
FtPinG0003768400.01	4261.14	3093.2	4255.46	4099.2	4588.43	3494.56	3502.72	2968.7	2536.7	1411.1	1766.55	2525.55	BAU24783.1|CYP74B24 [Camellia sinensis]	AT4G15440 | HPL1, CYP74B2 , hydroperoxide lyase 1	C1
FtPinG0002327400.01	4186.69	6604.98	6015.3	1366.4	6803.07	3905.75	6555.24	3177.46	4593.97	1317.27	1830.98	2767.24	PRQ52087.1|Chlorophyll a-b binding protein AB10 [Rosa chinensis]	AT1G29920 | CAB2, AB165, LHCB1.1 , chlorophyll A/B-binding protein 2	C1
FtPinG0005587800.01	3927.64	2360.44	3753.93	2807.21	3172.71	3291.38	2658.71	2388.45	1745.11	1231.72	1459.78	2127.54	EOY22919.1|DC1.2-like, putative [Theobroma cacao]	AT5G62360 | Plant invertase/pectin methylesterase inhibitor superfamily protein	C1
FtPinG0002444200.01	3723.66	2312.81	2567.69	2609.13	2340.53	2494.05	2964.45	1875.65	1660.95	1436.86	1288.61	1555.46	XP_008233765.1|PREDICTED: flavonol synthase/flavanone 3-hydroxylase [Prunus mume]	AT5G05600 | 2-oxoglutarate (2OG) and Fe(II)-dependent oxygenase superfamily protein	C1
FtPinG0002952800.01	3704.28	1120.93	2361.47	2460.33	3439.54	1376.06	3351.34	2089.76	1310.43	646.677	918.373	770.525	ADO51752.1|lipoxygenase [Camellia sinensis]	AT3G45140 | LOX2, ATLOX2 , lipoxygenase 2	C1
FtPinG0002326800.01	3356.49	2121.26	3519.69	960.201	3457.75	2328.43	5188.78	2256.77	2636.85	377.152	422.163	442.359	OVA14256.1|Chlorophyll A-B binding protein [Macleaya cordata]	AT1G29930 | CAB1, AB140, CAB140, LHCB1.3 , chlorophyll A/B binding protein 1	C1
FtPinG0009494800.01	3116.82	5320.88	2957.1	6570.59	8789.67	4241.82	5714.19	1402.45	2269.29	341.276	1169.36	763.873	ADO51752.1|lipoxygenase [Camellia sinensis]	AT3G45140 | LOX2, ATLOX2 , lipoxygenase 2	C1
FtPinG0009151700.01	2988.31	1624.64	2259.37	1756.51	2923.29	1867.17	1411.97	1190.48	1166.61	470.98	768.356	746.134	PKI48184.1|hypothetical protein CRG98_031449 [Punica granatum]	AT2G47400 | CP12-1, CP12 , CP12 domain-containing protein 1	C1
FtPinG0007156400.01	2790.45	1740.18	2681.81	2229.07	2297.78	2009.69	1509.93	1142.3	942.873	544.57	683.731	798.242	XP_010685628.1|PREDICTED: alpha-glucan phosphorylase, H isozyme [Beta vulgaris subsp. vulgaris]	AT3G46970 | ATPHS2, PHS2 , alpha-glucan phosphorylase 2	C1
FtPinG0007821700.01	2762.91	1589.17	2384.5	1575.53	2098.25	1555.17	1484.21	750.473	763.887	247.448	409.662	359.209	KYP38611.1|Two-component response regulator-like PRR95 [Cajanus cajan]	AT5G24470 | APRR5, PRR5 , pseudo-response regulator 5	C1
FtPinG0007323800.01	2536.49	3361.78	3213.37	637.453	1612.09	3842.19	1336.77	1760.02	2989.49	2046.74	656.805	1113.1	XP_018817136.1|PREDICTED: bark storage protein A-like [Juglans regia]	AT4G24340 | Phosphorylase superfamily protein	C1
FtPinG0007896600.01	2479.38	3665.83	2050.15	1838.96	2206.72	3765.15	2369.78	2133.65	2776.41	1917.04	819.323	1120.86	AHA14497.1|anthocyanidin reductase [Fagopyrum tataricum]	AT1G61720 | BAN , NAD(P)-binding Rossmann-fold superfamily protein	C1
FtPinG0000876500.01	2452.86	1514.17	1908	2139.59	1947.81	906.141	729.24	1920.61	1700.37	624.6	1142.44	864.762	XP_021647843.1|ferritin-2, chloroplastic-like [Hevea brasiliensis]	AT2G40300 | ATFER4, FER4 , ferritin 4	C1
FtPinG0008806400.01	2317.21	3533.06	2722.85	2174.78	2555.11	3373.23	1962.12	2443.05	2571.86	1795.61	1092.43	1310.45	ACC76754.1|CHS2 [Polygonum cuspidatum]	AT5G13930 | CHS, TT4, ATCHS , Chalcone and stilbene synthase family protein	C1
FtPinG0008251700.01	2129.55	3563.47	1800.89	2042.06	2554.32	3681.38	1756.31	2683.93	3834.35	1251.96	1002.04	1089.82	ACQ99190.1|flavanone-3-hydroxylase [Fagopyrum tataricum]	AT3G51240 | F3H, TT6, F3'H , flavanone 3-hydroxylase	C1
FtPinG0007575400.01	2128.53	3163.14	3118.27	6864.18	6848.2	7391.64	2622.1	12911.1	8717.04	1110.3	883.754	1088.71	ACB20694.1|putative cold-inducible protein [Camellia sinensis]	AT4G14690 | ELIP2 , Chlorophyll A-B binding family protein	C1
FtPinG0006341200.01	2100.99	1286.13	2164.27	1410.64	2296.19	1623.54	1137.89	725.849	655.217	718.428	1255.91	1252.8	XP_002520440.1|uncharacterized protein LOC8279780 [Ricinus communis]	AT4G37300 | MEE59 , maternal effect embryo arrest 59	C1
FtPinG0001747900.01	2089.78	1959.1	2859	1514.2	3251.09	2435.31	2161	2154	1633.25	814.096	964.532	947.912	KNA12806.1|hypothetical protein SOVF_122550, partial [Spinacia oleracea]	AT1G64660 | ATMGL, MGL , methionine gamma-lyase	C1
FtPinG0001917100.01	2064.28	1832.41	1472.54	1397.57	1829.83	1725.62	1810.73	498.888	412.307	156.38	300.034	552.117	XP_004134090.1|PREDICTED: glu S.griseus protease inhibitor-like [Cucumis sativus]	AT2G38870 | Serine protease inhibitor, potato inhibitor I-type family protein	C1
FtPinG0001998300.01	2039.8	2348.28	3114.26	1211.56	2854.41	2344.8	1415.93	1049.16	976.965	941.96	1234.76	1274.97	XP_021723825.1|alpha-xylosidase 1-like [Chenopodium quinoa]	AT1G68560 | ATXYL1, XYL1, TRG1 , alpha-xylosidase 1	C1
FtPinG0002353900.01	1920.47	3080.03	1946.04	1672.06	2597.07	2953.38	2029.4	2526.56	2661.35	1251.96	827.978	1082.06	ADT63065.1|flavonoid 3'-hydroxylase, partial [Fagopyrum esculentum]	AT5G07990 | TT7, CYP75B1, D501 , Cytochrome P450 superfamily protein	C1
FtPinG0004684100.01	1808.28	1289.17	1707.79	1358.36	1462.44	1073.69	419.535	597.38	532.696	462.701	402.93	527.726	XP_010936368.1|PREDICTED: nodulin-related protein 1 [Elaeis guineensis]	AT2G03440 | NRP1, ATNRP1 , nodulin-related protein 1	C1
FtPinG0001992900.01	1692.01	2678.68	1591.67	1580.56	1844.08	1812.28	814.334	517.087	494.342	155.46	226.949	381.382	PIA39626.1|hypothetical protein AQUCO_02600227v1 [Aquilegia coerulea]	AT1G13280 | AOC4 , allene oxide cyclase 4	C1
FtPinG0005604600.01	1669.58	1390.52	1601.68	1207.54	1965.23	1312.51	1345.68	811.495	674.394	473.739	507.75	687.375	XP_021722666.1|allene oxide synthase 1, chloroplastic-like [Chenopodium quinoa]	AT5G42650 | AOS, CYP74A, DDE2 , allene oxide synthase	C1
FtPinG0000053800.01	1658.36	2356.39	1451.52	1260.83	1300.91	2333.24	1638.56	1879.93	2402.46	1096.5	676.038	869.196	AEY62396.1|leucoanthocyantin reductase [Fagopyrum dibotrys]	AT1G75290 | NAD(P)-binding Rossmann-fold superfamily protein	C1
FtPinG0004188100.01	1653.26	996.271	1123.18	1416.67	1351.59	1125.69	1271.47	967.799	914.107	337.597	540.446	671.853	GAV87988.1|TPR_11 domain-containing protein [Cephalotus follicularis]	AT1G04530 | TPR4 , Tetratricopeptide repeat (TPR)-like superfamily protein	C1
FtPinG0008513000.01	1583.91	727.694	1452.52	593.213	1264.49	786.734	1051.81	839.33	744.71	398.309	848.173	466.75	XP_017972739.1|PREDICTED: beta-amylase 3, chloroplastic [Theobroma cacao]	AT4G17090 | CT-BMY, BAM3, BMY8 , chloroplast beta-amylase	C1
FtPinG0002065000.01	1545.15	963.839	1479.55	1239.72	1242.32	1061.18	1224.96	696.944	592.358	520.653	755.855	553.226	XP_010244206.1|PREDICTED: maltose excess protein 1, chloroplastic-like [Nelumbo nucifera]	AT5G17520 | RCP1, MEX1 , root cap 1 (RCP1)	C1
FtPinG0001546300.01	1542.09	1534.44	3068.21	2406.03	3403.91	2587.46	783.66	2613.27	2333.21	729.467	745.277	1267.21	PSS21435.1|Glutathione S-transferase [Actinidia chinensis var. chinensis]	AT3G03190 | ATGSTF11, ATGSTF6, GSTF11 , glutathione S-transferase F11	C1
FtPinG0007602100.01	1477.84	1598.29	1557.63	1300.04	1259.74	1471.4	1015.2	737.626	681.851	709.229	676.038	525.509	XP_021859078.1|probable polyamine oxidase 4 [Spinacia oleracea]	AT1G65840 | ATPAO4, PAO4 , polyamine oxidase 4	C1
FtPinG0003379400.01	1448.26	765.193	922.967	596.23	930.355	800.216	815.323	279.42	291.918	147.181	314.459	307.101	AAO18731.1|cysteine protease [Gossypium hirsutum]	AT3G49340 | Cysteine proteinases superfamily protein	C1
FtPinG0002580700.01	1401.34	1017.55	1052.1	1048.68	1120.38	1054.44	761.892	250.514	187.509	241.929	458.706	559.878	GAV72084.1|GH3 domain-containing protein [Cephalotus follicularis]	AT2G46370 | JAR1, FIN219 , Auxin-responsive GH3 family protein	C1
FtPinG0008023100.01	1362.59	1181.74	949.995	898.869	946.19	1107.4	612.482	489.252	429.353	298.962	313.497	406.882	XP_021636536.1|protein TIFY 10A-like [Hevea brasiliensis]	AT1G19180 | TIFY10A , jasmonate-zim-domain protein 1	C1
FtPinG0002925200.01	1361.57	1221.27	1801.89	1001.42	1444.23	1241.25	490.777	417.524	319.618	552.849	501.98	531.052	OIV96656.1|hypothetical protein TanjilG_09198 [Lupinus angustifolius]	AT1G44350 | ILL6 , IAA-leucine resistant (ILR)-like gene 6	C1
FtPinG0002221300.01	1316.69	1120.93	1205.26	2913.78	1356.34	1914.35	161.284	1207.61	1168.74	138.902	48.0824	36.5861	OWM64357.1|hypothetical protein CDL15_Pgr020323 [Punica granatum]	AT3G03190 | ATGSTF11, ATGSTF6, GSTF11 , glutathione S-transferase F11	C1
FtPinG0004168100.01	1313.63	716.545	1477.55	1674.07	897.099	753.994	916.249	464.629	235.452	260.327	274.069	180.713	KNA23068.1|hypothetical protein SOVF_027320 [Spinacia oleracea]	AT1G22770 | GI, FB , gigantea protein (GI)	C1
FtPinG0004503300.01	1305.47	2345.24	2832.97	818.433	1379.3	2849.38	1843.38	1745.04	2033.83	1296.11	443.319	884.718	GAV89915.1|Tryp_alpha_amyl domain-containing protein [Cephalotus follicularis]	AT2G45180 | Bifunctional inhibitor/lipid-transfer protein/seed storage 2S albumin superfamily protein	C1
FtPinG0004067600.01	1290.17	799.652	1023.07	252.367	712.612	801.179	806.418	499.958	310.029	262.167	394.275	542.139	XP_009370039.1|PREDICTED: probable pectate lyase 8 isoform X2 [Pyrus x bretschneideri]	AT4G13710 | Pectin lyase-like superfamily protein	C1
FtPinG0002326900.01	1250.4	1743.22	1792.88	415.249	2553.53	1350.06	3007.99	1513.79	1988.02	293.443	493.325	700.679	OVA14256.1|Chlorophyll A-B binding protein [Macleaya cordata]	AT1G29930 | CAB1, AB140, CAB140, LHCB1.3 , chlorophyll A/B binding protein 1	C1
FtPinG0003341800.01	1181.04	2031.06	2223.33	504.734	969.152	1589.84	1020.14	1207.61	1451.06	1165.49	633.726	902.457	XP_023887852.1|fasciclin-like arabinogalactan protein 7 [Quercus suber]	AT2G04780 | FLA7 , FASCICLIN-like arabinoogalactan 7	C1
FtPinG0003972500.01	1164.73	553.371	846.887	560.034	909.768	703.92	743.092	524.581	478.361	269.526	433.703	541.03	XP_010677101.1|PREDICTED: nudix hydrolase 8 [Beta vulgaris subsp. vulgaris]	AT5G47240 | atnudt8, NUDT8 , nudix hydrolase homolog 8	C1
FtPinG0003039800.01	1163.71	733.775	933.978	784.248	829.005	653.847	603.577	389.689	377.149	428.665	526.983	462.315	XP_010261086.1|PREDICTED: alkane hydroxylase MAH1-like [Nelumbo nucifera]	AT2G23180 | CYP96A1 , cytochrome P450, family 96, subfamily A, polypeptide 1	C1
FtPinG0006686900.01	1138.21	1804.03	1100.15	433.347	566.922	1044.81	704.503	1009.55	1153.82	624.6	740.468	513.314	XP_007209277.1|vignain [Prunus persica]	AT5G50260 | Cysteine proteinases superfamily protein	C1
FtPinG0009433300.01	1056.62	639.519	967.013	532.887	573.257	489.181	372.041	152.022	181.117	140.742	312.535	365.861	ATO91437.1|putative cytochrome P450 [Fallopia multiflora]	AT2G45570 | CYP76C2 , cytochrome P450, family 76, subfamily C, polypeptide 2	C1
FtPinG0004168300.01	1040.3	937.488	1086.14	938.081	817.128	781.92	575.872	479.617	525.239	231.81	216.371	194.017	XP_006473108.1|protein GIGANTEA-like [Citrus sinensis]	AT1G22770 | GI, FB , gigantea protein (GI)	C1
FtPinG0008085000.01	1031.12	1124.99	905.949	250.356	1088.71	1071.77	2174.86	450.712	641.366	215.252	537.561	508.879	CBI29312.3|unnamed protein product, partial [Vitis vinifera]	AT5G09360 | LAC14 , laccase 14	C1
FtPinG0001214600.01	966.865	705.397	839.88	1003.44	869.387	652.884	465.051	396.112	452.792	239.169	302.919	324.84	ACH63237.1|pathogen-induced protein-like protein [Rheum australe]	AT5G53160 | RCAR3, PYL8 , regulatory components of ABA receptor 3	C1
FtPinG0003694500.01	930.149	1178.7	1473.54	442.396	1298.54	775.179	465.051	502.099	336.664	232.73	410.623	513.314	PON89882.1|HMW glutenin [Trema orientale]	AT2G45180 | Bifunctional inhibitor/lipid-transfer protein/seed storage 2S albumin superfamily protein	C1
FtPinG0003300400.01	903.632	817.895	988.035	489.652	870.97	732.809	575.872	501.029	502.865	234.57	360.618	439.033	XP_021769816.1|uncharacterized protein LOC110734060 [Chenopodium quinoa]	AT2G31040 | ATP synthase protein I -related	C1
FtPinG0002765000.01	886.293	414.522	751.788	361.961	353.139	311.997	131.6	80.2931	78.8391	41.3947	65.392	86.4762	PSS31426.1|Methyltransferase PMT5 [Actinidia chinensis var. chinensis]	AT5G42900 | COR27 , cold regulated gene 27	C1
FtPinG0000551900.01	885.273	1406.74	804.843	735.987	1023.79	1268.21	702.524	1048.09	1426.56	514.214	372.157	498.901	ACZ51475.1|chalcone synthase [Fagopyrum tataricum]	AT5G13930 | CHS, TT4, ATCHS , Chalcone and stilbene synthase family protein	C1
FtPinG0001549100.01	857.736	1776.67	1160.22	633.431	749.034	1371.25	950.881	774.025	1016.38	485.698	250.028	552.117	XP_024988897.1|phosphomethylethanolamine N-methyltransferase-like isoform X1 [Cynara cardunculus var. scolymus]	AT3G18000 | NMT1, XPL1, PEAMT , S-adenosyl-L-methionine-dependent methyltransferases superfamily protein	C1
FtPinG0002704000.01	836.318	2790.17	1602.68	367.993	1458.48	1027.47	1130.96	943.176	784.129	599.763	750.085	641.919	XP_010680173.1|PREDICTED: 36.4 kDa proline-rich protein [Beta vulgaris subsp. vulgaris]	AT3G22142 | Bifunctional inhibitor/lipid-transfer protein/seed storage 2S albumin superfamily protein	C1
FtPinG0006907000.01	827.139	1317.55	722.757	520.821	655.603	1376.06	949.891	762.249	1232.66	578.606	242.335	373.621	AGE13752.1|flavonol synthase [Fagopyrum tataricum]	AT5G08640 | FLS1 , flavonol synthase 1	C1
FtPinG0004058500.01	822.04	801.679	544.571	557.017	444.195	304.294	248.357	234.456	259.956	193.175	236.565	207.321	XP_024994599.1|E3 ubiquitin-protein ligase RMA1H1-like isoform X2 [Cynara cardunculus var. scolymus]	AT4G03510 | RMA1, ATRMA1 , RING membrane-anchor 1	C1
FtPinG0000269800.01	802.662	1101.68	851.892	817.428	939.064	938.881	726.271	562.051	559.331	401.069	385.621	490.032	XP_002320051.1|arginase 1, mitochondrial [Populus trichocarpa]	AT4G08900 | arginase	C1
FtPinG0007444800.01	801.642	813.841	1150.2	604.273	1059.42	1154.58	865.786	709.791	593.424	413.947	380.812	434.598	OMP11383.1|hypothetical protein CCACVL1_00554 [Corchorus capsularis]	AT2G46210 | Fatty acid/sphingolipid desaturase	C1
FtPinG0007584200.01	776.144	692.221	866.908	837.537	1228.07	814.66	716.376	555.628	571.051	275.045	325.037	347.013	XP_021640459.1|uncharacterized protein LOC110635434 [Hevea brasiliensis]	AT1G04280 | P-loop containing nucleoside triphosphate hydrolases superfamily protein	C1
FtPinG0006562400.01	773.084	558.439	623.653	438.375	832.172	711.624	502.651	329.737	241.844	169.258	198.099	190.691	ADM35974.1|protein disulfide isomerase [Citrus limon]	AT1G77510 | ATPDIL1-2, PDI6, ATPDI6, PDIL1-2 , PDI-like 1-2	C1
FtPinG0001648200.01	697.612	521.953	578.606	221.198	597.802	509.403	486.819	264.432	275.937	129.703	160.595	237.255	XP_023893217.1|rhodanese-like domain-containing protein 14, chloroplastic [Quercus suber]	AT4G27700 | Rhodanese/Cell cycle control phosphatase superfamily protein	C1
FtPinG0006890500.01	692.512	777.355	802.841	414.244	602.553	942.733	644.145	474.264	492.211	404.748	230.795	296.015	AEG47693.1|farnesyl diphosphate synthase [Allium sativum]	AT5G47770 | FPS1 , farnesyl diphosphate synthase 1	C1
FtPinG0001985100.01	664.975	521.953	826.866	517.805	672.231	687.55	365.115	508.523	338.795	193.175	217.332	363.643	XP_002267092.1|PREDICTED: dof zinc finger protein DOF5.4 [Vitis vinifera]	AT5G60850 | OBP4 , OBF binding protein 4	C1
FtPinG0005832200.01	646.617	405.4	555.582	279.514	320.675	307.183	239.452	177.715	155.547	132.463	144.247	215.082	EOY22319.1|BTB and TAZ domain protein 2 isoform 1 [Theobroma cacao]	AT3G48360 | BT2, ATBT2 , BTB and TAZ domain protein 2	C1
FtPinG0000969400.01	644.577	533.101	405.425	654.546	517.831	466.07	484.84	336.16	425.092	204.214	238.489	293.797	XP_021843379.1|cysteine proteinase inhibitor A-like [Spinacia oleracea]	AT3G12490 | ATCYSB, ATCYS6, CYSB , cystatin B	C1
FtPinG0005515700.01	643.557	1017.55	328.344	82.4466	171.819	528.662	68.2734	414.312	702.094	323.799	119.244	108.65	XP_021745404.1|MLP-like protein 43 [Chenopodium quinoa]	AT5G28010 | Polyketide cyclase/dehydrase and lipid transport superfamily protein	C1
FtPinG0003140400.01	601.741	509.791	454.476	1450.86	1190.06	745.327	1055.76	551.346	841.66	66.2315	455.821	125.28	AOS85163.1|UGT2 [Fagopyrum tataricum]	AT5G17050 | UGT78D2 , UDP-glucosyl transferase 78D2	C1
FtPinG0007498200.01	596.642	407.427	603.632	439.38	579.591	436.219	446.251	335.09	343.056	182.137	238.489	205.104	OMO69460.1|hypothetical protein CCACVL1_19501 [Corchorus capsularis]	AT5G02810 | PRR7, APRR7 , pseudo-response regulator 7	C1
FtPinG0004422400.01	574.204	489.521	441.462	320.737	471.908	389.034	400.735	341.513	320.683	164.659	272.146	284.928	PON87431.1|Splicing factor-like protein [Trema orientale]	AT2G35410 | RNA-binding (RRM/RBD/RNP motifs) family protein	C1
FtPinG0000551600.01	570.124	988.163	550.577	607.29	669.063	795.401	547.177	783.66	904.518	413.027	296.187	324.84	ACZ51475.1|chalcone synthase [Fagopyrum tataricum]	AT5G13930 | CHS, TT4, ATCHS , Chalcone and stilbene synthase family protein	C1
FtPinG0008695600.01	570.124	557.425	478.501	756.096	468.74	493.033	479.893	466.77	404.849	211.573	258.683	311.536	XP_012067872.1|uncharacterized protein LOC105630609 [Jatropha curcas]	AT2G29670 | Tetratricopeptide repeat (TPR)-like superfamily protein	C1
FtPinG0003576200.01	568.084	518.912	518.543	436.364	530.5	470.885	340.378	340.443	331.337	270.445	231.757	253.885	XP_012070330.1|MLO-like protein 1 isoform X4 [Jatropha curcas]	AT4G02600 | MLO1, ATMLO1 , Seven transmembrane MLO family protein	C1
FtPinG0009364700.01	565.025	516.885	668.701	475.576	481.409	584.514	446.251	340.443	366.495	278.724	172.135	270.515	XP_008366748.1|PREDICTED: tubulin beta chain [Malus domestica]	AT1G75780 | TUB1 , tubulin beta-1 chain	C1
FtPinG0005295100.01	562.985	875.665	1003.05	489.652	587.509	1392.43	776.734	1066.29	1275.28	492.137	144.247	328.166	XP_023921917.1|peroxidase 27-like [Quercus suber]	AT5G15180 | Peroxidase superfamily protein	C1
FtPinG0006187800.01	557.885	875.665	890.933	462.505	551.087	474.737	281.999	324.384	494.342	209.733	478.9	456.772	PON93888.1|Gibberellin regulated protein [Trema orientale]	AT1G74670 | Gibberellin-regulated family protein	C1
FtPinG0005398000.01	547.686	308.104	366.384	443.402	330.969	265.776	123.684	40.6818	45.8119	16.5579	19.2329	24.3907	XP_021839707.1|cytochrome P450 76AD1-like [Spinacia oleracea]	AT2G45550 | CYP76C4 , cytochrome P450, family 76, subfamily C, polypeptide 4	C1
FtPinG0008141200.01	546.667	1006.41	698.732	314.705	433.902	310.072	312.673	168.08	196.032	182.137	397.16	178.496	XP_021732933.1|peroxidase P7-like [Chenopodium quinoa]	AT5G05340 | Peroxidase superfamily protein	C1
FtPinG0000701100.01	511.99	190.538	228.239	261.416	612.846	244.591	332.462	164.868	199.228	62.552	91.3565	123.062	XP_021645074.1|gamma-glutamyl peptidase 3-like [Hevea brasiliensis]	AT2G23970 | Class I glutamine amidotransferase-like superfamily protein	C1
FtPinG0007160500.01	497.711	389.184	364.382	286.552	352.347	293.701	160.294	132.751	169.397	85.5491	118.283	97.5629	XP_023745034.1|protein EARLY FLOWERING 4-like isoform X1 [Lactuca sativa]	AT2G29950 | ELF4-L1 , ELF4-like 1	C1
FtPinG0006892000.01	496.691	435.805	605.634	55.2995	386.394	793.475	391.83	302.973	673.328	181.217	84.625	123.062	XP_021716352.1|repetitive proline-rich cell wall protein 1-like [Chenopodium quinoa]	-	C1
FtPinG0000899300.01	477.313	493.575	439.46	344.868	324.634	303.331	274.083	241.95	301.506	275.965	228.872	187.365	XP_010056168.1|PREDICTED: urea-proton symporter DUR3 [Eucalyptus grandis]	AT5G45380 | ATDUR3, DUR3 , solute:sodium symporters;urea transmembrane transporters	C1
FtPinG0000080500.01	468.134	540.196	692.726	90.4902	423.608	879.178	567.956	588.816	974.834	381.751	180.79	196.234	XP_010675452.1|PREDICTED: DNA-directed RNA polymerase II subunit RPB1 isoform X2 [Beta vulgaris subsp. vulgaris]	AT2G47540 | Pollen Ole e 1 allergen and extensin family protein	C1
FtPinG0006907100.01	468.134	929.38	592.621	686.72	901.058	883.03	587.745	696.944	907.715	288.843	304.842	348.122	AEC33116.1|flavonol synthase [Fagopyrum tataricum]	AT5G08640 | FLS1 , flavonol synthase 1	C1
FtPinG0008985200.01	453.856	854.381	673.706	347.884	1175.81	605.699	623.366	314.749	403.784	192.255	338.5	294.906	ACD01043.1|polygalacturonase-inhibiting protein [Knorringia sibirica]	AT5G06860 | PGIP1, ATPGIP1 , polygalacturonase inhibiting protein 1	C1
FtPinG0003285700.01	451.816	717.559	419.439	314.705	398.271	712.587	355.22	433.583	608.339	300.802	171.173	299.341	XP_011040680.1|PREDICTED: dihydrofolate reductase-like [Populus euphratica]	AT5G65400 | alpha/beta-Hydrolases superfamily protein	C1
FtPinG0008941400.01	445.696	971.947	831.871	94.5119	313.549	961.992	259.241	428.23	725.532	414.867	225.025	227.277	XP_012854468.1|PREDICTED: kirola-like [Erythranthe guttata]	AT1G70840 | MLP31 , MLP-like protein 31	C1
FtPinG0001194400.01	440.597	720.599	463.486	163.888	421.233	638.439	426.462	338.301	522.042	338.517	131.746	256.103	XP_023885260.1|serine carboxypeptidase-like 13 [Quercus suber]	AT3G12203 | scpl17 , serine carboxypeptidase-like 17	C1
FtPinG0006838700.01	436.517	287.834	390.409	207.122	331.76	285.998	322.567	154.163	92.6892	92.9081	139.439	144.127	XP_002269341.2|PREDICTED: chaperonin 60 subunit beta 4, chloroplastic [Vitis vinifera]	AT1G26230 | TCP-1/cpn60 chaperonin family protein	C1
FtPinG0003395800.01	431.418	360.806	472.495	326.77	401.438	349.553	333.451	319.031	334.533	147.181	92.3181	158.54	XP_010113411.1|salicylate carboxymethyltransferase [Morus notabilis]	AT4G36470 | S-adenosyl-L-methionine-dependent methyltransferases superfamily protein	C1
FtPinG0009736500.01	428.358	1101.68	407.427	212.149	1190.06	854.141	695.598	328.666	237.583	30.3561	130.784	167.409	OAJ37744.1|hypothetical protein BDEG_21734 [Batrachochytrium dendrobatidis JEL423]	-	C1
FtPinG0001112900.01	426.318	822.963	436.457	53.2887	253.373	488.218	160.294	261.22	641.366	314.6	99.0497	127.497	XP_024181831.1|protein SRG1-like [Rosa chinensis]	AT5G20400 | 2-oxoglutarate (2OG) and Fe(II)-dependent oxygenase superfamily protein	C1
FtPinG0002580000.01	425.298	334.455	338.354	320.737	364.224	310.072	345.325	270.855	209.882	94.7479	100.011	130.823	XP_023891065.1|protein SUPPRESSOR OF PHYA-105 1-like [Quercus suber]	AT2G46340 | SPA1 , SPA (suppressor of phyA-105) protein family	C1
FtPinG0009526400.01	424.279	331.415	410.43	199.078	422.025	308.146	284.967	217.327	201.359	118.665	146.17	185.148	OVA13319.1|3-dehydroquinate synthase [Macleaya cordata]	AT3G28760 | FUNCTIONS IN: molecular_function unknown; INVOLVED IN: biological_process unknown; LOCATED IN: chloroplast; EXPRESSED IN: 20 plant structures; EXPRESSED DURING: 13 growth stages; CONTAINS InterPro DOMAIN/s: 3-dehydroquinate synthase, prokaryotic-type (InterPro:IPR002812); Has 390 Blast hits to 390 proteins in 131 species: Archae - 144; Bacteria - 105; Metazoa - 0; Fungi - 0; Plants - …	C1
FtPinG0009526000.01	419.179	414.522	547.574	42.2287	287.42	698.142	271.115	258.008	473.034	124.184	107.704	77.6068	XP_026061304.1|titin-like [Carassius auratus]	-	C1
FtPinG0007126900.01	408.98	403.373	644.675	734.981	494.869	292.738	297.831	245.162	151.286	212.493	332.73	147.453	XP_021756750.1|pectinesterase/pectinesterase inhibitor PPE8B-like [Chenopodium quinoa]	AT4G33220 | PME44, ATPME44 , pectin methylesterase 44	C1
FtPinG0008416800.01	395.721	243.24	282.296	202.095	302.464	245.554	174.147	127.398	144.893	31.276	35.5809	34.3687	XP_023902786.1|chaperone protein dnaJ C76, chloroplastic-like [Quercus suber]	AT5G23240 | DNAJ heat shock N-terminal domain-containing protein	C1
FtPinG0006563600.01	388.582	132.769	260.273	136.741	209.825	99.1844	182.063	98.4928	137.436	57.0327	115.398	83.1502	AXJ94106.1|NAC domain containing transcription factor NAC6 [Fagopyrum tataricum]	AT1G01720 | ATAF1, ANAC002 , NAC (No Apical Meristem) domain transcriptional regulator superfamily protein	C1
FtPinG0001258700.01	385.522	384.117	424.445	123.67	196.364	456.441	426.462	274.067	438.942	264.006	124.052	162.974	XP_011097618.1|alanine--glyoxylate aminotransferase 2 homolog 1, mitochondrial [Sesamum indicum]	AT4G39660 | AGT2 , alanine:glyoxylate aminotransferase 2	C1
FtPinG0000887400.01	383.483	867.557	442.464	649.518	602.553	686.587	790.587	892.859	1390.34	315.52	253.875	270.515	XP_021764180.1|protein SRG1-like [Chenopodium quinoa]	AT1G17020 | SRG1, ATSRG1 , senescence-related gene 1	C1
FtPinG0002487100.01	382.463	690.194	442.464	295.601	327.802	399.626	384.904	465.7	442.138	222.612	197.138	277.167	AYK27447.1|STAR2 [Fagopyrum esculentum]	AT2G37330 | ALS3 , aluminum sensitive 3	C1
FtPinG0009695700.01	371.244	343.577	378.396	233.264	313.549	298.516	234.504	134.892	203.49	87.3888	75.9701	106.432	KNA11738.1|hypothetical protein SOVF_131890, partial [Spinacia oleracea]	AT3G54500 | BEST Arabidopsis thaliana protein match is: dentin sialophosphoprotein-related (TAIR:AT5G64170.1); Has 183 Blast hits to 175 proteins in 44 species: Archae - 0; Bacteria - 4; Metazoa - 38; Fungi - 11; Plants - 120; Viruses - 0; Other Eukaryotes - 10 (source: NCBI BLink).	C1
FtPinG0002458000.01	362.065	631.411	477.5	208.127	402.23	394.812	107.852	211.974	321.749	222.612	143.285	320.405	XP_021851243.1|protein STRICTOSIDINE SYNTHASE-LIKE 10-like [Spinacia oleracea]	AT3G57030 | Calcium-dependent phosphotriesterase superfamily protein	C1
FtPinG0002468000.01	359.005	344.59	480.503	105.572	228.036	630.736	239.452	263.361	432.549	148.101	69.2386	101.998	XP_006487931.3|peroxidase 60 [Citrus sinensis]	AT5G17820 | Peroxidase superfamily protein	C1
FtPinG0008194300.01	352.886	255.402	320.336	221.198	193.989	210.887	294.862	162.727	149.155	89.2286	125.976	190.691	XP_021741789.1|probable glycosyltransferase At5g20260 [Chenopodium quinoa]	AT5G20260 | Exostosin family protein	C1
FtPinG0007916100.01	339.627	585.803	958.004	941.098	465.573	431.404	397.767	332.949	590.228	301.721	337.538	206.212	KYP48943.1|hypothetical protein KK1_029344, partial [Cajanus cajan]	-	C1
FtPinG0003136700.01	338.607	621.276	330.346	53.2887	178.945	815.623	338.399	370.419	556.135	241.009	180.79	184.039	XP_010653359.1|PREDICTED: cationic peroxidase 1 [Vitis vinifera]	AT5G05340 | Peroxidase superfamily protein	C1
FtPinG0002597300.01	329.428	232.092	266.279	321.743	315.133	287.924	288.925	172.362	203.49	44.1544	46.1591	56.5421	XP_021767223.1|two-component response regulator-like APRR3 isoform X2 [Chenopodium quinoa]	AT2G46790 | APRR9, PRR9, TL1 , pseudo-response regulator 9	C1
FtPinG0008216500.01	329.428	245.267	221.232	327.775	204.282	164.665	139.515	65.305	89.493	99.3473	115.398	107.541	BAF75888.1|glucosyltransferase [Dianthus caryophyllus]	AT2G36970 | UDP-Glycosyltransferase superfamily protein	C1
FtPinG0008985400.01	328.408	1112.82	682.715	179.975	1599.42	492.07	636.229	231.244	385.672	153.62	322.152	353.665	ACD01043.1|polygalacturonase-inhibiting protein [Knorringia sibirica]	AT5G06860 | PGIP1, ATPGIP1 , polygalacturonase inhibiting protein 1	C1
FtPinG0007816300.01	328.408	200.673	326.342	275.492	306.423	210.887	255.283	206.621	99.0815	109.466	162.518	124.171	XP_021621835.1|probable plastid-lipid-associated protein 13, chloroplastic [Manihot esculenta]	AT2G42130 | Plastid-lipid associated protein PAP / fibrillin family protein	C1
FtPinG0002829600.01	324.328	593.911	235.246	59.3213	198.74	440.07	307.725	415.383	829.941	204.214	110.589	101.998	GAV72919.1|SUI1 domain-containing protein, partial [Cephalotus follicularis]	AT5G54940 | Translation initiation factor SUI1 family protein	C1
FtPinG0007714100.01	318.209	268.578	304.319	206.116	197.156	160.814	155.347	102.775	80.9698	112.226	95.2031	60.9768	PON85795.1|Equilibrative nucleoside transporter [Trema orientale]	AT4G05120 | ENT3, FUR1, ATENT3 , Major facilitator superfamily protein	C1
FtPinG0006744800.01	318.209	174.322	279.293	30.1634	121.936	130.962	60.3577	6.42345	5.32696	1.83976	7.69318	17.7387	XP_004134648.2|PREDICTED: protein TIFY 5A [Cucumis sativus]	AT1G30135 | JAZ8, TIFY5A , jasmonate-zim-domain protein 8	C1
FtPinG0000403400.01	308.01	233.105	332.348	48.2614	134.604	403.478	159.305	170.221	210.948	141.662	42.3125	65.4115	XP_008355237.1|PREDICTED: peroxidase 60-like [Malus domestica]	AT5G17820 | Peroxidase superfamily protein	C1
FtPinG0006074300.01	305.97	1161.47	226.237	789.275	195.572	632.662	386.883	509.593	904.518	117.745	112.513	131.932	XP_010665533.1|PREDICTED: glucose-6-phosphate/phosphate translocator 2, chloroplastic [Beta vulgaris subsp. vulgaris]	AT1G61800 | GPT2, ATGPT2 , glucose-6-phosphate/phosphate translocator 2	C1
FtPinG0000594700.01	305.97	214.862	223.234	179.975	253.373	203.184	166.231	116.693	131.043	71.7508	96.1647	134.149	XP_010111634.1|glucose-6-phosphate 1-dehydrogenase, cytoplasmic [Morus notabilis]	AT5G40760 | G6PD6 , glucose-6-phosphate dehydrogenase 6	C1
FtPinG0004412500.01	302.91	426.684	533.559	358.944	893.932	789.623	404.693	1003.13	653.086	116.825	102.896	245.016	XP_023891959.1|bifunctional 3-dehydroquinate dehydratase/shikimate dehydrogenase, chloroplastic-like isoform X1 [Quercus suber]	AT3G06350 | EMB3004, MEE32 , dehydroquinate dehydratase, putative / shikimate dehydrogenase, putative	C1
FtPinG0008259500.01	302.91	233.105	334.35	496.69	655.603	240.739	242.42	281.561	273.806	95.6678	148.094	133.04	-	-	C1
FtPinG0009467800.01	292.711	270.605	420.44	81.4411	280.294	557.551	395.788	365.066	580.639	222.612	104.82	123.062	XP_021716748.1|repetitive proline-rich cell wall protein 2-like [Chenopodium quinoa]	AT2G47540 | Pollen Ole e 1 allergen and extensin family protein	C1
FtPinG0009801500.01	292.711	361.82	344.361	209.133	277.127	405.404	216.694	241.95	243.975	188.576	115.398	160.757	ADG36702.1|squalene synthase 1 [Glycyrrhiza uralensis]	AT4G34640 | SQS1, ERG9 , squalene synthase 1	C1
FtPinG0001214900.01	289.652	230.065	259.272	201.089	315.133	214.739	240.441	127.398	113.997	91.0684	115.398	162.974	XP_007015756.2|PREDICTED: uncharacterized protein LOC18590272 isoform X1 [Theobroma cacao]	AT5G22340 | unknown protein; FUNCTIONS IN: molecular_function unknown; INVOLVED IN: biological_process unknown; LOCATED IN: chloroplast; EXPRESSED IN: 22 plant structures; EXPRESSED DURING: 13 growth stages; Has 58 Blast hits to 58 proteins in 20 species: Archae - 0; Bacteria - 0; Metazoa - 0; Fungi - 0; Plants - 57; Viruses - 0; Other Eukaryotes - 1 (source: NCBI BLink).	C1
FtPinG0003009400.01	286.592	289.861	258.271	156.85	231.995	192.591	176.126	165.939	160.874	114.985	130.784	151.888	XP_010677339.1|PREDICTED: uncharacterized acetyltransferase At3g50280 [Beta vulgaris subsp. vulgaris]	AT5G42830 | HXXXD-type acyl-transferase family protein	C1
FtPinG0008083600.01	282.512	464.183	471.494	81.4411	333.344	482.441	164.252	252.656	362.234	216.172	130.784	185.148	CBI29312.3|unnamed protein product, partial [Vitis vinifera]	AT5G09360 | LAC14 , laccase 14	C1
FtPinG0004681600.01	276.393	110.472	165.173	80.4357	110.059	89.5548	99.9365	43.8935	38.3541	43.2345	40.3892	64.3028	XP_023894281.1|uncharacterized protein LOC112006215 [Quercus suber]	-	C1
FtPinG0009696100.01	274.353	171.282	246.258	136.741	165.484	177.184	140.505	81.3636	107.605	78.19	142.324	140.801	XP_027109175.1|pectinesterase inhibitor-like [Coffea arabica]	AT5G60520 | Late embryogenesis abundant (LEA) protein-related	C1
FtPinG0005184600.01	271.293	176.349	276.289	325.765	185.279	168.517	170.189	120.975	143.828	38.6351	23.0795	28.8254	XP_017977296.1|PREDICTED: two-component response regulator-like APRR7 [Theobroma cacao]	AT5G02810 | PRR7, APRR7 , pseudo-response regulator 7	C1
FtPinG0003543800.01	271.293	273.645	180.189	264.432	205.866	242.665	197.894	194.845	203.49	128.784	99.0497	94.2369	XP_019102913.1|PREDICTED: transcription factor MYB23 [Beta vulgaris subsp. vulgaris]	AT5G35550 | TT2, ATMYB123, MYB123, ATTT2 , Duplicated homeodomain-like superfamily protein	C1
FtPinG0006598000.01	270.274	260.47	239.251	239.296	213.784	173.332	166.231	134.892	149.155	105.786	110.589	148.562	XP_023916882.1|probable magnesium transporter NIPA2 [Quercus suber]	AT4G13800 | Protein of unknown function (DUF803)	C1
FtPinG0001703300.01	269.254	254.389	234.245	202.095	229.619	253.257	164.252	175.574	138.501	125.104	109.628	128.606	XP_018820878.1|PREDICTED: WAT1-related protein At3g28050-like [Juglans regia]	AT3G28050 | nodulin MtN21 /EamA-like transporter family protein	C1
FtPinG0001706400.01	263.134	515.872	286.3	89.4847	197.156	415.034	359.178	262.291	470.904	179.377	81.74	138.584	XP_021715053.1|GDSL esterase/lipase At1g28650-like [Chenopodium quinoa]	AT1G28600 | GDSL-like Lipase/Acylhydrolase superfamily protein	C1
FtPinG0007036200.01	262.114	148.985	199.209	105.572	158.358	125.184	131.6	88.8577	59.662	89.2286	103.858	83.1502	XP_021857452.1|WAT1-related protein At5g40240-like [Spinacia oleracea]	AT3G28050 | nodulin MtN21 /EamA-like transporter family protein	C1
FtPinG0001500800.01	261.094	119.593	184.193	114.621	163.109	178.147	149.41	101.705	82.0352	28.5164	70.2003	80.9328	XP_016725911.1|PREDICTED: pentatricopeptide repeat-containing protein At2g35130-like [Gossypium hirsutum]	AT2G35130 | Tetratricopeptide repeat (TPR)-like superfamily protein	C1
FtPinG0006033900.01	257.015	264.524	372.39	83.452	307.215	439.108	305.746	258.008	372.887	170.178	96.1647	139.692	XP_010669462.1|PREDICTED: leucine-rich repeat extensin-like protein 4 [Beta vulgaris subsp. vulgaris]	AT1G62440 | LRX2 , leucine-rich repeat/extensin 2	C1
FtPinG0002438900.01	255.995	650.668	739.775	180.98	490.119	961.029	255.283	388.618	972.704	223.531	130.784	247.233	AKH80293.1|annexin [Fagopyrum tataricum]	AT5G12380 | ANNAT8 , annexin 8	C1
FtPinG0003013100.01	255.995	137.836	293.307	92.5011	91.8478	77.9994	59.3682	37.4701	63.9236	53.3532	34.6193	33.2601	XP_010664569.1|PREDICTED: uncharacterized protein LOC100267847 [Vitis vinifera]	AT5G42900 | COR27 , cold regulated gene 27	C1
FtPinG0000418100.01	253.955	302.023	342.359	39.2124	161.525	450.663	126.652	209.833	393.13	108.546	65.392	93.1282	XP_023333238.1|von Willebrand factor A domain-containing protein 8-like [Eurytemora affinis]	-	C1
FtPinG0003530300.01	248.856	236.146	358.375	43.2342	157.566	290.812	63.3261	90.9988	190.705	53.3532	67.3153	42.1294	XP_013619531.1|PREDICTED: pathogenesis-related protein PR-1-like [Brassica oleracea var. oleracea]	AT5G57625 | CAP (Cysteine-rich secretory proteins, Antigen 5, and Pathogenesis-related 1 protein) superfamily protein	C1
FtPinG0008486300.01	245.796	232.092	220.231	139.757	198.74	210.887	124.673	108.128	111.866	94.7479	146.17	138.584	EOY07323.1|Fructokinase-like 1 [Theobroma cacao]	AT3G54090 | FLN1 , fructokinase-like 1	C1
FtPinG0002196700.01	244.776	207.768	221.232	125.681	151.232	155.999	136.547	107.057	142.763	78.19	55.7755	97.5629	XP_021840386.1|dnaJ homolog subfamily B member 6-like [Spinacia oleracea]	AT1G56300 | Chaperone DnaJ-domain superfamily protein	C1
FtPinG0008084200.01	242.736	325.334	382.401	124.675	219.326	441.996	273.094	181.998	316.422	180.297	46.1591	138.584	CBI29312.3|unnamed protein product, partial [Vitis vinifera]	AT5G09360 | LAC14 , laccase 14	C1
FtPinG0008656500.01	227.438	143.917	216.227	162.882	231.995	122.295	98.947	48.1758	53.2696	25.7567	30.7727	36.5861	XP_022743516.1|protein EARLY FLOWERING 4-like [Durio zibethinus]	AT2G40080 | ELF4 , Protein of unknown function (DUF1313)	C1
FtPinG0002908700.01	227.438	164.187	195.204	73.3976	117.185	147.332	101.915	70.6579	59.662	41.3947	56.7372	56.5421	XP_002276871.1|PREDICTED: UDP-glycosyltransferase 76F1 isoform X2 [Vitis vinifera]	AT3G11340 | UDP-Glycosyltransferase superfamily protein	C1
FtPinG0006716700.01	222.338	124.661	183.192	111.605	106.1	116.518	154.357	90.9988	57.5312	43.2345	50.9673	44.3468	XP_024017603.1|UDP-galactose/UDP-glucose transporter 4 [Morus notabilis]	AT1G12600 | UDP-N-acetylglucosamine (UAA) transporter family	C1
FtPinG0006561700.01	221.318	177.363	147.154	134.73	118.769	183.924	85.0944	62.0933	50.0735	40.4748	88.4715	113.084	XP_011027512.1|PREDICTED: IAA-amino acid hydrolase ILR1-like 6 [Populus euphratica]	AT1G44350 | ILL6 , IAA-leucine resistant (ILR)-like gene 6	C1
FtPinG0006149200.01	210.099	352.698	237.249	73.3976	163.901	267.702	196.905	170.221	303.637	141.662	75.0085	115.302	XP_021639554.1|phospholipase A2-alpha [Hevea brasiliensis]	AT2G06925 | ATSPLA2-ALPHA, PLA2-ALPHA , Phospholipase A2 family protein	C1
FtPinG0001284900.01	209.08	175.336	177.186	106.577	145.69	104.962	118.736	82.4342	79.9045	56.1128	82.7017	104.215	XP_021843628.1|VQ motif-containing protein 4-like [Spinacia oleracea]	AT1G28280 | VQ motif-containing protein	C1
FtPinG0002908500.01	208.06	201.687	198.208	162.882	184.487	272.516	159.305	150.951	149.155	104.867	88.4715	98.6715	XP_010658498.1|PREDICTED: UDP-glycosyltransferase 76F1 isoform X1 [Vitis vinifera]	AT3G11340 | UDP-Glycosyltransferase superfamily protein	C1
FtPinG0000754400.01	207.04	265.537	289.303	46.2505	146.481	369.775	147.431	222.679	302.572	174.778	104.82	96.4542	ACH63235.1|alcohol dehydrogenase [Rheum australe]	AT3G24503 | ALDH2C4, ALDH1A, REF1 , aldehyde dehydrogenase 2C4	C1
FtPinG0004852000.01	197.861	262.497	174.182	108.588	133.813	257.109	144.463	170.221	210.948	126.944	57.6988	92.0195	XP_021773164.1|probable aldo-keto reductase 1 isoform X1 [Chenopodium quinoa]	AT1G60690 | NAD(P)-linked oxidoreductase superfamily protein	C1
FtPinG0004120600.01	195.821	299.996	315.33	67.3649	228.036	418.885	343.346	300.831	499.669	173.858	68.277	129.714	XP_021716352.1|repetitive proline-rich cell wall protein 1-like [Chenopodium quinoa]	-	C1
FtPinG0009344900.01	195.821	60.81	142.149	113.615	92.6396	90.5178	91.0313	65.305	67.1197	15.638	42.3125	33.2601	XP_021746820.1|uncharacterized protein LOC110712655 [Chenopodium quinoa]	AT1G71000 | Chaperone DnaJ-domain superfamily protein	C1
FtPinG0004334300.01	193.781	204.727	187.196	189.024	101.349	91.4807	151.389	90.9988	161.94	59.7924	133.669	58.7595	XP_004296827.1|PREDICTED: flowering-promoting factor 1-like protein 3 [Fragaria vesca subsp. vesca]	AT5G24860 | FPF1, ATFPF1 , flowering promoting factor 1	C1
FtPinG0003155100.01	191.741	224.997	340.357	33.1797	148.065	355.33	51.4525	104.916	164.07	64.3918	59.6221	73.1722	XP_021716340.1|peroxidase 60-like [Chenopodium quinoa]	AT5G22410 | RHS18 , root hair specific 18	C1
FtPinG0003462900.01	184.602	119.593	121.127	190.029	146.481	155.999	126.652	87.7871	161.94	34.9555	36.5426	28.8254	XP_002264923.1|PREDICTED: protein LNK1 [Vitis vinifera]	AT5G64170 | dentin sialophosphoprotein-related	C1
FtPinG0001879900.01	180.522	322.293	192.201	66.3595	129.062	175.258	82.126	175.574	199.228	110.386	75.9701	120.845	XP_004499019.1|PREDICTED: probable isoaspartyl peptidase/L-asparaginase 2 [Cicer arietinum]	AT3G16150 | N-terminal nucleophile aminohydrolases (Ntn hydrolases) superfamily protein	C1
FtPinG0005996200.01	179.502	272.632	157.165	24.1307	129.062	182.961	120.715	113.481	196.032	134.303	64.4304	72.0635	XP_010098422.1|X-linked retinitis pigmentosa GTPase regulator [Morus notabilis]	AT5G17160 | unknown protein; BEST Arabidopsis thaliana protein match is: unknown protein (TAIR:AT3G03130.1); Has 14330 Blast hits to 10381 proteins in 896 species: Archae - 94; Bacteria - 2881; Metazoa - 4019; Fungi - 1576; Plants - 515; Viruses - 110; Other Eukaryotes - 5135 (source: NCBI BLink).	C1
FtPinG0004361700.01	178.483	209.795	154.162	66.3595	173.402	77.0364	122.694	92.0694	101.212	58.8725	97.1264	55.4334	XP_018834056.1|PREDICTED: probable alpha-mannosidase At5g13980 isoform X4 [Juglans regia]	AT5G13980 | Glycosyl hydrolase family 38 protein	C1
FtPinG0002006900.01	172.363	280.74	351.368	67.3649	212.992	236.887	115.768	173.433	141.697	67.1514	151.94	89.8022	XP_023921056.1|uncharacterized protein LOC112032523 isoform X1 [Quercus suber]	AT3G50560 | NAD(P)-binding Rossmann-fold superfamily protein	C1
FtPinG0009173700.01	170.323	143.917	238.25	31.1688	125.895	323.553	87.0734	88.8577	243.975	55.1929	50.0057	49.8901	XP_012878486.1|PREDICTED: polypeptide N-acetylgalactosaminyltransferase 9 [Dipodomys ordii]	-	C1
FtPinG0008523600.01	168.284	168.241	261.274	66.3595	258.124	147.332	206.799	53.5287	87.3622	56.1128	56.7372	73.1722	BAU59411.1|cytochrome P450 94C79 [Fallopia sachalinensis]	AT2G27690 | CYP94C1 , cytochrome P450, family 94, subfamily C, polypeptide 1	C1
FtPinG0000864700.01	167.264	154.052	135.142	123.67	148.065	154.073	112.8	95.2811	125.716	45.9941	66.3537	73.1722	RAL39672.1|hypothetical protein DM860_003205 [Cuscuta australis]	AT2G15570 | ATHM3, ATM3, TRX-M3, GAT1 , Thioredoxin superfamily protein	C1
FtPinG0008659900.01	166.244	175.336	216.227	211.144	277.919	415.997	157.326	421.806	471.969	29.4362	27.8878	41.0208	XP_015877570.1|uncharacterized protein LOC107414004 [Ziziphus jujuba]	AT3G56290 | unknown protein; Has 39 Blast hits to 39 proteins in 15 species: Archae - 0; Bacteria - 0; Metazoa - 0; Fungi - 0; Plants - 39; Viruses - 0; Other Eukaryotes - 0 (source: NCBI BLink).	C1
FtPinG0001411000.01	166.244	104.391	159.167	53.2887	148.065	131.925	71.2419	54.5993	35.158	20.2374	32.696	25.4994	XP_002282438.1|PREDICTED: uncharacterized protein LOC100267696 isoform X1 [Vitis vinifera]	AT1G06460 | ACD32.1, ACD31.2 , alpha-crystallin domain 32.1	C1
FtPinG0007827100.01	164.204	178.376	184.193	68.3703	155.983	155.036	85.0944	77.0813	86.2968	59.7924	72.1235	128.606	KYP41775.1|Putative transporter arsB [Cajanus cajan]	AT1G02260 | Divalent ion symporter	C1
FtPinG0008225900.01	163.184	247.294	234.245	79.4303	117.977	207.035	65.305	122.045	197.098	135.223	73.0852	84.2588	XP_008375948.1|PREDICTED: probable carboxylesterase 12 [Malus domestica]	AT1G47480 | alpha/beta-Hydrolases superfamily protein	C1
FtPinG0009526200.01	162.164	143.917	224.235	15.0817	117.185	228.22	132.589	92.0694	189.64	46.914	30.7727	21.0647	XP_018020892.1|PREDICTED: mucin-1-like [Hyalella azteca]	-	C1
FtPinG0009714900.01	162.164	172.295	151.158	78.4248	102.141	114.592	95.9786	65.305	84.166	57.0327	88.4715	88.6935	KMS96624.1|hypothetical protein BVRB_8g201200 isoform B [Beta vulgaris subsp. vulgaris]	AT1G30680 | toprim domain-containing protein	C1
FtPinG0009362800.01	161.144	311.145	262.275	316.716	314.341	83.7771	98.947	61.0227	115.062	69.9111	168.288	93.1282	XP_021846586.1|GDSL esterase/lipase EXL3-like [Spinacia oleracea]	AT1G75900 | GDSL-like Lipase/Acylhydrolase superfamily protein	C1
FtPinG0003790100.01	161.144	93.2421	154.162	99.5392	121.936	87.6289	104.884	50.317	59.662	35.8754	73.0852	45.4554	XP_010248965.1|PREDICTED: uncharacterized protein LOC104591695 isoform X1 [Nelumbo nucifera]	AT3G27180 | S-adenosyl-L-methionine-dependent methyltransferases superfamily protein	C1
FtPinG0009170700.01	159.104	164.187	269.282	32.1743	108.475	321.627	92.0207	120.975	212.013	57.9526	47.1207	44.3468	XP_023337070.1|uncharacterized protein LOC111708052 [Eurytemora affinis]	-	C1
FtPinG0002438800.01	158.085	109.458	141.148	90.4902	83.1381	77.0364	88.0629	38.5407	74.5775	44.1544	31.7344	76.4982	KNA11738.1|hypothetical protein SOVF_131890, partial [Spinacia oleracea]	-	C1
FtPinG0007762000.01	157.065	170.268	162.17	73.3976	105.308	171.406	88.0629	130.61	232.256	88.3087	62.5071	88.6935	VDC62997.1|unnamed protein product [Brassica rapa]	AT3G59440 | Calcium-binding EF-hand family protein	C1
FtPinG0009332300.01	157.065	139.863	158.166	111.605	155.983	95.3326	124.673	100.634	106.539	72.6707	72.1235	82.0415	XP_002274005.1|PREDICTED: uncharacterized protein LOC100264616 [Vitis vinifera]	AT2G43540 | unknown protein; FUNCTIONS IN: molecular_function unknown; INVOLVED IN: N-terminal protein myristoylation; LOCATED IN: cellular_component unknown; EXPRESSED IN: 22 plant structures; EXPRESSED DURING: 13 growth stages; Has 27 Blast hits to 27 proteins in 12 species: Archae - 0; Bacteria - 0; Metazoa - 0; Fungi - 0; Plants - 27; Viruses - 0; Other Eukaryotes - 0 (source: NCBI BLink).	C1
FtPinG0006005400.01	156.045	152.025	143.15	21.1144	87.8888	242.665	77.1787	96.3517	223.732	52.4333	36.5426	46.5641	XP_010684190.2|PREDICTED: LOW QUALITY PROTEIN: plasma membrane-associated cation-binding protein 1 [Beta vulgaris subsp. vulgaris]	AT4G20260 | PCAP1 , plasma-membrane associated cation-binding protein 1	C1
FtPinG0009570600.01	155.025	183.444	178.187	81.4411	118.769	167.554	93.9997	79.2225	110.801	64.3918	49.044	57.6508	XP_009352576.1|PREDICTED: acid phosphatase 1 [Pyrus x bretschneideri]	AT4G29260 | HAD superfamily, subfamily IIIB acid phosphatase	C1
FtPinG0007518500.01	154.005	170.268	146.153	46.2505	146.481	127.11	152.378	102.775	143.828	58.8725	56.7372	110.867	PKI76112.1|hypothetical protein CRG98_003473 [Punica granatum]	AT4G15510 | Photosystem II reaction center PsbP family protein	C1
FtPinG0007517600.01	154.005	259.456	63.0661	16.0871	19.003	95.3326	41.5577	67.4462	122.52	76.3502	25.0028	18.8474	XP_023733055.1|protein yippee-like At4g27745 [Lactuca sativa]	AT4G27745 | Yippee family putative zinc-binding protein	C1
FtPinG0004061900.01	152.985	117.566	142.149	164.893	167.86	199.332	166.231	162.727	182.182	57.9526	68.277	68.7375	XP_010670652.1|PREDICTED: transcription factor HY5 [Beta vulgaris subsp. vulgaris]	AT5G11260 | HY5, TED 5 , Basic-leucine zipper (bZIP) transcription factor family protein	C1
FtPinG0002004900.01	149.925	252.362	238.25	50.2723	136.188	259.998	124.673	160.586	231.19	135.223	70.2003	100.889	XP_010669319.1|PREDICTED: uncharacterized protein LOC104886563 [Beta vulgaris subsp. vulgaris]	AT1G02180 | ferredoxin-related	C1
FtPinG0000403100.01	149.925	169.255	186.195	32.1743	103.725	219.554	112.8	102.775	187.509	65.3117	49.044	36.5861	XP_021858186.1|peroxidase 57-like [Spinacia oleracea]	AT5G22410 | RHS18 , root hair specific 18	C1
FtPinG0005515600.01	149.925	279.726	108.113	25.1362	35.6306	125.184	16.821	77.0813	154.482	57.9526	15.3864	21.0647	KNA11134.1|hypothetical protein SOVF_137610 [Spinacia oleracea]	AT5G28010 | Polyketide cyclase/dehydrase and lipid transport superfamily protein	C1
FtPinG0005391700.01	145.846	139.863	241.253	58.3159	117.977	181.036	105.873	95.2811	109.735	91.0684	85.5866	72.0635	XP_021858444.1|sugar transporter ERD6-like 7 isoform X1 [Spinacia oleracea]	AT2G48020 | Major facilitator superfamily protein	C1
FtPinG0005129800.01	144.826	155.066	154.162	101.55	163.901	137.703	83.1155	101.705	83.1006	75.4304	40.3892	65.4115	PIM99546.1|H+/oligopeptide symporter [Handroanthus impetiginosus]	AT1G12110 | NRT1.1, CHL1-1, NRT1, B-1, ATNRT1, CHL1 , nitrate transporter 1.1	C1
FtPinG0000134600.01	143.806	146.958	162.17	170.926	278.71	227.257	91.0313	153.092	164.07	34.0357	52.8906	55.4334	GAY44057.1|hypothetical protein CUMW_079350 [Citrus unshiu]	AT5G08530 | CI51 , 51 kDa subunit of complex I	C1
FtPinG0009810900.01	142.786	101.35	170.178	22.1198	84.7216	219.554	62.3366	78.1519	174.724	53.3532	20.1946	43.2381	XP_006413271.1|pathogenesis-related protein PR-1 [Eutrema salsugineum]	AT5G57625 | CAP (Cysteine-rich secretory proteins, Antigen 5, and Pathogenesis-related 1 protein) superfamily protein	C1
FtPinG0009101900.01	141.766	141.89	116.122	63.3431	86.3052	71.2587	52.4419	50.317	63.9236	37.7152	59.6221	58.7595	XP_022727277.1|LOW QUALITY PROTEIN: protein PLASTID REDOX INSENSITIVE 2-like [Durio zibethinus]	AT1G10522 | unknown protein; FUNCTIONS IN: molecular_function unknown; INVOLVED IN: biological_process unknown; LOCATED IN: chloroplast; EXPRESSED IN: 23 plant structures; EXPRESSED DURING: 13 growth stages; Has 24 Blast hits to 24 proteins in 8 species: Archae - 0; Bacteria - 0; Metazoa - 0; Fungi - 0; Plants - 24; Viruses - 0; Other Eukaryotes - 0 (source: NCBI BLink).	C1
FtPinG0005904300.01	140.746	79.0531	96.1007	72.3921	54.6336	61.6291	38.5893	38.5407	70.3159	15.638	10.5781	5.54334	XP_021718898.1|lysine-specific demethylase JMJ30-like [Chenopodium quinoa]	AT3G20810 | JMJD5 , 2-oxoglutarate (2OG) and Fe(II)-dependent oxygenase superfamily protein	C1
FtPinG0002388600.01	137.687	208.781	201.211	32.1743	123.519	240.739	185.031	115.622	198.163	67.1514	61.5454	53.2161	XP_012878486.1|PREDICTED: polypeptide N-acetylgalactosaminyltransferase 9 [Dipodomys ordii]	-	C1
FtPinG0008208000.01	137.687	135.809	136.143	40.2179	119.56	273.479	84.105	118.834	261.021	61.6321	37.5042	43.2381	XP_021862641.1|proline-rich protein 1-like [Spinacia oleracea]	AT2G47540 | Pollen Ole e 1 allergen and extensin family protein	C1
FtPinG0007288900.01	136.667	205.741	172.18	119.648	120.352	155.036	69.2629	122.045	148.09	91.0684	76.9318	80.9328	XP_024189503.1|cytokinin riboside 5'-monophosphate phosphoribohydrolase LOG7 [Rosa chinensis]	AT5G06300 | Putative lysine decarboxylase family protein	C1
FtPinG0005347700.01	135.647	147.971	265.278	107.583	162.317	177.184	62.3366	186.28	148.09	93.828	103.858	75.3895	PSS01314.1|GDSL esterase/lipase [Actinidia chinensis var. chinensis]	AT5G14450 | GDSL-like Lipase/Acylhydrolase superfamily protein	C1
FtPinG0000361400.01	133.607	208.781	125.131	74.403	83.1381	153.11	68.2734	125.257	133.174	99.3473	59.6221	69.8461	XP_009610464.1|PREDICTED: L-Ala-D/L-amino acid epimerase [Nicotiana tomentosiformis]	AT3G18270 | CYP77A5P , cytochrome P450, family 77, subfamily A, polypeptide 5 pseudogene	C1
FtPinG0008718500.01	130.547	157.093	159.167	74.403	147.273	124.221	113.789	73.8696	67.1197	49.6737	40.3892	58.7595	KNA24170.1|hypothetical protein SOVF_018200 [Spinacia oleracea]	AT3G52750 | FTSZ2-2 , Tubulin/FtsZ family protein	C1
FtPinG0006183500.01	129.527	170.268	90.0944	16.0871	41.9649	88.5919	32.6525	69.5873	120.389	63.4719	31.7344	18.8474	-	-	C1
FtPinG0002381100.01	126.468	149.998	198.208	32.1743	106.892	301.405	114.779	97.4223	240.779	47.8339	34.6193	67.6288	XP_023333238.1|von Willebrand factor A domain-containing protein 8-like [Eurytemora affinis]	-	C1
FtPinG0001569200.01	126.468	86.1476	134.141	167.91	219.326	102.073	73.2208	84.5754	71.3813	47.8339	32.696	55.4334	XP_021732420.1|uncharacterized acetyltransferase At3g50280-like [Chenopodium quinoa]	AT2G39980 | HXXXD-type acyl-transferase family protein	C1
FtPinG0002580200.01	122.388	60.81	126.132	121.659	95.8067	80.8882	104.884	77.0813	28.7656	40.4748	43.2741	16.63	XP_021850874.1|protein SUPPRESSOR OF PHYA-105 1-like isoform X2 [Spinacia oleracea]	AT2G46340 | SPA1 , SPA (suppressor of phyA-105) protein family	C1
FtPinG0005602100.01	119.328	1159.44	273.286	223.209	334.928	96.2955	97.9576	10.7057	1190.04	37.7152	79.8167	44.3468	PIN12321.1|hypothetical protein CDL12_15068 [Handroanthus impetiginosus]	-	C1
FtPinG0001484800.01	119.328	88.1746	122.128	109.594	88.6806	102.073	101.915	93.14	73.5121	55.1929	50.9673	44.3468	BAJ53183.1|JMS09K11.1, partial [Jatropha curcas]	AT1G21650 | SECA2 , Preprotein translocase SecA family protein	C1
FtPinG0005877900.01	117.289	141.89	173.181	43.2342	98.1821	175.258	83.1155	51.3876	122.52	45.0742	46.1591	25.4994	XP_010688270.1|PREDICTED: probable xyloglucan endotransglucosylase/hydrolase protein 26 [Beta vulgaris subsp. vulgaris]	AT4G28850 | XTH26, ATXTH26 , xyloglucan endotransglucosylase/hydrolase 26	C1
FtPinG0002162300.01	114.229	129.728	163.171	87.4738	154.399	131.925	46.5051	53.5287	55.4004	70.831	54.8139	65.4115	XP_010674873.1|PREDICTED: IAA-amino acid hydrolase ILR1-like 6 [Beta vulgaris subsp. vulgaris]	AT1G44350 | ILL6 , IAA-leucine resistant (ILR)-like gene 6	C1
FtPinG0001274400.01	114.229	127.701	151.158	50.2723	88.6806	126.147	68.2734	111.34	145.959	84.6292	48.0824	63.1941	XP_002316935.3|uncharacterized protein LOC7462365 [Populus trichocarpa]	AT5G54240 | Protein of unknown function (DUF1223)	C1
FtPinG0009278200.01	112.189	125.674	42.044	47.256	45.1321	124.221	110.821	119.904	206.686	43.2345	20.1946	29.9341	KMT13087.1|hypothetical protein BVRB_4g086280 [Beta vulgaris subsp. vulgaris]	-	C1
FtPinG0002381400.01	110.149	145.944	168.176	24.1307	85.5134	281.183	96.9681	99.5634	174.724	60.7122	32.696	60.9768	XP_019106208.1|PREDICTED: repetitive proline-rich cell wall protein 2-like [Beta vulgaris subsp. vulgaris]	-	C1
FtPinG0008251400.01	109.129	160.133	151.158	37.2015	86.3052	164.665	88.0629	100.634	136.37	74.5105	59.6221	62.0855	XP_015889638.1|acidic leucine-rich nuclear phosphoprotein 32 family member B [Ziziphus jujuba]	AT5G66230 | Chalcone-flavanone isomerase family protein	C1
FtPinG0008734100.01	109.129	104.391	114.12	31.1688	98.9739	99.1844	64.3156	41.7524	29.831	28.5164	49.044	53.2161	XP_002279580.1|PREDICTED: probable leucine-rich repeat receptor-like protein kinase At1g68400 [Vitis vinifera]	AT1G68400 | leucine-rich repeat transmembrane protein kinase family protein	C1
FtPinG0009760100.01	108.109	153.039	198.208	26.1416	71.2612	181.999	80.1471	111.34	140.632	33.1158	29.8111	24.3907	XP_006356969.1|PREDICTED: peroxidase 24-like [Solanum tuberosum]	AT1G05240 | Peroxidase superfamily protein	C1
FtPinG0009492000.01	106.07	155.066	138.145	82.4466	130.646	139.628	162.273	86.7165	64.989	60.7122	39.4275	77.6068	XP_009355075.1|PREDICTED: protein ZINC INDUCED FACILITATOR-LIKE 1-like [Pyrus x bretschneideri]	AT5G13750 | ZIFL1 , zinc induced facilitator-like 1	C1
FtPinG0005124100.01	106.07	78.0396	70.0734	87.4738	136.188	78.9623	62.3366	50.317	51.1389	20.2374	21.1562	16.63	XP_021277209.1|protein TIFY 10A [Herrania umbratica]	AT1G19180 | TIFY10A , jasmonate-zim-domain protein 1	C1
FtPinG0006474800.01	105.05	114.526	141.148	55.2995	58.5925	128.073	89.0523	129.539	170.463	70.831	46.1591	37.6947	-	-	C1
FtPinG0005130800.01	104.03	137.836	85.0891	19.1035	53.8418	89.5548	61.3472	77.0813	108.67	70.831	35.5809	27.7167	XP_021889853.1|putative GEM-like protein 8 [Carica papaya]	AT5G23350 | GRAM domain-containing protein / ABA-responsive protein-related	C1
FtPinG0008936400.01	103.01	104.391	301.316	50.2723	181.32	50.0737	95.9786	119.904	174.724	34.9555	83.6633	34.3687	OMO90944.1|hypothetical protein COLO4_18759 [Corchorus olitorius]	AT4G19810 | Glycosyl hydrolase family protein with chitinase insertion domain	C1
FtPinG0000998500.01	103.01	125.674	149.156	41.2233	131.437	105.925	113.789	68.5168	87.3622	40.4748	52.8906	45.4554	PNX93192.1|dentin sialophosphoprotein [Trifolium pratense]	AT4G37820 | unknown protein; BEST Arabidopsis thaliana protein match is: unknown protein (TAIR:AT2G22795.1); Has 433572 Blast hits to 177005 proteins in 4263 species: Archae - 2016; Bacteria - 67591; Metazoa - 157995; Fungi - 49745; Plants - 22011; Viruses - 2192; Other Eukaryotes - 132022 (source: NCBI BLink).	C1
FtPinG0006523000.01	101.99	120.607	161.169	30.1634	61.7597	172.369	64.3156	86.7165	110.801	40.4748	15.3864	33.2601	OVA12708.1|Plant peroxidase [Macleaya cordata]	AT5G17820 | Peroxidase superfamily protein	C1
FtPinG0006177600.01	100.97	95.2691	71.0745	139.757	69.6776	64.518	87.0734	70.6579	46.8773	28.5164	35.5809	45.4554	XP_021858445.1|sugar transporter ERD6-like 7 isoform X2 [Spinacia oleracea]	AT2G48020 | Major facilitator superfamily protein	C1
FtPinG0005109900.01	99.9502	212.835	117.123	40.2179	64.9269	129.036	51.4525	108.128	141.697	68.0713	75.0085	62.0855	XP_020888142.1|starch synthase 2, chloroplastic/amyloplastic [Arabidopsis lyrata subsp. lyrata]	AT3G01180 | AtSS2, SS2 , starch synthase 2	C1
FtPinG0002222900.01	98.9303	139.863	160.168	203.1	225.66	183.924	106.863	261.22	157.678	54.2731	57.6988	50.9988	XP_010670641.1|PREDICTED: lactation elevated protein 1 [Beta vulgaris subsp. vulgaris]	AT2G25530 | AFG1-like ATPase family protein	C1
FtPinG0001359200.01	97.9104	137.836	215.225	23.1253	73.6366	188.739	84.105	87.7871	154.482	52.4333	25.9645	44.3468	EOY26190.1|HXXXD-type acyl-transferase family protein, putative [Theobroma cacao]	AT1G32910 | HXXXD-type acyl-transferase family protein	C1
FtPinG0001880400.01	96.8905	174.322	189.198	72.3921	152.024	146.369	71.2419	63.1639	64.989	100.267	69.2386	86.4762	RDX80461.1|putative carbohydrate esterase, partial [Mucuna pruriens]	AT3G53010 | Domain of unknown function (DUF303)	C1
FtPinG0004819400.01	96.8905	90.2016	99.1038	57.3104	100.557	57.7773	85.0944	68.5168	55.4004	42.3146	55.7755	29.9341	XP_010669294.1|PREDICTED: pentatricopeptide repeat-containing protein At1g01970 [Beta vulgaris subsp. vulgaris]	AT1G01970 | Tetratricopeptide repeat (TPR)-like superfamily protein	C1
FtPinG0002517500.01	94.8507	82.0936	118.124	9.04902	44.3403	111.703	36.6104	54.5993	75.6429	26.6766	20.1946	22.1734	PPD98522.1|hypothetical protein GOBAR_DD04431 [Gossypium barbadense]	AT5G57625 | CAP (Cysteine-rich secretory proteins, Antigen 5, and Pathogenesis-related 1 protein) superfamily protein	C1
FtPinG0003431100.01	92.8109	42.567	77.0808	37.2015	79.1791	49.1107	50.463	26.7644	7.45775	20.2374	19.2329	21.0647	XP_019235725.1|PREDICTED: lysosomal Pro-X carboxypeptidase-like [Nicotiana attenuata]	AT5G65760 | Serine carboxypeptidase S28 family protein	C1
FtPinG0005516100.01	92.8109	160.133	77.0808	30.1634	50.6746	104.962	18.7999	51.3876	102.278	39.5549	10.5781	19.956	XP_021745404.1|MLP-like protein 43 [Chenopodium quinoa]	AT5G28010 | Polyketide cyclase/dehydrase and lipid transport superfamily protein	C1
FtPinG0005311600.01	91.791	85.1341	103.108	34.1852	57.8008	102.073	90.0418	71.7285	49.0081	27.5965	32.696	41.0208	XP_006426553.1|putative hydrolase C777.06c isoform X1 [Citrus clementina]	AT3G13800 | Metallo-hydrolase/oxidoreductase superfamily protein	C1
FtPinG0009194000.01	90.7711	88.1746	93.0975	51.2778	66.5105	79.9253	39.5788	40.6818	42.6157	54.2731	40.3892	42.1294	XP_021861203.1|uncharacterized protein LOC110800211 isoform X1 [Spinacia oleracea]	AT2G29510 | Protein of unknown function (DUF3527)	C1
FtPinG0008290900.01	89.7512	99.3231	118.124	17.0926	57.8008	95.3326	79.1576	63.1639	118.259	40.4748	38.4659	47.6728	-	-	C1
FtPinG0008526200.01	88.7313	105.404	77.0808	81.4411	62.5515	109.777	57.3893	52.4581	88.4276	49.6737	50.9673	29.9341	XP_021835719.1|single-stranded DNA-binding protein, mitochondrial [Spinacia oleracea]	AT4G11060 | MTSSB , mitochondrially targeted single-stranded DNA binding protein	C1
FtPinG0007883800.01	87.7114	86.1476	141.148	21.1144	78.3873	139.628	115.768	120.975	171.528	58.8725	29.8111	44.3468	XP_022760636.1|COBRA-like protein 7 [Durio zibethinus]	AT4G16120 | ATSEB1, COBL7, SEB1 , COBRA-like protein-7 precursor	C1
FtPinG0008352100.01	87.7114	68.9181	66.0692	38.207	60.9679	69.3328	42.5472	37.4701	60.7274	24.8368	32.696	37.6947	XP_023906614.1|pentatricopeptide repeat-containing protein At2g15690, mitochondrial-like [Quercus suber]	AT2G15690 | Tetratricopeptide repeat (TPR)-like superfamily protein	C1
FtPinG0000197500.01	84.6517	143.917	75.0787	13.0708	34.047	124.221	139.515	116.693	103.343	37.7152	20.1946	31.0427	PIA62705.1|hypothetical protein AQUCO_00200612v1 [Aquilegia coerulea]	AT1G14220 | Ribonuclease T2 family protein	C1
FtPinG0005926100.01	83.6318	83.1071	88.0923	38.207	60.1761	48.1478	28.6946	40.6818	39.4195	30.3561	70.2003	23.282	XP_016696474.1|PREDICTED: COBRA-like protein 4 [Gossypium hirsutum]	AT5G15630 | COBL4, IRX6 , COBRA-like extracellular glycosyl-phosphatidyl inositol-anchored protein family	C1
FtPinG0008951200.01	82.6119	311.145	142.149	80.4357	53.8418	128.073	65.305	49.2464	110.801	32.1959	81.74	60.9768	XP_021757527.1|bidirectional sugar transporter SWEET4-like [Chenopodium quinoa]	AT4G10850 | SWEET7, AtSWEET7 , Nodulin MtN3 family protein	C1
FtPinG0001851300.01	82.6119	48.648	34.0357	42.2287	40.3813	53.9255	19.7894	27.8349	30.8964	11.9585	9.61647	24.3907	XP_011020237.1|PREDICTED: protein SRG1-like [Populus euphratica]	AT5G20400 | 2-oxoglutarate (2OG) and Fe(II)-dependent oxygenase superfamily protein	C1
FtPinG0005830100.01	81.592	117.566	56.0587	26.1416	47.5075	53.9255	73.2208	25.6938	85.2314	48.7538	30.7727	31.0427	XP_010695999.1|PREDICTED: cytochrome P450 71A1-like [Beta vulgaris subsp. vulgaris]	AT1G13080 | CYP71B2 , cytochrome P450, family 71, subfamily B, polypeptide 2	C1
FtPinG0009170900.01	80.5721	92.2286	174.182	13.0708	61.7597	139.628	40.5683	38.5407	92.6892	20.2374	23.0795	23.282	XP_012878486.1|PREDICTED: polypeptide N-acetylgalactosaminyltransferase 9 [Dipodomys ordii]	-	C1
FtPinG0000926500.01	80.5721	82.0936	119.125	24.1307	64.9269	132.888	43.5367	48.1758	77.7737	27.5965	22.1179	22.1734	OMP06007.1|Pollen Ole e 1 allergen/extensin [Corchorus olitorius]	AT2G47540 | Pollen Ole e 1 allergen and extensin family protein	C1
FtPinG0002388400.01	78.5323	83.1071	129.135	19.1035	62.5515	130.962	58.3787	66.3756	108.67	18.3976	17.3097	33.2601	-	-	C1
FtPinG0001872700.01	78.5323	96.2826	116.122	15.0817	50.6746	100.147	38.5893	50.317	87.3622	27.5965	16.348	21.0647	XP_006375124.2|plasma membrane ATPase 1 [Populus trichocarpa]	AT3G60330 | HA7 , H(+)-ATPase 7	C1
FtPinG0001825500.01	77.5124	56.756	70.0734	33.1797	59.3843	42.37	24.7368	12.8469	5.32696	8.27894	6.73153	8.86935	XP_022766539.1|protein FD-like [Durio zibethinus]	AT4G35900 | FD, FD-1, atbzip14 , Basic-leucine zipper (bZIP) transcription factor family protein	C1
FtPinG0006567800.01	76.4925	121.62	113.119	25.1362	84.7216	213.776	77.1787	115.622	147.024	47.8339	21.1562	29.9341	XP_021756595.1|GDSL esterase/lipase EXL3-like [Chenopodium quinoa]	AT1G75900 | GDSL-like Lipase/Acylhydrolase superfamily protein	C1
FtPinG0009172600.01	75.4726	71.9586	118.124	21.1144	61.7597	138.666	50.463	59.9522	139.566	32.1959	20.1946	46.5641	XP_001618217.1|hypothetical protein NEMVEDRAFT_v1g68325 [Nematostella vectensis]	-	C1
FtPinG0007789500.01	75.4726	78.0396	74.0776	16.0871	15.044	52.9625	26.7157	25.6938	51.1389	41.3947	7.69318	18.8474	XP_012083802.1|uncharacterized protein LOC105643310 [Jatropha curcas]	AT2G47360 | unknown protein; BEST Arabidopsis thaliana protein match is: unknown protein (TAIR:AT1G02570.1); Has 58 Blast hits to 55 proteins in 6 species: Archae - 0; Bacteria - 0; Metazoa - 0; Fungi - 0; Plants - 58; Viruses - 0; Other Eukaryotes - 0 (source: NCBI BLink).	C1
FtPinG0008740900.01	75.4726	91.2151	70.0734	18.098	41.9649	84.74	35.6209	44.9641	56.4658	42.3146	8.65483	21.0647	XP_002533739.1|indole-3-acetic acid-amido synthetase GH3.6 [Ricinus communis]	AT4G27260 | GH3.5, WES1 , Auxin-responsive GH3 family protein	C1
FtPinG0001871300.01	73.4328	42.567	43.0451	7.03812	43.5485	19.2591	21.7683	2.14115	12.7847	4.59941	2.88494	17.7387	XP_010058501.1|PREDICTED: phospholipase A(1) DAD1, chloroplastic [Eucalyptus grandis]	AT2G44810 | DAD1 , alpha/beta-Hydrolases superfamily protein	C1
FtPinG0004196700.01	72.4129	61.8235	75.0787	8.04357	54.6336	51.9996	29.6841	34.2584	56.4658	19.3175	22.1179	27.7167	KOB76333.1|putative Interspersed repeat antigen, partial [Operophtera brumata]	-	C1
FtPinG0003174300.01	72.4129	31.4185	61.064	50.2723	59.3843	36.5923	29.6841	39.6112	39.4195	20.2374	24.0412	12.1954	XP_021801560.1|pentatricopeptide repeat-containing protein At3g46790, chloroplastic isoform X2 [Prunus avium]	AT3G46790 | CRR2 , Tetratricopeptide repeat (TPR)-like superfamily protein	C1
FtPinG0003544400.01	72.4129	57.7695	46.0482	28.1525	62.5515	80.8882	31.663	51.3876	82.0352	27.5965	24.0412	21.0647	GAV72779.1|Myb_DNA-binding domain-containing protein [Cephalotus follicularis]	AT1G22640 | ATMYB3, MYB3 , myb domain protein 3	C1
FtPinG0003976900.01	70.3731	94.2556	132.138	29.1579	96.5985	177.184	67.284	65.305	204.555	58.8725	15.3864	34.3687	-	-	C1
FtPinG0000228200.01	70.3731	121.62	80.0839	40.2179	71.2612	136.74	36.6104	47.1053	74.5775	19.3175	11.5398	19.956	XP_023912287.1|cationic peroxidase 1-like [Quercus suber]	AT5G05340 | Peroxidase superfamily protein	C1
FtPinG0002672900.01	70.3731	87.1611	69.0724	26.1416	74.4284	127.11	58.3787	84.5754	88.4276	30.3561	26.9261	48.7814	PQP91598.1|basic blue protein-like [Prunus yedoensis var. nudiflora]	AT2G02850 | ARPN , plantacyanin	C1
FtPinG0007567300.01	68.3333	81.0801	83.087	88.4793	95.8067	259.998	154.357	163.798	241.844	99.3473	23.0795	36.5861	XP_021861234.1|peroxidase 57-like [Spinacia oleracea]	AT5G17820 | Peroxidase superfamily protein	C1
FtPinG0002530000.01	66.2935	53.7155	55.0577	74.403	68.8858	57.7773	43.5367	25.6938	38.3541	22.0772	16.348	18.8474	XP_020538288.1|U-box domain-containing protein 33 isoform X7 [Jatropha curcas]	AT2G45910 | U-box domain-containing protein kinase family protein	C1
FtPinG0008005800.01	65.2736	85.1341	165.173	45.2451	60.1761	87.6289	4.94735	43.8935	25.5694	13.7982	43.2741	33.2601	XP_007051445.2|PREDICTED: probable L-gulonolactone oxidase 6 [Theobroma cacao]	AT2G46760 | D-arabinono-1,4-lactone oxidase family protein	C1
FtPinG0002110600.01	65.2736	104.391	150.157	55.2995	67.3022	113.629	33.642	39.6112	52.2042	36.7953	13.4631	49.8901	ALS46606.1|chalcone synthase 3 [Fagopyrum tataricum]	AT5G13930 | CHS, TT4, ATCHS , Chalcone and stilbene synthase family protein	C1
FtPinG0008836700.01	65.2736	99.3231	128.134	37.2015	72.8448	95.3326	62.3366	69.5873	78.8391	45.0742	24.0412	27.7167	XP_021619870.1|glutathione S-transferase T1-like [Manihot esculenta]	AT5G41210 | ATGSTT1, GST10, GSTT1 , glutathione S-transferase THETA 1	C1
FtPinG0008706800.01	65.2736	102.364	71.0745	21.1144	46.7157	96.2955	57.3893	62.0933	77.7737	44.1544	22.1179	34.3687	XP_021866293.1|G2/mitotic-specific cyclin S13-7-like isoform X2 [Spinacia oleracea]	AT5G06150 | CYC1BAT, CYCB1;2 , Cyclin family protein	C1
FtPinG0003365000.01	65.2736	64.8641	47.0493	39.2124	22.9619	45.2589	23.7473	52.4581	66.0544	30.3561	24.0412	26.6081	XP_021849839.1|single-stranded DNA-binding protein, mitochondrial [Spinacia oleracea]	AT3G18580 | Nucleic acid-binding, OB-fold-like protein	C1
FtPinG0002388700.01	64.2537	56.756	89.0933	7.03812	53.8418	80.8882	35.6209	35.329	68.1851	20.2374	3.84659	23.282	XP_001622895.1|predicted protein [Nematostella vectensis]	-	C1
FtPinG0008616100.01	64.2537	18.243	36.0378	31.1688	28.5045	16.3702	19.7894	4.2823	3.19618	7.35906	12.5014	14.4127	PON75596.1|Octamer-binding transcription factor [Parasponia andersonii]	AT3G46640 | PCL1, LUX , Homeodomain-like superfamily protein	C1
FtPinG0005574300.01	63.2338	345.604	92.0965	26.1416	68.8858	333.182	178.105	102.775	256.76	49.6737	24.0412	36.5861	-	-	C1
FtPinG0007830700.01	63.2338	44.594	81.0849	6.03268	28.5045	79.9253	33.642	35.329	67.1197	9.19882	10.5781	8.86935	XP_014388479.1|PREDICTED: dynein heavy chain-like [Myotis brandtii]	-	C1
FtPinG0002102100.01	63.2338	91.2151	77.0808	34.1852	91.056	77.9994	64.3156	53.5287	53.2696	23.9169	33.6577	42.1294	NP_001304540.2|uncharacterized protein LOC100800943 precursor [Glycine max]	AT2G40316 | FUNCTIONS IN: molecular_function unknown; LOCATED IN: endomembrane system; EXPRESSED IN: 22 plant structures; EXPRESSED DURING: 13 growth stages; CONTAINS InterPro DOMAIN/s: Autophagy-related protein 27 (InterPro:IPR018939); Has 138 Blast hits to 138 proteins in 57 species: Archae - 0; Bacteria - 0; Metazoa - 32; Fungi - 62; Plants - 33; Viruses - 0; Other Eukaryotes - 11 (source: NCB…	C1
FtPinG0000385000.01	62.2139	79.0531	111.116	12.0654	39.5896	76.0735	25.7262	27.8349	66.0544	13.7982	8.65483	5.54334	XP_010675451.1|PREDICTED: DNA-directed RNA polymerase II subunit RPB1 isoform X1 [Beta vulgaris subsp. vulgaris]	AT2G47540 | Pollen Ole e 1 allergen and extensin family protein	C1
FtPinG0006188000.01	61.194	248.308	149.156	27.147	70.4694	267.702	135.557	50.317	156.613	77.2701	48.0824	26.6081	XP_020206542.1|gibberellin-regulated protein 11-like [Cajanus cajan]	AT4G09600 | GASA3 , GAST1 protein homolog 3	C1
FtPinG0005410800.01	61.194	99.3231	140.147	40.2179	53.05	194.517	43.5367	66.3756	127.847	44.1544	4.80824	29.9341	XP_021301222.1|probable 2-oxoglutarate-dependent dioxygenase At3g50210 [Herrania umbratica]	AT3G50210 | 2-oxoglutarate (2OG) and Fe(II)-dependent oxygenase superfamily protein	C1
FtPinG0005965000.01	60.1741	28.378	72.0755	6.03268	12.6687	63.555	11.8736	13.9175	45.8119	12.8784	10.5781	6.65201	XP_006482397.1|non-specific lipid-transfer protein 2-like [Citrus sinensis]	AT3G18280 | Bifunctional inhibitor/lipid-transfer protein/seed storage 2S albumin superfamily protein	C1
FtPinG0003297400.01	60.1741	23.3105	31.0325	27.147	30.8799	25.9998	27.7052	16.0586	17.0463	12.8784	6.73153	4.43468	-	-	C1
FtPinG0004121800.01	58.1343	56.756	113.119	5.02723	38.7978	101.11	22.7578	25.6938	45.8119	19.3175	10.5781	15.5214	XP_021716352.1|repetitive proline-rich cell wall protein 1-like [Chenopodium quinoa]	AT3G22142 | Bifunctional inhibitor/lipid-transfer protein/seed storage 2S albumin superfamily protein	C1
FtPinG0007190100.01	57.1144	39.5265	191.2	6.03268	12.6687	38.5182	1.97894	9.63517	10.6539	0.919882	3.84659	7.76068	PSS34360.1|Pectinesterase inhibitor domain protein [Actinidia chinensis var. chinensis]	AT5G62360 | Plant invertase/pectin methylesterase inhibitor superfamily protein	C1
FtPinG0007321400.01	57.1144	18.243	46.0482	87.4738	53.05	42.37	29.6841	26.7644	28.7656	6.43918	12.5014	14.4127	XP_019106732.1|PREDICTED: glucose-1-phosphate adenylyltransferase large subunit, chloroplastic/amyloplastic isoform X1 [Beta vulgaris subsp. vulgaris]	AT1G27680 | APL2 , ADPGLC-PPase large subunit	C1
FtPinG0005373900.01	57.1144	45.6075	42.044	42.2287	87.097	76.0735	22.7578	80.2931	30.8964	12.8784	14.4247	7.76068	XP_010028757.1|PREDICTED: uncharacterized protein LOC104418968 isoform X1 [Eucalyptus grandis]	AT5G05320 | FAD/NAD(P)-binding oxidoreductase family protein	C1
FtPinG0004911500.01	55.0746	23.3105	59.0619	53.2887	30.8799	26.9627	11.8736	21.4115	41.5503	4.59941	1.92329	1.10867	XP_018835239.1|PREDICTED: lysine-specific demethylase JMJ30-like [Juglans regia]	AT3G20810 | JMJD5 , 2-oxoglutarate (2OG) and Fe(II)-dependent oxygenase superfamily protein	C1
FtPinG0003923000.01	55.0746	100.337	44.0461	12.0654	22.9619	35.6293	10.8842	29.9761	36.2234	15.638	6.73153	19.956	XP_021644532.1|uncharacterized protein LOC110638321 isoform X2 [Hevea brasiliensis]	AT5G20140 | SOUL heme-binding family protein	C1
FtPinG0009444400.01	55.0746	120.607	9.00944	4.02179	4.75075	34.6664	5.93682	13.9175	6.39236	34.9555	5.76988	0	XP_012072799.2|cytochrome P450 724B1 [Jatropha curcas]	AT5G14400 | CYP724A1 , cytochrome P450, family 724, subfamily A, polypeptide 1	C1
FtPinG0001848300.01	54.0547	33.4455	44.0461	4.02179	23.7537	62.5921	7.91576	25.6938	38.3541	11.9585	9.61647	3.32601	RCV04932.1|hypothetical protein SETIT_1G040900v2 [Setaria italica]	-	C1
FtPinG0004081100.01	52.0149	85.1341	135.142	13.0708	30.0881	46.2218	43.5367	32.1172	82.0352	53.3532	14.4247	19.956	XP_023913564.1|probable acetyltransferase NATA1-like [Quercus suber]	AT2G39020 | Acyl-CoA N-acyltransferases (NAT) superfamily protein	C1
FtPinG0006790700.01	52.0149	51.6885	37.0388	36.1961	39.5896	49.1107	29.6841	37.4701	29.831	12.8784	23.0795	19.956	KNA20946.1|hypothetical protein SOVF_047740 [Spinacia oleracea]	AT3G13740 | Ribonuclease III family protein	C1
FtPinG0007428200.01	50.995	77.0261	73.0766	10.0545	41.1731	77.9994	62.3366	58.8816	90.5584	37.7152	25.9645	21.0647	XP_021277516.1|long chain acyl-CoA synthetase 4-like [Herrania umbratica]	AT4G23850 | LACS4 , AMP-dependent synthetase and ligase family protein	C1
FtPinG0008083800.01	49.9751	95.2691	54.0566	14.0762	25.3373	51.9996	22.7578	25.6938	49.0081	34.9555	12.5014	8.86935	CBI29312.3|unnamed protein product, partial [Vitis vinifera]	AT5G09360 | LAC14 , laccase 14	C1
FtPinG0007544000.01	49.9751	118.58	47.0493	2.01089	7.12612	51.0366	75.1997	42.823	126.782	14.7181	7.69318	6.65201	XP_010278802.1|PREDICTED: urea-proton symporter DUR3-like [Nelumbo nucifera]	AT5G45380 | ATDUR3, DUR3 , solute:sodium symporters;urea transmembrane transporters	C1
FtPinG0002829400.01	49.9751	37.4995	44.0461	14.0762	19.7948	61.6291	43.5367	35.329	72.4467	22.0772	10.5781	5.54334	GAV72919.1|SUI1 domain-containing protein, partial [Cephalotus follicularis]	AT5G54940 | Translation initiation factor SUI1 family protein	C1
FtPinG0001540600.01	49.9751	124.661	38.0399	71.3867	68.8858	35.6293	21.7683	16.0586	19.1771	6.43918	10.5781	21.0647	EOY03753.1|Malectin/receptor-like protein kinase family protein, putative [Theobroma cacao]	AT3G04690 | ANX1 , Malectin/receptor-like protein kinase family protein	C1
FtPinG0000700900.01	49.9751	41.5535	36.0378	21.1144	51.4664	25.9998	56.3998	31.0467	13.8501	16.5579	14.4247	18.8474	-	-	C1
FtPinG0006770100.01	48.9552	56.756	66.0692	17.0926	107.684	187.776	90.0418	152.022	237.583	84.6292	4.80824	37.6947	XP_019266729.1|PREDICTED: aquaporin PIP2-3-like [Nicotiana attenuata]	AT2G37170 | PIP2B, PIP2;2 , plasma membrane intrinsic protein 2	C1
FtPinG0009168800.01	47.9353	35.4725	91.0954	5.02723	38.006	73.1846	18.7999	33.1878	70.3159	11.9585	15.3864	15.5214	XP_012878486.1|PREDICTED: polypeptide N-acetylgalactosaminyltransferase 9 [Dipodomys ordii]	-	C1
FtPinG0009003700.01	47.9353	48.648	71.0745	2.01089	26.9209	51.9996	12.8631	25.6938	55.4004	22.9971	5.76988	9.97802	PLY76106.1|hypothetical protein LSAT_9X27740 [Lactuca sativa]	-	C1
FtPinG0005365400.01	47.9353	26.351	46.0482	49.2669	52.2582	41.4071	34.6315	43.8935	35.158	11.9585	14.4247	15.5214	KOM33794.1|hypothetical protein LR48_Vigan01g335000 [Vigna angularis]	AT1G11800 | endonuclease/exonuclease/phosphatase family protein	C1
FtPinG0006523700.01	46.9154	81.0801	77.0808	10.0545	56.2172	107.851	67.284	52.4581	62.8582	22.0772	20.1946	17.7387	OVA12708.1|Plant peroxidase [Macleaya cordata]	AT5G17820 | Peroxidase superfamily protein	C1
FtPinG0002506200.01	45.8955	158.106	147.154	2.01089	67.3022	246.517	36.6104	47.1053	69.2505	29.4362	20.1946	34.3687	XP_021755951.1|deoxyhypusine synthase-like isoform X1 [Chenopodium quinoa]	AT5G05920 | DHS, EDA22 , deoxyhypusine synthase	C1
FtPinG0009172700.01	45.8955	36.486	64.0671	5.02723	26.1291	83.7771	22.7578	22.4821	41.5503	10.1187	3.84659	7.76068	XP_021856788.1|repetitive proline-rich cell wall protein 1-like [Spinacia oleracea]	-	C1
FtPinG0006709800.01	45.8955	80.0666	56.0587	15.0817	53.8418	51.0366	21.7683	17.1292	22.3732	13.7982	9.61647	19.956	XP_021770818.1|uncharacterized protein LOC110735007 [Chenopodium quinoa]	AT4G02340 | alpha/beta-Hydrolases superfamily protein	C1
FtPinG0008523800.01	45.8955	120.607	20.021	17.0926	19.7948	4.81478	12.8631	10.7057	51.1389	15.638	2.88494	6.65201	XP_021722089.1|uncharacterized protein LOC110689628 [Chenopodium quinoa]	AT3G19430 | late embryogenesis abundant protein-related / LEA protein-related	C1
FtPinG0009138400.01	44.8756	52.702	34.0357	57.3104	50.6746	25.0368	13.8526	6.42345	14.9155	14.7181	16.348	8.86935	XP_010267625.1|PREDICTED: calcineurin B-like protein 7 [Nelumbo nucifera]	AT5G24270 | SOS3, CBL4, ATSOS3 , Calcium-binding EF-hand family protein	C1
FtPinG0003054000.01	43.8557	67.9046	94.0986	10.0545	34.047	29.8516	72.2313	47.1053	90.5584	29.4362	13.4631	29.9341	OVA06379.1|Arabinogalactan peptide [Macleaya cordata]	AT3G61640 | AGP20, AtAGP20 , arabinogalactan protein 20	C1
FtPinG0009229300.01	41.8159	54.729	56.0587	30.1634	52.2582	75.1105	107.852	100.634	106.539	44.1544	8.65483	17.7387	XP_010685870.1|PREDICTED: putative respiratory burst oxidase homolog protein H [Beta vulgaris subsp. vulgaris]	AT5G60010 | ferric reductase-like transmembrane component family protein	C1
FtPinG0001966200.01	41.8159	26.351	48.0503	6.03268	27.7127	40.4441	17.8105	27.8349	44.7465	14.7181	10.5781	7.76068	XP_010688721.1|PREDICTED: endoglucanase 5 [Beta vulgaris subsp. vulgaris]	AT1G48930 | AtGH9C1, GH9C1 , glycosyl hydrolase 9C1	C1
FtPinG0004121200.01	39.7761	72.9721	81.0849	9.04902	45.9239	101.11	50.463	38.5407	64.989	11.9585	9.61647	17.7387	XP_021716748.1|repetitive proline-rich cell wall protein 2-like [Chenopodium quinoa]	AT3G22142 | Bifunctional inhibitor/lipid-transfer protein/seed storage 2S albumin superfamily protein	C1
FtPinG0000904300.01	39.7761	70.9451	57.0598	59.3213	74.4284	125.184	124.673	140.245	199.228	53.3532	36.5426	43.2381	XP_021720322.1|B-box zinc finger protein 32-like [Chenopodium quinoa]	AT3G21150 | BBX32 , B-box 32	C1
FtPinG0002648800.01	38.7562	44.594	51.0535	3.01634	27.7127	110.74	10.8842	14.988	22.3732	14.7181	9.61647	8.86935	XP_010685329.1|PREDICTED: high-affinity nitrate transporter 2.1 [Beta vulgaris subsp. vulgaris]	AT5G60770 | ATNRT2.4, NRT2.4 , nitrate transporter 2.4	C1
FtPinG0000051400.01	38.7562	77.0261	49.0514	33.1797	41.9649	98.2214	25.7262	53.5287	45.8119	20.2374	13.4631	22.1734	XP_021851877.1|GDT1-like protein 4 [Spinacia oleracea]	AT5G36290 | Uncharacterized protein family (UPF0016)	C1
FtPinG0001540200.01	38.7562	48.648	13.0136	17.0926	27.7127	17.3332	8.90523	7.49402	3.19618	7.35906	10.5781	12.1954	XP_024444504.1|receptor-like protein kinase FERONIA [Populus trichocarpa]	AT3G51550 | FER , Malectin/receptor-like protein kinase family protein	C1
FtPinG0008157100.01	37.7363	54.729	61.064	14.0762	30.0881	47.1848	22.7578	25.6938	22.3732	20.2374	6.73153	23.282	AXQ39827.1|UDP glycosyltransferase [Panax ginseng]	AT2G18570 | UDP-Glycosyltransferase superfamily protein	C1
FtPinG0009003300.01	37.7363	44.594	51.0535	8.04357	21.3784	43.333	4.94735	13.9175	40.4849	7.35906	4.80824	8.86935	PLY76106.1|hypothetical protein LSAT_9X27740 [Lactuca sativa]	-	C1
FtPinG0008695100.01	37.7363	38.513	46.0482	29.1579	54.6336	77.9994	28.6946	39.6112	38.3541	12.8784	3.84659	18.8474	KVI03656.1|hypothetical protein Ccrd_018036 [Cynara cardunculus var. scolymus]	AT2G29660 | zinc finger (C2H2 type) family protein	C1
FtPinG0004524900.01	37.7363	29.3915	20.021	11.0599	24.5455	30.8146	11.8736	16.0586	22.3732	11.0386	6.73153	5.54334	XP_019266842.1|PREDICTED: rapid alkalinization factor [Nicotiana attenuata]	AT4G15800 | RALFL33 , ralf-like 33	C1
FtPinG0005878100.01	36.7164	37.4995	72.0755	11.0599	15.8358	54.8884	20.7789	26.7644	40.4849	13.7982	3.84659	8.86935	XP_010688270.1|PREDICTED: probable xyloglucan endotransglucosylase/hydrolase protein 26 [Beta vulgaris subsp. vulgaris]	AT4G28850 | XTH26, ATXTH26 , xyloglucan endotransglucosylase/hydrolase 26	C1
FtPinG0006651300.01	35.6965	43.5805	71.0745	9.04902	21.3784	10.5925	14.8421	19.2703	20.2425	2.75965	4.80824	37.6947	XP_021770841.1|sugar transporter ERD6-like 16 [Chenopodium quinoa]	AT5G18840 | Major facilitator superfamily protein	C1
FtPinG0006523500.01	35.6965	38.513	64.0671	7.03812	26.1291	74.1475	17.8105	32.1172	39.4195	9.19882	4.80824	12.1954	XP_021843637.1|peroxidase 57-like [Spinacia oleracea]	AT5G17820 | Peroxidase superfamily protein	C1
FtPinG0000369800.01	35.6965	33.4455	40.0419	36.1961	39.5896	65.4809	111.81	107.057	87.3622	58.8725	25.9645	11.0867	PWA89210.1|pectin lyase-like superfamily protein [Artemisia annua]	AT3G07010 | Pectin lyase-like superfamily protein	C1
FtPinG0007158900.01	35.6965	41.5535	37.0388	45.2451	25.3373	24.0739	18.7999	13.9175	27.7002	11.9585	8.65483	16.63	PON63031.1|Anthranilate synthase component I [Parasponia andersonii]	AT2G29690 | ASA2, ATHANSYNAB , anthranilate synthase 2	C1
FtPinG0001216400.01	35.6965	26.351	31.0325	5.02723	9.50149	25.9998	12.8631	12.8469	37.2887	2.75965	2.88494	8.86935	XP_021861236.1|peroxidase 57-like [Spinacia oleracea]	AT5G22410 | RHS18 , root hair specific 18	C1
FtPinG0009566400.01	34.6766	45.6075	47.0493	1.00545	27.7127	50.0737	10.8842	28.9055	25.5694	11.0386	8.65483	8.86935	XP_008223670.1|PREDICTED: pathogenesis-related protein PR-1-like [Prunus mume]	AT4G30320 | CAP (Cysteine-rich secretory proteins, Antigen 5, and Pathogenesis-related 1 protein) superfamily protein	C1
FtPinG0002543000.01	33.6567	3.0405	36.0378	5.02723	3.16716	7.70364	2.96841	1.07057	1.06539	11.0386	0	0	ACU22762.1|unknown [Glycine max]	AT1G77120 | ADH1, ADH, ATADH, ATADH1 , alcohol dehydrogenase 1	C1
FtPinG0009724100.01	33.6567	27.3645	29.0304	12.0654	27.7127	22.148	10.8842	13.9175	24.504	4.59941	11.5398	9.97802	XP_012447174.1|PREDICTED: putative cyclic nucleotide-gated ion channel 15 [Gossypium raimondii]	AT2G28260 | ATCNGC15, CNGC15 , cyclic nucleotide-gated channel 15	C1
FtPinG0007518100.01	32.6368	21.2835	27.0283	9.04902	14.2522	8.6666	1.97894	6.42345	14.9155	4.59941	3.84659	3.32601	XP_008370366.2|PREDICTED: pentatricopeptide repeat-containing protein At3g62890-like [Malus domestica]	AT1G08070 | OTP82 , Tetratricopeptide repeat (TPR)-like superfamily protein	C1
FtPinG0000412300.01	30.597	40.54	19.0199	3.01634	0.791791	16.3702	2.96841	6.42345	10.6539	0.919882	8.65483	0	XP_010679326.1|PREDICTED: protein CUP-SHAPED COTYLEDON 3 [Beta vulgaris subsp. vulgaris]	AT1G56010 | NAC1, ANAC022 , NAC domain containing protein 1	C1
FtPinG0001414300.01	29.5771	41.5535	41.043	1.00545	6.33433	38.5182	19.7894	10.7057	22.3732	13.7982	13.4631	1.10867	XP_021860426.1|acyl-coenzyme A oxidase 3, peroxisomal-like isoform X1 [Spinacia oleracea]	AT1G06290 | ACX3, ATACX3 , acyl-CoA oxidase 3	C1
FtPinG0001825400.01	29.5771	33.4455	32.0336	28.1525	26.1291	35.6293	12.8631	11.7763	15.9809	6.43918	11.5398	5.54334	XP_021620374.1|probable S-sulfocysteine synthase, chloroplastic isoform X1 [Manihot esculenta]	AT3G03630 | CS26 , cysteine synthase 26	C1
FtPinG0008632100.01	29.5771	31.4185	18.0189	6.03268	12.6687	13.4814	9.8947	8.56459	5.32696	4.59941	3.84659	11.0867	XP_023923169.1|transcription factor bHLH71-like [Quercus suber]	AT1G72210 | basic helix-loop-helix (bHLH) DNA-binding superfamily protein	C1
FtPinG0009367800.01	28.5572	19.2565	53.0556	16.0871	27.7127	43.333	29.6841	17.1292	30.8964	3.67953	6.73153	14.4127	XP_023900301.1|auxin-induced protein 6B-like [Quercus suber]	AT5G10990 | SAUR-like auxin-responsive protein family	C1
FtPinG0001832800.01	25.4975	32.432	49.0514	1.00545	11.8769	34.6664	7.91576	5.35287	15.9809	6.43918	1.92329	1.10867	NP_001310380.1|2-isopropylmalate synthase A precursor [Solanum pennellii]	AT1G74040 | IMS1, MAML-3, IPMS2 , 2-isopropylmalate synthase 1	C1
FtPinG0008843700.01	25.4975	32.432	40.0419	5.02723	15.8358	52.9625	8.90523	13.9175	24.504	1.83976	8.65483	12.1954	CBI36890.3|unnamed protein product, partial [Vitis vinifera]	AT4G02270 | RHS13 , root hair specific 13	C1
FtPinG0002393900.01	24.4776	95.2691	35.0367	23.1253	40.3813	83.7771	46.5051	20.3409	31.9618	15.638	17.3097	11.0867	OVA17643.1|hypothetical protein BVC80_1835g10 [Macleaya cordata]	AT1G07290 | GONST2 , golgi nucleotide sugar transporter 2	C1
FtPinG0001540800.01	24.4776	20.27	20.021	16.0871	23.7537	10.5925	7.91576	3.21172	6.39236	7.35906	1.92329	2.21734	XP_027097000.1|receptor-like protein kinase FERONIA [Coffea arabica]	AT5G38990 | Malectin/receptor-like protein kinase family protein	C1
FtPinG0006470900.01	23.4577	27.3645	17.0178	3.01634	37.2142	31.7775	22.7578	6.42345	8.52314	0	0.961647	0	XP_018851077.1|PREDICTED: (3S,6E)-nerolidol synthase 2, chloroplastic/mitochondrial-like [Juglans regia]	AT1G61680 | TPS14, ATTPS14 , terpene synthase 14	C1
FtPinG0007457600.01	22.4378	25.3375	32.0336	6.03268	23.7537	31.7775	17.8105	23.5526	26.6348	8.27894	5.76988	8.86935	XP_019105363.1|PREDICTED: uncharacterized protein LOC104894851 [Beta vulgaris subsp. vulgaris]	AT2G47360 | unknown protein; BEST Arabidopsis thaliana protein match is: unknown protein (TAIR:AT1G02570.1); Has 58 Blast hits to 55 proteins in 6 species: Archae - 0; Bacteria - 0; Metazoa - 0; Fungi - 0; Plants - 58; Viruses - 0; Other Eukaryotes - 0 (source: NCBI BLink).	C1
FtPinG0006523200.01	20.398	25.3375	31.0325	12.0654	10.2933	40.4441	11.8736	17.1292	14.9155	1.83976	2.88494	5.54334	XP_021843637.1|peroxidase 57-like [Spinacia oleracea]	AT5G17820 | Peroxidase superfamily protein	C1
FtPinG0005568000.01	19.3781	42.567	16.0168	2.01089	8.7097	18.2961	14.8421	20.3409	22.3732	3.67953	6.73153	6.65201	RCV07805.1|hypothetical protein SETIT_1G275000v2, partial [Setaria italica]	AT3G53730 | Histone superfamily protein	C1
FtPinG0004971800.01	19.3781	25.3375	12.0126	0	11.8769	7.70364	1.97894	2.14115	9.58853	0	0	0	XP_021714228.1|methylesterase 10-like [Chenopodium quinoa]	AT3G50440 | ATMES10, MES10 , methyl esterase 10	C1
FtPinG0004711600.01	18.3582	48.648	45.0472	8.04357	12.6687	37.5552	6.92629	18.1998	23.4386	13.7982	8.65483	3.32601	XP_018853125.1|PREDICTED: uncharacterized protein LOC109015097 [Juglans regia]	AT3G48660 | Protein of unknown function (DUF 3339)	C1
FtPinG0000925900.01	17.3383	32.432	69.0724	3.01634	29.2963	35.6293	20.7789	18.1998	9.58853	11.9585	2.88494	5.54334	XP_010260769.1|PREDICTED: organic cation/carnitine transporter 3-like [Nelumbo nucifera]	AT1G16390 | ATOCT3, 3-Oct , organic cation/carnitine transporter 3	C1
FtPinG0002846900.01	17.3383	32.432	55.0577	2.01089	16.6276	25.0368	8.90523	14.988	35.158	8.27894	0	8.86935	KII67733.1|Cornifin alpha [Thelohanellus kitauei]	-	C1
FtPinG0006813100.01	17.3383	62.837	47.0493	10.0545	22.9619	53.9255	44.5262	21.4115	28.7656	13.7982	4.80824	7.76068	XP_006487931.3|peroxidase 60 [Citrus sinensis]	AT4G26010 | Peroxidase superfamily protein	C1
FtPinG0002388200.01	17.3383	25.3375	26.0273	1.00545	14.2522	24.0739	15.8315	18.1998	27.7002	4.59941	8.65483	4.43468	XP_019106208.1|PREDICTED: repetitive proline-rich cell wall protein 2-like [Beta vulgaris subsp. vulgaris]	-	C1
FtPinG0001649900.01	14.2786	44.594	65.0682	15.0817	29.2963	61.6291	27.7052	41.7524	31.9618	5.51929	6.73153	8.86935	XP_010688270.1|PREDICTED: probable xyloglucan endotransglucosylase/hydrolase protein 26 [Beta vulgaris subsp. vulgaris]	AT4G28850 | XTH26, ATXTH26 , xyloglucan endotransglucosylase/hydrolase 26	C1
FtPinG0006549800.01	14.2786	47.6345	45.0472	18.098	15.044	29.8516	6.92629	28.9055	22.3732	11.0386	2.88494	3.32601	XP_012446519.1|PREDICTED: galactose oxidase [Gossypium raimondii]	AT1G19900 | glyoxal oxidase-related protein	C1
FtPinG0006344900.01	14.2786	21.2835	12.0126	2.01089	7.12612	11.5555	0.98947	1.07057	8.52314	1.83976	0.961647	2.21734	XP_006435753.1|zinc finger CCCH domain-containing protein 29 [Citrus clementina]	AT5G58620 | zinc finger (CCCH-type) family protein	C1
FtPinG0003203100.01	13.2587	81.0801	69.0724	2.01089	2.37537	62.5921	6.92629	18.1998	42.6157	9.19882	9.61647	3.32601	OTG24385.1|putative metallothionein-like protein 1 [Helianthus annuus]	-	C1
FtPinG0009226200.01	11.2189	35.4725	29.0304	4.02179	11.8769	29.8516	2.96841	16.0586	28.7656	8.27894	3.84659	5.54334	-	-	C1
FtPinG0005336500.01	11.2189	7.09451	11.0115	3.01634	15.8358	36.5923	56.3998	20.3409	33.0272	20.2374	0	12.1954	KMT13087.1|hypothetical protein BVRB_4g086280 [Beta vulgaris subsp. vulgaris]	-	C1
FtPinG0004883400.01	9.1791	20.27	26.0273	4.02179	14.2522	38.5182	12.8631	16.0586	27.7002	5.51929	0.961647	2.21734	XP_021861236.1|peroxidase 57-like [Spinacia oleracea]	AT5G17820 | Peroxidase superfamily protein	C1
FtPinG0006565000.01	6.1194	30.405	9.00944	0	1.58358	25.0368	0.98947	1.07057	1.06539	0.919882	0	0	NP_001234318.1|root-specific metal transporter [Solanum lycopersicum]	AT1G15960 | NRAMP6, ATNRAMP6 , NRAMP metal ion transporter 6	C1
FtPinG0008375800.01	2.0398	10.135	43.0451	38.207	0	0.962955	0	18.1998	1.06539	0	0	1.10867	XP_011092226.1|uncharacterized protein LOC105172481 [Sesamum indicum]	AT1G79020 | Enhancer of polycomb-like transcription factor protein	C1
FtPinG0000140900.01	2.0398	4.054	0	2.01089	6.33433	3.85182	22.7578	19.2703	27.7002	4.59941	0	0	XP_002298589.1|myb-related protein 315 [Populus trichocarpa]	AT5G14340 | AtMYB40, MYB40 , myb domain protein 40	C1
FtPinG0001164200.01	0	36.486	8.00839	1.00545	17.4194	8.6666	4.94735	5.35287	4.26157	0	0	1.10867	XP_018817136.1|PREDICTED: bark storage protein A-like [Juglans regia]	AT4G28940 | Phosphorylase superfamily protein	C1
FtPinG0007852400.01	12537.6	4691.5	9986.46	8746.38	10173.7	9366.66	17622.5	12054.7	9941.18	14973.8	22116	21134.6	OVA09444.1|Aminotransferase [Macleaya cordata]	AT2G13360 | AGT, AGT1, SGAT , alanine:glyoxylate aminotransferase	C2
FtPinG0000332200.01	3496.22	2393.89	2754.89	10242.5	5618.55	3307.75	6035.77	5811.08	6789.75	4126.59	6726.72	7496.82	KNA25598.1|hypothetical protein SOVF_005150 [Spinacia oleracea]	AT2G46660 | CYP78A6 , cytochrome P450, family 78, subfamily A, polypeptide 6	C2
FtPinG0000231000.01	3194.33	1360.12	2222.33	6763.64	3042.85	2236.94	4398.2	4051.05	3056.61	3838.67	5725.65	4800.54	XP_021674785.1|S-adenosylmethionine decarboxylase proenzyme-like [Hevea brasiliensis]	AT3G25570 | Adenosylmethionine decarboxylase family protein	C2
FtPinG0001478700.01	2429.4	2650.3	2601.73	15913.2	6643.92	3194.12	7634.75	9924.22	8989.78	11345.8	15284.4	13024.6	XP_018850821.1|PREDICTED: inositol-3-phosphate synthase [Juglans regia]	AT2G22240 | ATMIPS2, MIPS2, ATIPS2 , myo-inositol-1-phosphate synthase 2	C2
FtPinG0001149500.01	2027.56	1211.13	2067.17	2775.03	3768.13	2064.58	3803.52	2458.04	1944.34	3536.03	4946.71	4369.26	XP_012072274.1|endoglucanase 8 [Jatropha curcas]	AT1G70710 | ATGH9B1, CEL1, GH9B1 , glycosyl hydrolase 9B1	C2
FtPinG0001156500.01	1921.49	3825.97	2629.75	5676.75	5352.51	4581.74	1986.86	6927.69	6418.99	5075.91	5892.01	9152.06	XP_022895920.1|kirola-like [Olea europaea var. sylvestris]	AT1G70890 | MLP43 , MLP-like protein 43	C2
FtPinG0006584900.01	1797.06	1645.93	1926.02	2820.28	2366.66	1894.13	1957.17	2447.33	2435.49	3187.39	3930.25	3704.06	XP_022956700.1|putative uncharacterized protein DDB_G0268364 isoform X2 [Cucurbita moschata]	AT2G01190 | Octicosapeptide/Phox/Bem1p family protein	C2
FtPinG0009180400.01	1521.69	639.519	1168.22	1359.36	1314.37	986.066	1536.65	1149.8	789.456	1697.18	2735.89	2686.3	XP_006422604.1|rac-like GTP-binding protein RAC1 [Citrus clementina]	AT4G35020 | RAC3 , RAC-like 3	C2
FtPinG0002523300.01	1448.26	1194.92	1861.95	2854.46	2513.94	1734.28	2850.66	4460.01	5010.54	3547.07	4630.33	5092.12	XP_021767168.1|BAG family molecular chaperone regulator 6 [Chenopodium quinoa]	AT2G46240 | BAG6, ATBAG6 , BCL-2-associated athanogene 6	C2
FtPinG0004875000.01	1429.9	1097.62	990.037	4674.32	1997.69	1832.5	2249.07	2948.36	2092.43	2318.1	2435.85	3341.53	XP_021747957.1|non-functional NADPH-dependent codeinone reductase 2-like [Chenopodium quinoa]	AT1G59960 | NAD(P)-linked oxidoreductase superfamily protein	C2
FtPinG0007858200.01	1325.87	602.019	928.973	867.7	2416.55	2605.76	1096.33	1074.86	1133.58	1836.09	2119.47	2390.29	XP_021742929.1|desiccation-related protein PCC13-62-like [Chenopodium quinoa]	AT1G47980 | unknown protein; FUNCTIONS IN: molecular_function unknown; INVOLVED IN: biological_process unknown; LOCATED IN: endomembrane system; EXPRESSED IN: 6 plant structures; EXPRESSED DURING: 4 anthesis, F mature embryo stage, petal differentiation and expansion stage, E expanded cotyledon stage; BEST Arabidopsis thaliana protein match is: unknown protein (TAIR:AT3G62730.1); Has 169 Blast hi…	C2
FtPinG0005725200.01	1266.72	1641.87	1753.84	7391.04	3424.5	2512.35	4669.31	8353.69	8105.51	4721.76	7625.86	4506.74	GAU49026.1|hypothetical protein TSUD_87280 [Trifolium subterraneum]	AT3G12580 | HSP70, ATHSP70 , heat shock protein 70	C2
FtPinG0009334000.01	1247.34	1371.27	1227.29	1775.62	1549.54	1464.65	2018.52	2599.35	2254.37	2993.3	3023.42	1806.02	XP_021733828.1|berberine bridge enzyme-like 15 [Chenopodium quinoa]	AT2G34790 | MEE23, EDA28 , FAD-binding Berberine family protein	C2
FtPinG0009021800.01	1068.86	1136.13	1125.18	1674.07	1446.6	1318.29	920.207	1904.55	1821.82	1957.51	2422.39	2452.38	AMN14860.1|putative alpha-galactosidase 2 [Nepenthes mirabilis]	AT3G56310 | Melibiase family protein	C2
FtPinG0003028700.01	1039.28	1055.05	1040.09	1350.31	2701.59	1450.21	3153.44	3074.69	2765.76	2146.09	3650.41	3607.61	WP_086002551.1|hypothetical protein [Nocardiopsis ganjiahuensis]	-	C2
FtPinG0008976200.01	893.433	405.4	822.862	929.032	1093.46	588.366	1677.15	1328.58	891.734	1411.1	2035.81	1729.52	XP_009805047.1|PREDICTED: phototropin-2 [Nicotiana sylvestris]	AT5G58140 | PHOT2, NPL1 , phototropin 2	C2
FtPinG0008353500.01	793.482	963.839	1107.16	1831.92	1447.39	1512.8	865.786	3167.83	2400.33	1734.9	2908.02	1980.08	XP_010273703.1|PREDICTED: 17.3 kDa class I heat shock protein-like [Nelumbo nucifera]	AT1G53540 | HSP20-like chaperones superfamily protein	C2
FtPinG0001579000.01	770.025	331.415	672.705	1167.32	1092.67	744.364	1128.99	1110.19	1366.9	1022.91	1372.27	1129.73	XP_024994936.1|uncharacterized protein LOC112528202 [Cynara cardunculus var. scolymus]	-	C2
FtPinG0000333300.01	761.866	791.544	713.748	1214.58	1116.43	973.548	800.481	1172.28	897.061	1161.81	1691.54	1920.21	PHT55013.1|hypothetical protein CQW23_03499 [Capsicum baccatum]	AT4G33540 | metallo-beta-lactamase family protein	C2
FtPinG0002448300.01	719.03	1369.24	868.91	3168.16	1530.53	922.511	1445.62	1954.87	2669.87	2628.1	2444.51	1246.14	XP_015075055.1|PREDICTED: peroxidase P7-like [Solanum pennellii]	AT5G05340 | Peroxidase superfamily protein	C2
FtPinG0009670800.01	637.438	1071.27	553.58	1758.53	1069.71	848.363	2463.78	1682.94	2063.67	4858.82	5514.09	3319.35	XP_022154431.1|alcohol dehydrogenase class-P [Momordica charantia]	AT1G77120 | ADH1, ADH, ATADH, ATADH1 , alcohol dehydrogenase 1	C2
FtPinG0003200600.01	636.418	1002.35	721.756	2018.94	1363.46	984.14	2056.12	2393.8	2979.9	2989.62	2641.65	1861.46	ACH63212.1|glutathione-S-transferase [Rheum australe]	AT5G02780 | GSTL1 , glutathione transferase lambda 1	C2
FtPinG0003636600.01	561.965	858.435	775.813	2104.4	1271.62	825.253	687.682	1599.44	1442.54	1317.27	2040.62	1650.81	PHT42615.1|Umecyanin [Capsicum baccatum]	AT5G20230 | ATBCB, BCB, SAG14 , blue-copper-binding protein	C2
FtPinG0004050500.01	561.965	344.59	574.602	563.05	717.363	518.07	1045.87	661.615	701.028	1068.9	1642.49	1894.72	PPD79017.1|hypothetical protein GOBAR_DD24070 [Gossypium barbadense]	AT2G20570 | GPRI1, GLK1, ATGLK1 , GBF's pro-rich region-interacting factor 1	C2
FtPinG0001878400.01	554.826	267.564	457.479	716.883	537.626	354.367	591.703	536.358	498.604	736.826	1253.03	1148.58	OMP03907.1|hypothetical protein COLO4_10120 [Corchorus olitorius]	AT1G60060 | Serine/threonine-protein kinase WNK (With No Lysine)-related	C2
FtPinG0001465000.01	520.149	368.914	644.675	549.979	699.152	597.995	842.039	1268.63	714.879	1171.01	1013.58	1087.6	ONI28536.1|hypothetical protein PRUPE_1G146600 [Prunus persica]	AT4G15530 | PPDK , pyruvate orthophosphate dikinase	C2
FtPinG0006994600.01	479.353	663.843	399.418	3398.41	1195.6	603.773	1691	2339.2	2658.15	1443.3	2369.5	1395.81	XP_011086861.1|GEM-like protein 5 [Sesamum indicum]	AT5G13200 | GRAM domain family protein	C2
FtPinG0008433800.01	464.055	511.818	586.615	1146.21	972.319	929.252	341.367	1876.72	1373.29	1415.7	2108.89	1654.13	XP_007016442.2|PREDICTED: 18.1 kDa class I heat shock protein [Theobroma cacao]	AT1G53540 | HSP20-like chaperones superfamily protein	C2
FtPinG0001193200.01	417.139	331.415	428.449	682.698	488.535	511.329	482.861	720.496	679.721	620.921	900.102	863.653	XP_021859034.1|calcyclin-binding protein-like [Spinacia oleracea]	AT1G30070 | SGS domain-containing protein	C2
FtPinG0006067700.01	402.861	179.39	367.385	2093.34	844.841	450.663	866.776	1126.24	568.92	936.44	1463.63	839.262	POO04026.1|Guanine nucleotide-binding protein, beta subunit [Trema orientale]	AT1G78070 | Transducin/WD40 repeat-like superfamily protein	C2
FtPinG0002624700.01	379.403	559.452	620.65	1421.7	901.058	727.994	528.377	1193.69	854.445	1126.86	1114.55	1250.58	XP_015086686.1|PREDICTED: homocysteine S-methyltransferase 2 [Solanum pennellii]	AT3G22740 | HMT3 , homocysteine S-methyltransferase 3	C2
FtPinG0006394700.01	348.806	519.926	416.436	1822.87	780.706	521.922	585.766	1064.15	859.772	952.998	1096.28	797.133	XP_004245510.1|UDP-glucose 4-epimerase GEPI48 [Solanum lycopersicum]	AT4G10960 | UGE5 , UDP-D-glucose/UDP-D-galactose 4-epimerase 5	C2
FtPinG0000156900.01	339.627	168.241	373.391	188.018	680.94	518.07	1273.45	620.933	357.972	495.817	704.887	720.635	XP_021629734.1|polygalacturonase At1g48100 [Manihot esculenta]	AT1G10640 | Pectin lyase-like superfamily protein	C2
FtPinG0005606400.01	295.771	198.646	261.274	265.438	311.174	280.22	606.545	504.24	330.272	425.906	539.484	560.986	XP_021646921.1|J domain-containing protein required for chloroplast accumulation response 1 isoform X2 [Hevea brasiliensis]	AT1G75100 | JAC1 , J-domain protein required for chloroplast accumulation response 1	C2
FtPinG0006384000.01	293.731	283.78	255.267	345.874	200.323	294.664	349.283	321.172	297.245	589.645	707.772	440.142	XP_024031638.1|plant cysteine oxidase 2 [Morus notabilis]	AT5G39890 | Protein of unknown function (DUF1637)	C2
FtPinG0009672300.01	291.691	462.156	314.329	1181.4	901.058	727.994	705.492	1127.31	1006.8	775.461	907.795	1443.49	XP_021771668.1|bidirectional sugar transporter SWEET1-like [Chenopodium quinoa]	AT1G21460 | SWEET1, AtSWEET1 , Nodulin MtN3 family protein	C2
FtPinG0002732800.01	250.895	173.309	160.168	1221.62	502.787	311.034	283.978	358.642	430.419	438.784	308.689	758.33	XP_007017458.1|PREDICTED: calcium uniporter protein 4, mitochondrial [Theobroma cacao]	AT5G42610 | Protein of unknown function (DUF607)	C2
FtPinG0004908100.01	235.597	204.727	271.284	669.627	361.849	287.924	381.936	801.86	617.928	476.499	573.142	589.812	XP_010244687.1|PREDICTED: heat shock 70 kDa protein, mitochondrial-like [Nelumbo nucifera]	AT5G09590 | MTHSC70-2, HSC70-5 , mitochondrial HSO70 2	C2
FtPinG0008924300.01	233.557	192.565	505.53	1107	860.677	397.7	571.914	1128.39	636.039	715.669	822.208	818.198	XP_023878663.1|ABC transporter G family member 22-like isoform X1 [Quercus suber]	AT5G06530 | ABC-2 type transporter family protein	C2
FtPinG0003230400.01	228.458	331.415	350.367	591.202	389.561	386.145	340.378	791.154	682.917	583.205	649.112	686.266	OWM77634.1|hypothetical protein CDL15_Pgr017034 [Punica granatum]	AT4G21320 | HSA32 , Aldolase-type TIM barrel family protein	C2
FtPinG0007091300.01	223.358	195.606	239.251	433.347	361.057	276.368	386.883	446.429	493.277	344.036	380.812	434.598	XP_010696488.1|PREDICTED: protein PHOSPHATE STARVATION RESPONSE 1 isoform X3 [Beta vulgaris subsp. vulgaris]	AT4G28610 | PHR1, AtPHR1 , phosphate starvation response 1	C2
FtPinG0003060600.01	221.318	204.727	275.288	515.794	385.602	211.85	281.01	454.994	365.43	386.351	515.443	567.639	XP_002276261.2|PREDICTED: potassium transporter 11 [Vitis vinifera]	AT2G35060 | KUP11 , K+ uptake permease 11	C2
FtPinG0009408600.01	210.099	199.66	180.189	196.062	548.711	442.959	753.976	764.39	611.535	568.487	744.315	1046.58	XP_022759198.1|zinc finger protein CONSTANS-LIKE 2-like [Durio zibethinus]	AT3G02380 | COL2, ATCOL2 , CONSTANS-like 2	C2
FtPinG0009163400.01	207.04	326.347	246.258	603.268	389.561	348.59	435.367	605.945	648.824	583.205	476.977	417.968	CBI38472.3|unnamed protein product, partial [Vitis vinifera]	AT1G47670 | Transmembrane amino acid transporter family protein	C2
FtPinG0005837700.01	197.861	506.75	198.208	334.814	978.654	828.141	426.462	780.449	804.372	554.689	825.093	768.308	XP_023886610.1|basic 7S globulin-like [Quercus suber]	AT1G03220 | Eukaryotic aspartyl protease family protein	C2
FtPinG0005900400.01	191.741	145.944	160.168	422.287	346.805	200.295	281.01	217.327	229.059	403.828	360.618	434.598	XP_021741065.1|probable calcium-binding protein CML49 [Chenopodium quinoa]	AT5G04170 | Calcium-binding EF-hand family protein	C2
FtPinG0000380300.01	191.741	119.593	125.131	331.797	172.61	186.813	178.105	480.688	264.217	262.167	297.149	333.709	AHA36967.1|granule bound starch synthase I [Fagopyrum tataricum]	AT1G32900 | UDP-Glycosyltransferase superfamily protein	C2
FtPinG0007654500.01	189.701	245.267	315.33	485.631	371.35	375.552	273.094	913.2	721.271	572.167	675.076	762.764	XP_015897588.1|2,3-bisphosphoglycerate-independent phosphoglycerate mutase [Ziziphus jujuba]	AT1G09780 | Phosphoglycerate mutase, 2,3-bisphosphoglycerate-independent	C2
FtPinG0004106700.01	186.642	260.47	265.278	471.554	334.136	287.924	240.441	1051.3	701.028	654.036	822.208	790.481	XP_019157854.1|PREDICTED: stromal 70 kDa heat shock-related protein, chloroplastic-like [Ipomoea nil]	AT5G49910 | CPHSC70-2EAT SHOCK PROTEIN 70-2, HSC70-7, cpHsc70-2 , chloroplast heat shock protein 70-2	C2
FtPinG0009530600.01	186.642	152.025	193.202	693.758	281.086	217.628	152.378	341.513	306.833	559.289	818.362	604.225	XP_021758477.1|ATPase 4, plasma membrane-type [Chenopodium quinoa]	AT5G62670 | AHA11, HA11 , H(+)-ATPase 11	C2
FtPinG0007768600.01	172.363	213.849	166.174	147.801	376.893	131.925	154.357	309.396	307.899	322.879	587.566	341.47	PON84995.1|Oxoglutarate/iron-dependent dioxygenase [Trema orientale]	AT1G17020 | SRG1, ATSRG1 , senescence-related gene 1	C2
FtPinG0008844900.01	166.244	229.051	203.213	2109.43	759.328	367.849	631.282	1582.31	1214.55	2099.17	3050.35	1869.22	XP_021722294.1|sucrose synthase-like [Chenopodium quinoa]	AT4G02280 | SUS3, ATSUS3 , sucrose synthase 3	C2
FtPinG0008104600.01	162.164	98.3096	110.115	269.46	270.001	104.962	290.904	264.432	283.394	210.653	329.845	237.255	XP_012440317.1|PREDICTED: mitogen-activated protein kinase 9-like [Gossypium raimondii]	AT1G73670 | ATMPK15, MPK15 , MAP kinase 15	C2
FtPinG0004600700.01	158.085	210.808	285.299	500.712	406.981	389.034	227.578	841.471	690.375	363.354	546.216	483.38	XP_007200247.1|22.0 kDa class IV heat shock protein [Prunus persica]	AT4G10250 | ATHSP22.0 , HSP20-like chaperones superfamily protein	C2
FtPinG0008274300.01	150.945	126.688	121.127	503.729	248.622	161.776	146.442	233.385	275.937	222.612	351.963	237.255	XP_010278524.1|PREDICTED: dehydration-responsive element-binding protein 1D-like [Nelumbo nucifera]	AT5G51990 | CBF4, DREB1D , C-repeat-binding factor 4	C2
FtPinG0001034500.01	150.945	90.2016	80.0839	169.92	83.9299	84.74	90.0418	97.4223	79.9045	160.979	288.494	269.407	PQP93515.1|LOB domain-containing protein 39 [Prunus yedoensis var. nudiflora]	AT3G49940 | LBD38 , LOB domain-containing protein 38	C2
FtPinG0007677900.01	144.826	203.714	234.245	502.723	377.684	321.627	202.841	469.982	424.026	390.03	532.753	526.618	PON61747.1|Glycosyl hydrolase [Parasponia andersonii]	AT4G01970 | AtSTS, STS , stachyose synthase	C2
FtPinG0007987900.01	139.726	163.174	145.152	400.168	346.013	331.257	410.63	799.719	459.184	420.386	511.596	465.641	XP_006444317.1|phytochrome A-associated F-box protein [Citrus clementina]	AT4G02440 | EID1 , F-box family protein	C2
FtPinG0002021000.01	136.667	140.877	177.186	367.993	243.08	194.517	55.4103	511.735	368.626	423.146	738.545	431.272	XP_021729477.1|heavy metal-associated isoprenylated plant protein 24-like [Chenopodium quinoa]	AT4G08570 | Heavy metal transport/detoxification superfamily protein	C2
FtPinG0006097600.01	135.647	46.621	115.121	170.926	157.566	90.5178	142.484	141.316	104.408	149.941	275.993	278.276	AHB64333.1|3-hydroxy-3-methylglutaryl coenzyme A reductase [Camellia sinensis]	AT1G76490 | HMG1, HMGR1, AtHMGR1 , hydroxy methylglutaryl CoA reductase 1	C2
FtPinG0005188000.01	133.607	77.0261	125.131	96.5228	133.021	100.147	147.431	108.128	90.5584	156.38	457.744	320.405	POO02609.1|PQ-loop repeat [Trema orientale]	AT4G36850 | PQ-loop repeat family protein / transmembrane family protein	C2
FtPinG0008433900.01	132.587	158.106	176.185	279.514	224.869	266.739	61.3472	390.76	248.237	260.327	606.799	297.123	KGN50621.1|hypothetical protein Csa_5G197120 [Cucumis sativus]	-	C2
FtPinG0000901300.01	123.408	88.1746	71.0745	149.811	193.989	98.2214	118.736	128.469	135.305	153.62	338.5	228.386	XP_010685178.1|PREDICTED: vacuolar amino acid transporter 1-like [Beta vulgaris subsp. vulgaris]	AT2G41190 | Transmembrane amino acid transporter family protein	C2
FtPinG0002219600.01	118.308	79.0531	89.0933	427.315	285.837	161.776	439.325	631.639	337.73	490.297	517.366	338.144	CBI27347.3|unnamed protein product, partial [Vitis vinifera]	AT5G37260 | RVE2, CIR1 , Homeodomain-like superfamily protein	C2
FtPinG0005502300.01	113.209	221.957	214.224	528.865	358.681	462.218	244.399	497.817	199.228	470.98	310.612	495.575	XP_022872993.1|inorganic phosphate transporter 1-4 [Olea europaea var. sylvestris]	AT3G54700 | PHT1;7 , phosphate transporter 1;7	C2
FtPinG0008926300.01	111.169	52.702	65.0682	91.4956	96.5985	66.4439	123.684	84.5754	73.5121	117.745	165.403	226.168	XP_019153885.1|PREDICTED: E3 ubiquitin-protein ligase RHF2A-like isoform X3 [Ipomoea nil]	AT5G22000 | RHF2A , RING-H2 group F2A	C2
FtPinG0006955500.01	108.109	162.16	176.185	241.307	220.91	226.294	117.747	229.103	239.713	236.41	327.922	359.209	XP_027088600.1|auxin-binding protein T85-like [Coffea arabica]	AT4G02980 | ABP1, ABP , endoplasmic reticulum auxin binding protein 1	C2
FtPinG0006335800.01	108.109	60.81	115.121	241.307	106.892	63.555	172.168	127.398	35.158	239.169	289.456	113.084	XP_021715668.1|histone deacetylase 8-like [Chenopodium quinoa]	AT1G08460 | HDA08, HDA8, ATHDA8 , histone deacetylase 8	C2
FtPinG0001847800.01	103.01	82.0936	83.087	91.4956	126.687	141.554	231.536	290.126	174.724	418.547	450.051	421.294	PNT40036.1|hypothetical protein POPTR_004G074300v3 [Populus trichocarpa]	AT5G17300 | RVE1 , Homeodomain-like superfamily protein	C2
FtPinG0000789800.01	101.99	60.81	126.132	262.421	154.399	96.2955	157.326	150.951	85.2314	159.14	210.601	216.19	PIA33086.1|hypothetical protein AQUCO_04200089v1 [Aquilegia coerulea]	AT4G33920 | Protein phosphatase 2C family protein	C2
FtPinG0002461800.01	101.99	157.093	104.109	109.594	159.942	112.666	111.81	209.833	125.716	199.614	232.719	340.361	XP_012065634.1|agamous-like MADS-box protein AGL15 [Jatropha curcas]	AT5G13790 | AGL15 , AGAMOUS-like 15	C2
FtPinG0007655100.01	97.9104	56.756	67.0703	111.605	60.9679	66.4439	87.0734	76.0108	95.8853	109.466	164.442	174.061	-	-	C2
FtPinG0005555500.01	94.8507	118.58	41.043	596.23	102.933	120.369	168.21	367.207	571.051	432.345	601.03	233.929	OMO97927.1|Phosphatidylethanolamine-binding protein PEBP [Corchorus olitorius]	AT5G62040 | PEBP (phosphatidylethanolamine-binding protein) family protein	C2
FtPinG0006707500.01	93.8308	96.2826	144.151	86.4684	118.769	128.073	128.631	261.22	270.61	332.997	170.212	427.946	PSS31219.1|Phospholipase D delta like [Actinidia chinensis var. chinensis]	AT4G35790 | ATPLDDELTA, PLDDELTA , phospholipase D delta	C2
FtPinG0002608200.01	92.8109	58.783	112.117	349.895	208.241	86.666	206.799	184.139	137.436	143.502	275.031	139.692	KMT20052.1|hypothetical protein BVRB_1g000710 [Beta vulgaris subsp. vulgaris]	AT1G22710 | SUC2, SUT1, ATSUC2 , sucrose-proton symporter 2	C2
FtPinG0000425000.01	90.7711	99.3231	108.113	94.5119	87.8888	161.776	155.347	205.55	177.921	251.128	226.949	160.757	XP_023928311.1|amino acid transporter AVT6A-like [Quercus suber]	AT3G30390 | Transmembrane amino acid transporter family protein	C2
FtPinG0003610000.01	88.7313	103.377	138.145	496.69	390.353	238.813	152.378	551.346	474.1	327.478	478.9	442.359	XP_021772382.1|uncharacterized protein LOC110736472 [Chenopodium quinoa]	AT1G65090 | unknown protein; BEST Arabidopsis thaliana protein match is: unknown protein (TAIR:AT5G36100.1); Has 1435 Blast hits to 1033 proteins in 192 species: Archae - 0; Bacteria - 61; Metazoa - 511; Fungi - 123; Plants - 100; Viruses - 42; Other Eukaryotes - 598 (source: NCBI BLink).	C2
FtPinG0004555900.01	86.6915	127.701	88.0923	145.79	118.769	121.332	84.105	221.609	158.744	221.692	288.494	247.233	XP_021754202.1|uncharacterized protein LOC110719554 isoform X1 [Chenopodium quinoa]	AT1G63830 | PLAC8 family protein	C2
FtPinG0007011400.01	83.6318	64.8641	112.117	206.116	197.156	148.295	120.715	240.879	177.921	234.57	402.93	434.598	XP_023887552.1|15.7 kDa heat shock protein, peroxisomal [Quercus suber]	AT5G37670 | HSP20-like chaperones superfamily protein	C2
FtPinG0009023200.01	83.6318	28.378	77.0808	24.1307	240.705	180.073	245.389	135.963	122.52	137.982	208.677	184.039	XP_010095758.1|O-acyltransferase WSD1 [Morus notabilis]	AT5G53390 | O-acyltransferase (WSD1-like) family protein	C2
FtPinG0005520600.01	83.6318	73.9856	61.064	94.5119	75.2202	60.6662	102.905	83.5048	79.9045	140.742	143.285	187.365	XP_021733127.1|pectinesterase inhibitor 10-like [Chenopodium quinoa]	AT2G01610 | Plant invertase/pectin methylesterase inhibitor superfamily protein	C2
FtPinG0001818900.01	82.6119	112.499	94.0986	657.562	277.127	173.332	360.167	1047.02	623.255	711.989	704.887	691.809	XP_008454418.1|PREDICTED: probable zinc metallopeptidase EGY3, chloroplastic [Cucumis melo]	AT1G17870 | ATEGY3, EGY3 , ethylene-dependent gravitropism-deficient and yellow-green-like 3	C2
FtPinG0006225500.01	81.592	65.8776	75.0787	199.078	102.933	68.3698	155.347	163.798	187.509	169.258	223.102	148.562	XP_010256907.1|PREDICTED: expansin-A4 [Nelumbo nucifera]	AT2G39700 | ATEXPA4, ATEXP4, ATHEXP ALPHA 1.6, EXPA4 , expansin A4	C2
FtPinG0001046900.01	80.5721	73.9856	95.0996	248.345	105.308	102.073	114.779	169.151	68.1851	185.816	278.878	113.084	KZV53293.1|plasma membrane ATPase 1-like [Dorcoceras hygrometricum]	AT3G42640 | AHA8, HA8 , H(+)-ATPase 8	C2
FtPinG0001724500.01	77.5124	34.459	85.0891	192.04	250.998	58.7403	142.484	74.9402	216.275	125.104	465.437	176.278	XP_010679084.1|PREDICTED: vicilin-like antimicrobial peptides 2-3 [Beta vulgaris subsp. vulgaris]	AT3G22640 | PAP85 , cupin family protein	C2
FtPinG0007566000.01	73.4328	128.715	164.172	211.144	224.869	245.554	43.5367	1207.61	424.026	493.977	1409.77	1038.82	XP_010666147.1|PREDICTED: small heat shock protein, chloroplastic [Beta vulgaris subsp. vulgaris]	AT4G27670 | HSP21 , heat shock protein 21	C2
FtPinG0000232600.01	73.4328	69.9316	62.065	117.637	45.9239	62.5921	135.557	115.622	104.408	138.902	162.518	125.28	-	-	C2
FtPinG0001349300.01	72.4129	18.243	44.0461	71.3867	64.9269	52.9625	97.9576	50.317	43.6811	119.585	188.483	155.214	XP_021862654.1|uncharacterized protein LOC110801604 [Spinacia oleracea]	AT2G01190 | Octicosapeptide/Phox/Bem1p family protein	C2
FtPinG0002200500.01	70.3731	93.2421	74.0776	270.465	104.516	89.5548	173.157	176.645	242.91	166.499	224.064	135.258	XP_013644105.1|serine/arginine-rich-splicing factor SR34-like [Brassica napus]	AT1G02840 | SR1, ATSRP34, SRP34, SR34, At-SR34 , RNA-binding (RRM/RBD/RNP motifs) family protein	C2
FtPinG0001546500.01	69.3532	66.8911	65.0682	138.752	90.2642	105.925	123.684	202.339	143.828	172.938	186.56	144.127	PSS30082.1|Protein REVEILLE like [Actinidia chinensis var. chinensis]	AT5G17300 | RVE1 , Homeodomain-like superfamily protein	C2
FtPinG0004446500.01	67.3134	137.836	37.0388	71.3867	130.646	58.7403	45.5156	41.7524	79.9045	158.22	360.618	158.54	ATO91437.1|putative cytochrome P450 [Fallopia multiflora]	AT2G45570 | CYP76C2 , cytochrome P450, family 76, subfamily C, polypeptide 2	C2
FtPinG0003392700.01	66.2935	61.8235	59.0619	102.556	98.1821	69.3328	91.0313	112.41	94.82	109.466	154.825	114.193	XP_021280277.1|BI1-like protein [Herrania umbratica]	AT1G03070 | Bax inhibitor-1 family protein	C2
FtPinG0008639500.01	65.2736	38.513	71.0745	204.106	89.4724	49.1107	61.3472	112.41	54.335	119.585	197.138	105.324	-	-	C2
FtPinG0008127200.01	63.2338	46.621	83.087	186.008	113.226	51.9996	137.536	124.187	84.166	116.825	252.913	124.171	-	-	C2
FtPinG0003132500.01	62.2139	58.783	49.0514	118.643	129.854	116.518	170.189	327.596	365.43	228.131	275.031	291.58	XP_014503577.1|uncharacterized protein LOC106763913 isoform X1 [Vigna radiata var. radiata]	AT2G42975 | unknown protein; FUNCTIONS IN: molecular_function unknown; INVOLVED IN: biological_process unknown; LOCATED IN: chloroplast thylakoid membrane, chloroplast; Has 32 Blast hits to 32 proteins in 16 species: Archae - 0; Bacteria - 0; Metazoa - 2; Fungi - 2; Plants - 28; Viruses - 0; Other Eukaryotes - 0 (source: NCBI BLink).	C2
FtPinG0009234700.01	62.2139	11.1485	40.0419	927.021	525.749	127.11	636.229	1207.61	867.23	1070.74	1461.7	847.023	XP_002275195.1|PREDICTED: cinnamoyl-CoA reductase 1 [Vitis vinifera]	AT5G58490 | NAD(P)-binding Rossmann-fold superfamily protein	C2
FtPinG0005329600.01	59.1542	147.971	103.108	160.871	76.8037	124.221	215.705	276.208	219.471	321.959	324.075	220.625	AUT31007.1|cinnamate 4-hydroxylase [Fagopyrum tataricum]	AT2G30490 | ATC4H, C4H, CYP73A5, REF3 , cinnamate-4-hydroxylase	C2
FtPinG0000856600.01	57.1144	65.8776	55.0577	51.2778	49.091	85.703	143.473	84.5754	76.7083	126.024	176.943	107.541	XP_020208760.1|plant cysteine oxidase 2-like isoform X4 [Cajanus cajan]	AT5G15120 | Protein of unknown function (DUF1637)	C2
FtPinG0002598700.01	57.1144	25.3375	32.0336	38.207	36.4224	34.6664	101.915	381.124	169.397	314.6	449.089	355.883	AAQ73524.1|circadian clock associated1 [Mesembryanthemum crystallinum]	AT2G46830 | CCA1 , circadian clock associated 1	C2
FtPinG0005540300.01	55.0746	47.6345	49.0514	336.824	166.276	124.221	106.863	390.76	224.798	193.175	385.621	134.149	XP_004303312.1|PREDICTED: uncharacterized protein LOC101299686 [Fragaria vesca subsp. vesca]	AT1G52565 | unknown protein; FUNCTIONS IN: molecular_function unknown; INVOLVED IN: biological_process unknown; LOCATED IN: endomembrane system; BEST Arabidopsis thaliana protein match is: unknown protein (TAIR:AT3G15760.1); Has 35333 Blast hits to 34131 proteins in 2444 species: Archae - 798; Bacteria - 22429; Metazoa - 974; Fungi - 991; Plants - 531; Viruses - 0; Other Eukaryotes - 9610 (source…	C2
FtPinG0009599500.01	55.0746	86.1476	40.0419	101.55	45.9239	54.8884	18.7999	46.0347	46.8773	124.184	180.79	95.3455	KNA22511.1|hypothetical protein SOVF_033580 [Spinacia oleracea]	AT5G64120 | Peroxidase superfamily protein	C2
FtPinG0005679700.01	54.0547	47.6345	28.0294	1530.29	862.261	231.109	322.567	782.59	1816.49	654.956	1839.63	653.006	XP_022842058.1|late embryogenesis abundant protein 46-like [Olea europaea var. sylvestris]	AT5G06760 | LEA4-5 , Late Embryogenesis Abundant 4-5	C2
FtPinG0002555800.01	53.0348	72.9721	105.11	68.3703	55.4254	32.7405	42.5472	118.834	55.4004	138.902	171.173	287.145	XP_021726012.1|cyclic nucleotide-gated ion channel 4-like isoform X2 [Chenopodium quinoa]	AT5G54250 | CNGC4 , cyclic nucleotide-gated cation channel 4	C2
FtPinG0000553200.01	53.0348	73.9856	87.0912	339.841	189.238	172.369	34.6315	443.218	263.152	201.454	329.845	311.536	XP_011470908.1|PREDICTED: uncharacterized protein LOC105349237 [Fragaria vesca subsp. vesca]	AT5G07330 | unknown protein; FUNCTIONS IN: molecular_function unknown; INVOLVED IN: biological_process unknown; LOCATED IN: mitochondrion; BEST Arabidopsis thaliana protein match is: unknown protein (TAIR:AT1G63060.1); Has 1807 Blast hits to 1807 proteins in 277 species: Archae - 0; Bacteria - 0; Metazoa - 736; Fungi - 347; Plants - 385; Viruses - 0; Other Eukaryotes - 339 (source: NCBI BLink).	C2
FtPinG0000637300.01	52.0149	86.1476	77.0808	282.53	144.106	110.74	178.105	179.856	144.893	189.496	194.253	125.28	XP_010275469.1|PREDICTED: putative glycerol-3-phosphate transporter 4 [Nelumbo nucifera]	AT4G17550 | Major facilitator superfamily protein	C2
FtPinG0001244600.01	52.0149	34.459	60.0629	208.127	102.933	83.7771	76.1892	125.257	113.997	106.706	194.253	137.475	XP_010678834.1|PREDICTED: tryptophan aminotransferase-related protein 2 [Beta vulgaris subsp. vulgaris]	AT4G24670 | TAR2 , tryptophan aminotransferase related 2	C2
FtPinG0001990100.01	52.0149	20.27	38.0399	136.741	87.097	48.1478	93.0102	69.5873	40.4849	91.9882	90.3948	109.758	XP_021755066.1|phosphate transporter PHO1 homolog 1-like [Chenopodium quinoa]	AT1G68740 | PHO1;H1 , EXS (ERD1/XPR1/SYG1) family protein	C2
FtPinG0005450700.01	50.995	42.567	42.044	94.5119	56.2172	50.0737	43.5367	77.0813	74.5775	91.0684	107.704	89.8022	PKI66405.1|hypothetical protein CRG98_013207, partial [Punica granatum]	AT4G22285 | Ubiquitin C-terminal hydrolases superfamily protein	C2
FtPinG0005155900.01	50.995	39.5265	32.0336	107.583	56.2172	33.7034	75.1997	86.7165	80.9698	94.7479	93.2798	130.823	XP_021760516.1|fluoride export protein 1-like [Chenopodium quinoa]	AT2G41705 | camphor resistance CrcB family protein	C2
FtPinG0009469900.01	49.9751	42.567	39.0409	81.4411	58.5925	50.0737	70.2524	58.8816	79.9045	80.9497	115.398	119.736	-	-	C2
FtPinG0001974600.01	48.9552	47.6345	43.0451	145.79	149.649	49.1107	70.2524	94.2105	70.3159	71.7508	136.554	104.215	XP_021855077.1|cell division cycle-associated 7-like protein [Spinacia oleracea]	AT2G23530 | Zinc-finger domain of monoamine-oxidase A repressor R1	C2
FtPinG0005485300.01	47.9353	39.5265	46.0482	131.713	83.9299	63.555	47.4946	135.963	170.463	98.4274	96.1647	95.3455	KCW83143.1|hypothetical protein EUGRSUZ_B00099 [Eucalyptus grandis]	AT3G48660 | Protein of unknown function (DUF 3339)	C2
FtPinG0000864300.01	45.8955	48.648	38.0399	74.403	49.8828	42.37	63.3261	85.6459	75.6429	100.267	85.5866	82.0415	XP_019153619.1|PREDICTED: uncharacterized protein LOC109150167 [Ipomoea nil]	AT3G11690 | unknown protein; FUNCTIONS IN: molecular_function unknown; INVOLVED IN: biological_process unknown; LOCATED IN: chloroplast; EXPRESSED IN: 24 plant structures; EXPRESSED DURING: 15 growth stages; BEST Arabidopsis thaliana protein match is: unknown protein (TAIR:AT5G06380.1); Has 84 Blast hits to 84 proteins in 12 species: Archae - 0; Bacteria - 0; Metazoa - 0; Fungi - 0; Plants - 84; …	C2
FtPinG0009648200.01	44.8756	25.3375	37.0388	104.566	72.053	40.4441	73.2208	51.3876	44.7465	62.552	83.6633	93.1282	ONH98361.1|hypothetical protein PRUPE_7G246300 [Prunus persica]	AT1G72230 | Cupredoxin superfamily protein	C2
FtPinG0009212400.01	44.8756	25.3375	29.0304	87.4738	41.1731	42.37	59.3682	41.7524	21.3079	80.9497	101.935	50.9988	XP_010651030.1|PREDICTED: probable protein S-acyltransferase 15 isoform X1 [Vitis vinifera]	AT4G24630 | DHHC-type zinc finger family protein	C2
FtPinG0000863700.01	43.8557	52.702	45.0472	337.83	106.892	57.7773	148.421	152.022	153.417	260.327	230.795	86.4762	PNS98223.1|hypothetical protein POPTR_016G065900v3 [Populus trichocarpa]	AT5G06530 | ABC-2 type transporter family protein	C2
FtPinG0001288200.01	42.8358	24.324	48.0503	391.119	241.496	109.777	106.863	317.961	486.884	195.935	449.089	139.692	XP_010675498.1|PREDICTED: probable protein phosphatase 2C 39 isoform X2 [Beta vulgaris subsp. vulgaris]	AT3G15260 | Protein phosphatase 2C family protein	C2
FtPinG0005085800.01	42.8358	30.405	30.0315	144.784	85.5134	52.9625	67.284	76.0108	40.4849	91.9882	69.2386	114.193	PSS11354.1|Aluminum-activated malate transporter like [Actinidia chinensis var. chinensis]	AT3G18440 | AtALMT9, ALMT9 , aluminum-activated malate transporter 9	C2
FtPinG0002928300.01	41.8159	36.486	31.0325	128.697	64.9269	37.5552	60.3577	55.6699	66.0544	58.8725	130.784	92.0195	XP_010684093.1|PREDICTED: probable receptor-like protein kinase At5g47070 [Beta vulgaris subsp. vulgaris]	AT5G03320 | Protein kinase superfamily protein	C2
FtPinG0005311400.01	41.8159	22.297	31.0325	71.3867	45.9239	24.0739	52.4419	61.0227	29.831	49.6737	105.781	80.9328	XP_023904711.1|protein indeterminate-domain 7-like [Quercus suber]	AT1G55110 | AtIDD7, IDD7 , indeterminate(ID)-domain 7	C2
FtPinG0000639900.01	40.796	72.9721	102.107	658.567	334.928	149.258	161.284	755.825	336.664	275.045	366.388	251.668	OMP05922.1|Phospholipid/glycerol acyltransferase [Corchorus olitorius]	AT1G06520 | ATGPAT1, GPAT1 , glycerol-3-phosphate acyltransferase 1	C2
FtPinG0005252800.01	40.796	23.3105	22.0231	4.02179	52.2582	99.1844	37.5999	40.6818	35.158	54.2731	73.0852	80.9328	XP_002273091.2|PREDICTED: O-glucosyltransferase rumi homolog [Vitis vinifera]	AT2G45830 | DTA2 , downstream target of AGL15 2	C2
FtPinG0002083100.01	39.7761	94.2556	34.0357	5925.09	2431.59	266.739	424.483	2497.65	4344.67	774.541	4274.52	668.527	XP_015938205.2|late embryogenesis abundant protein 2 [Arachis duranensis]	AT1G52690 | Late embryogenesis abundant protein (LEA) family protein	C2
FtPinG0005419000.01	38.7562	91.2151	57.0598	4271.14	2425.26	521.922	614.461	2035.16	3626.6	1774.45	5719.88	1522.2	XP_010679787.1|PREDICTED: dehydrin Rab18 [Beta vulgaris subsp. vulgaris]	AT3G50980 | XERO1 , dehydrin xero 1	C2
FtPinG0005540900.01	37.7363	32.432	47.0493	87.4738	52.2582	40.4441	23.7473	89.9282	86.2968	65.3117	370.234	82.0415	XP_022721219.1|26.5 kDa heat shock protein, mitochondrial-like [Durio zibethinus]	AT1G52560 | HSP20-like chaperones superfamily protein	C2
FtPinG0001425400.01	36.7164	24.324	58.0608	18.098	48.2993	43.333	73.2208	59.9522	33.0272	78.19	85.5866	117.519	XP_015898755.1|zinc finger CCCH domain-containing protein 18 [Ziziphus jujuba]	AT2G05160 | CCCH-type zinc fingerfamily protein with RNA-binding domain	C2
FtPinG0005942900.01	35.6965	25.3375	54.0566	56.305	79.1791	65.4809	92.0207	89.9282	30.8964	85.5491	82.7017	95.3455	XP_010668078.1|PREDICTED: pentatricopeptide repeat-containing protein At5g13770, chloroplastic [Beta vulgaris subsp. vulgaris]	AT5G13770 | Pentatricopeptide repeat (PPR-like) superfamily protein	C2
FtPinG0005721000.01	35.6965	38.513	51.0535	129.703	60.9679	46.2218	39.5788	100.634	67.1197	84.6292	152.902	105.324	OWM82312.1|hypothetical protein CDL15_Pgr001886 [Punica granatum]	AT3G55410 | 2-oxoglutarate dehydrogenase, E1 component	C2
FtPinG0001773500.01	35.6965	64.8641	43.0451	142.773	98.1821	53.9255	59.3682	83.5048	133.174	81.8695	121.168	114.193	XP_021835548.1|U-box domain-containing protein 26 [Spinacia oleracea]	AT5G11550 | ARM repeat superfamily protein	C2
FtPinG0005300000.01	33.6567	36.486	57.0598	27.147	53.05	73.1846	25.7262	44.9641	25.5694	73.5906	85.5866	117.519	AHF22835.1|drimenol oxidase 1 [Persicaria hydropiper]	AT2G45580 | CYP76C3 , cytochrome P450, family 76, subfamily C, polypeptide 3	C2
FtPinG0004353200.01	33.6567	16.216	34.0357	53.2887	38.006	41.4071	34.6315	39.6112	59.662	56.1128	69.2386	72.0635	XP_021722528.1|U11/U12 small nuclear ribonucleoprotein 65 kDa protein-like [Chenopodium quinoa]	AT1G09230 | RNA-binding (RRM/RBD/RNP motifs) family protein	C2
FtPinG0004635500.01	32.6368	46.621	60.0629	190.029	117.185	55.8514	72.2313	290.126	236.517	184.896	394.275	208.43	XP_003552529.1|ATP-dependent zinc metalloprotease FTSH 6, chloroplastic [Glycine max]	AT5G15250 | FTSH6, ATFTSH6 , FTSH protease 6	C2
FtPinG0007680500.01	32.6368	30.405	32.0336	38.207	43.5485	36.5923	36.6104	51.3876	43.6811	65.3117	70.2003	64.3028	XP_010679683.1|PREDICTED: DUF21 domain-containing protein At2g14520-like isoform X1 [Beta vulgaris subsp. vulgaris]	AT2G14520 | CBS domain-containing protein with a domain of unknown function (DUF21)	C2
FtPinG0002226500.01	31.6169	22.297	40.0419	43.2342	34.047	24.0739	56.3998	29.9761	12.7847	68.9912	124.052	53.2161	CAA71244.1|cyclin-D like protein [Oxybasis rubra]	AT2G22490 | CYCD2;1, ATCYCD2;1 , Cyclin D2;1	C2
FtPinG0005255000.01	31.6169	18.243	25.0262	38.207	61.7597	19.2591	55.4103	52.4581	64.989	41.3947	100.011	78.7155	XP_010256092.1|PREDICTED: uncharacterized protein LOC104596560 [Nelumbo nucifera]	AT4G14819 | Protein of unknown function (DUF1677)	C2
FtPinG0004218000.01	30.597	25.3375	28.0294	36.1961	64.9269	44.2959	21.7683	223.75	182.182	102.107	116.359	109.758	XP_022767588.1|ribulose bisphosphate carboxylase/oxygenase activase 2, chloroplastic-like isoform X1 [Durio zibethinus]	AT2G39730 | RCA , rubisco activase	C2
FtPinG0007118700.01	29.5771	39.5265	27.0283	154.839	72.8448	35.6293	79.1576	101.705	90.5584	87.3888	129.822	66.5201	-	-	C2
FtPinG0003345600.01	29.5771	29.3915	21.022	80.4357	48.2993	54.8884	53.4314	73.8696	49.0081	61.6321	86.5483	72.0635	XP_009618542.1|PREDICTED: ethylene-responsive transcription factor 4-like [Nicotiana tomentosiformis]	AT5G44210 | ERF9, ATERF9, ATERF-9 , erf domain protein 9	C2
FtPinG0005737600.01	29.5771	31.4185	21.022	77.4194	41.1731	29.8516	70.2524	43.8935	58.5966	73.5906	67.3153	45.4554	XP_021760955.1|pentatricopeptide repeat-containing protein At3g09040, mitochondrial-like [Chenopodium quinoa]	AT3G09040 | Pentatricopeptide repeat (PPR) superfamily protein	C2
FtPinG0004455700.01	29.5771	20.27	21.022	22.1198	15.8358	17.3332	32.6525	21.4115	21.3079	47.8339	97.1264	74.2808	XP_010671943.1|PREDICTED: tetraketide alpha-pyrone reductase 1-like [Beta vulgaris subsp. vulgaris]	AT5G19440 | NAD(P)-binding Rossmann-fold superfamily protein	C2
FtPinG0006647800.01	26.5174	14.189	29.0304	125.681	55.4254	21.185	47.4946	54.5993	28.7656	66.2315	107.704	33.2601	XP_006602560.1|plasma membrane ATPase 2-like [Glycine max]	AT3G47950 | AHA4, HA4 , H(+)-ATPase 4	C2
FtPinG0001062500.01	25.4975	17.2295	19.0199	41.2233	27.7127	27.9257	43.5367	72.7991	62.8582	59.7924	91.3565	44.3468	XP_022771146.1|protein LIFEGUARD 2-like [Durio zibethinus]	AT1G03070 | Bax inhibitor-1 family protein	C2
FtPinG0001693600.01	23.4577	39.5265	29.0304	36.1961	30.0881	60.6662	40.5683	107.057	102.278	133.383	135.592	139.692	KNA17615.1|hypothetical protein SOVF_077790 [Spinacia oleracea]	AT4G30420 | nodulin MtN21 /EamA-like transporter family protein	C2
FtPinG0004854700.01	23.4577	46.621	7.00734	24.1307	65.7187	36.5923	56.3998	131.681	145.959	141.662	83.6633	237.255	XP_010683193.1|PREDICTED: kunitz trypsin inhibitor 2 [Beta vulgaris subsp. vulgaris]	AT1G73260 | ATKTI1, KTI1 , kunitz trypsin inhibitor 1	C2
FtPinG0001053600.01	22.4378	21.2835	33.0346	30.1634	93.4314	33.7034	32.6525	23.5526	64.989	70.831	100.973	46.5641	KZV28501.1|hypothetical protein F511_15581 [Dorcoceras hygrometricum]	AT3G28857 | basic helix-loop-helix (bHLH) DNA-binding family protein	C2
FtPinG0006528000.01	21.4179	33.4455	64.0671	192.04	193.197	96.2955	98.947	248.373	392.065	395.549	473.13	653.006	XP_021845636.1|putative lipid-transfer protein DIR1 [Spinacia oleracea]	AT5G05960 | Bifunctional inhibitor/lipid-transfer protein/seed storage 2S albumin superfamily protein	C2
FtPinG0002253700.01	20.398	8.10801	11.0115	214.16	159.942	22.148	49.4735	87.7871	315.356	70.831	382.736	86.4762	XP_010688493.1|PREDICTED: probable cysteine protease RD19D [Beta vulgaris subsp. vulgaris]	AT3G54940 | Papain family cysteine protease	C2
FtPinG0007044900.01	19.3781	38.513	12.0126	144.784	60.1761	52.9625	42.5472	119.904	220.536	133.383	92.3181	70.9548	PKI65522.1|hypothetical protein CRG98_014022 [Punica granatum]	AT1G79180 | ATMYB63, MYB63 , myb domain protein 63	C2
FtPinG0005875600.01	18.3582	16.216	15.0157	106.577	63.3433	34.6664	60.3577	57.811	101.212	55.1929	90.3948	73.1722	XP_021751277.1|NAC domain-containing protein 104-like [Chenopodium quinoa]	AT5G64530 | ANAC104, XND1 , xylem NAC domain 1	C2
FtPinG0008455800.01	17.3383	14.189	11.0115	535.903	254.957	49.1107	105.873	210.903	446.4	136.143	426.01	97.5629	XP_021675096.1|translocator protein homolog [Hevea brasiliensis]	AT2G47770 | ATTSPO, TSPO , TSPO(outer membrane tryptophan-rich sensory protein)-related	C2
FtPinG0007163300.01	15.2985	7.09451	8.00839	10.0545	26.9209	11.5555	11.8736	41.7524	28.7656	22.0772	31.7344	66.5201	ATO91434.1|putative cytochrome P450 [Fallopia multiflora]	AT4G31970 | CYP82C2 , cytochrome P450, family 82, subfamily C, polypeptide 2	C2
FtPinG0006334100.01	14.2786	19.2565	24.0252	35.1906	40.3813	34.6664	21.7683	64.2345	60.7274	81.8695	150.017	89.8022	XP_021738413.1|clathrin coat assembly protein AP180-like [Chenopodium quinoa]	AT1G05020 | ENTH/ANTH/VHS superfamily protein	C2
FtPinG0007311700.01	14.2786	12.162	11.0115	167.91	74.4284	29.8516	47.4946	87.7871	54.335	57.0327	151.94	63.1941	ASL68825.1|phosphoenolpyruvate carboxylase kinase [Amaranthus tricolor]	AT1G08650 | PPCK1, ATPPCK1 , phosphoenolpyruvate carboxylase kinase 1	C2
FtPinG0006304700.01	13.2587	32.432	20.021	53.2887	69.6776	39.4812	77.1787	124.187	112.932	109.466	132.707	120.845	ALT04747.1|hypothetical protein [Beta vulgaris]	AT2G45550 | CYP76C4 , cytochrome P450, family 76, subfamily C, polypeptide 4	C2
FtPinG0009513400.01	13.2587	15.2025	19.0199	113.615	93.4314	33.7034	45.5156	59.9522	45.8119	76.3502	68.277	56.5421	XP_010691968.1|PREDICTED: protein ECERIFERUM 1 [Beta vulgaris subsp. vulgaris]	AT1G02205 | CER1 , Fatty acid hydroxylase superfamily	C2
FtPinG0004227500.01	13.2587	3.0405	12.0126	39.2124	10.2933	16.3702	10.8842	26.7644	21.3079	129.703	25.9645	134.149	AFN57631.1|sesquiterpene synthase, partial [Persicaria minor]	AT5G23960 | TPS21 , terpene synthase 21	C2
FtPinG0006100700.01	13.2587	29.3915	10.0105	38.207	23.7537	18.2961	31.663	22.4821	23.4386	56.1128	54.8139	47.6728	KNA18110.1|hypothetical protein SOVF_073770 [Spinacia oleracea]	AT2G28970 | Leucine-rich repeat protein kinase family protein	C2
FtPinG0008785800.01	13.2587	5.0675	10.0105	17.0926	42.7567	14.4443	23.7473	36.3995	23.4386	48.7538	75.0085	75.3895	PSR85159.1|Inactive beta-amylase [Actinidia chinensis var. chinensis]	AT5G18670 | BMY3, BAM9 , beta-amylase 3	C2
FtPinG0008693300.01	13.2587	12.162	9.00944	52.2832	18.2112	10.5925	33.642	29.9761	19.1771	34.9555	52.8906	45.4554	-	-	C2
FtPinG0008127400.01	9.1791	2.027	18.0189	76.4139	15.044	5.77773	40.5683	26.7644	2.13079	73.5906	98.088	11.0867	-	-	C2
FtPinG0001457400.01	9.1791	5.0675	18.0189	35.1906	38.006	22.148	28.6946	18.1998	6.39236	40.4748	56.7372	28.8254	XP_006342817.1|PREDICTED: uncharacterized protein LOC102587874 [Solanum tuberosum]	AT5G49120 | Protein of unknown function (DUF581)	C2
FtPinG0002298000.01	9.1791	23.3105	14.0147	156.85	68.094	18.2961	41.5577	62.0933	132.109	34.0357	148.094	53.2161	PON69170.1|hypothetical protein TorRG33x02_259970 [Trema orientale]	AT5G45690 | Protein of unknown function (DUF1264)	C2
FtPinG0005014000.01	8.1592	16.216	8.00839	37.2015	22.1702	20.2221	20.7789	118.834	50.0735	34.9555	108.666	62.0855	XP_021744357.1|17.1 kDa class II heat shock protein-like [Chenopodium quinoa]	AT5G12020 | HSP17.6II , 17.6 kDa class II heat shock protein	C2
FtPinG0005522700.01	8.1592	11.1485	6.00629	28.1525	31.6716	25.9998	12.8631	29.9761	49.0081	21.1573	49.044	22.1734	XP_021727178.1|uncharacterized protein LOC110694312 [Chenopodium quinoa]	AT5G17190 | FUNCTIONS IN: molecular_function unknown; INVOLVED IN: intracellular protein transport; LOCATED IN: endomembrane system, integral to membrane, endoplasmic reticulum; EXPRESSED IN: 23 plant structures; EXPRESSED DURING: 13 growth stages; CONTAINS InterPro DOMAIN/s: B-cell receptor-associated 31-like (InterPro:IPR008417); BEST Arabidopsis thaliana protein match is: unknown protein (TAIR…	C2
FtPinG0006852000.01	7.1393	6.081	11.0115	36.1961	14.2522	13.4814	4.94735	25.6938	8.52314	27.5965	56.7372	24.3907	XP_009354827.1|PREDICTED: probable glutathione S-transferase [Pyrus x bretschneideri]	AT1G78340 | ATGSTU22, GSTU22 , glutathione S-transferase TAU 22	C2
FtPinG0006697700.01	6.1194	20.27	11.0115	86.4684	67.3022	19.2591	43.5367	63.1639	135.305	32.1959	171.173	39.9121	KNA13408.1|hypothetical protein SOVF_117290 [Spinacia oleracea]	AT1G61070 | LCR66, PDF2.4 , low-molecular-weight cysteine-rich 66	C2
FtPinG0005612800.01	6.1194	12.162	11.0115	65.354	23.7537	12.5184	0.98947	48.1758	30.8964	37.7152	48.0824	24.3907	XP_026401729.1|protein TIC 20-I, chloroplastic-like [Papaver somniferum]	AT1G04940 | TIC20 , translocon at the inner envelope membrane of chloroplasts 20	C2
FtPinG0004448000.01	6.1194	4.054	9.00944	3.01634	11.8769	13.4814	31.663	37.4701	17.0463	22.0772	42.3125	31.0427	XP_015875060.1|psbP domain-containing protein 7, chloroplastic isoform X1 [Ziziphus jujuba]	AT3G05410 | Photosystem II reaction center PsbP family protein	C2
FtPinG0006679900.01	6.1194	6.081	0	87.4738	60.9679	11.5555	6.92629	52.4581	90.5584	17.4778	175.981	36.5861	AAG01171.1|seed oleosin isoform 1 [Fagopyrum esculentum]	AT3G01570 | Oleosin family protein	C2
FtPinG0005155500.01	6.1194	3.0405	0	24.1307	19.003	13.4814	20.7789	14.988	6.39236	40.4748	30.7727	17.7387	PON80852.1|camphor resistance CrcB family protein [Trema orientale]	AT2G41705 | camphor resistance CrcB family protein	C2
FtPinG0002481600.01	5.0995	8.10801	13.0136	271.47	82.3463	18.2961	37.5999	194.845	138.501	98.4274	416.393	59.8681	XP_023919929.1|uncharacterized protein LOC112031465 [Quercus suber]	AT5G01300 | PEBP (phosphatidylethanolamine-binding protein) family protein	C2
FtPinG0005969000.01	5.0995	5.0675	7.00734	14.0762	13.4604	13.4814	11.8736	11.7763	19.1771	22.0772	34.6193	14.4127	AKI81899.1|FRUITFUL-like protein [Fagopyrum esculentum]	AT5G60910 | AGL8, FUL , AGAMOUS-like 8	C2
FtPinG0006674700.01	5.0995	9.12151	6.00629	22.1198	20.5866	8.6666	71.2419	10.7057	29.831	27.5965	39.4275	16.63	PSR89581.1|Inactive poly [ADP-ribose] polymerase SRO2 [Actinidia chinensis var. chinensis]	AT5G62520 | SRO5 , similar to RCD one 5	C2
FtPinG0003401000.01	5.0995	22.297	4.00419	62.3377	52.2582	32.7405	7.91576	49.2464	206.686	30.3561	169.25	32.1514	XP_010679062.1|PREDICTED: late embryogenesis abundant protein 31 [Beta vulgaris subsp. vulgaris]	AT3G22500 | ATECP31 , Seed maturation protein	C2
FtPinG0005230000.01	4.0796	6.081	8.00839	43.2342	19.7948	12.5184	24.7368	36.3995	71.3813	22.9971	67.3153	29.9341	XP_010063276.1|PREDICTED: outer envelope pore protein 16-2, chloroplastic [Eucalyptus grandis]	AT4G16160 | ATOEP16-2, ATOEP16-S , Mitochondrial import inner membrane translocase subunit Tim17/Tim22/Tim23 family protein	C2
FtPinG0001180500.01	4.0796	6.081	6.00629	48.2614	14.2522	17.3332	30.6736	47.1053	91.6238	44.1544	50.0057	60.9768	XP_022720234.1|glutathione S-transferase T1-like [Durio zibethinus]	AT5G41210 | ATGSTT1, GST10, GSTT1 , glutathione S-transferase THETA 1	C2
FtPinG0006021400.01	4.0796	13.1755	4.00419	130.708	55.4254	11.5555	15.8315	48.1758	118.259	38.6351	128.861	27.7167	XP_023639589.1|uncharacterized protein LOC111830941 [Capsella rubella]	AT2G38905 | Low temperature and salt responsive protein family	C2
FtPinG0003146400.01	4.0796	11.1485	3.00315	152.828	112.434	8.6666	26.7157	74.9402	294.048	22.0772	477.939	44.3468	XP_010695677.1|PREDICTED: 11-beta-hydroxysteroid dehydrogenase 1B-like [Beta vulgaris subsp. vulgaris]	AT5G50700 | HSD1 , hydroxysteroid dehydrogenase 1	C2
FtPinG0005857300.01	4.0796	1.0135	2.0021	31.1688	12.6687	6.74069	14.8421	8.56459	36.2234	6.43918	48.0824	21.0647	PIN01478.1|Reductase [Handroanthus impetiginosus]	AT1G54870 | NAD(P)-binding Rossmann-fold superfamily protein	C2
FtPinG0001030000.01	4.0796	1.0135	1.00105	24.1307	10.2933	6.74069	6.92629	6.42345	20.2425	12.8784	30.7727	6.65201	OMO64477.1|hypothetical protein CCACVL1_21718 [Corchorus capsularis]	AT1G27461 | unknown protein; Has 30201 Blast hits to 17322 proteins in 780 species: Archae - 12; Bacteria - 1396; Metazoa - 17338; Fungi - 3422; Plants - 5037; Viruses - 0; Other Eukaryotes - 2996 (source: NCBI BLink).	C2
FtPinG0008432100.01	3.0597	7.09451	9.00944	54.2941	22.9619	19.2591	13.8526	36.3995	40.4849	25.7567	81.74	36.5861	XP_010685804.1|PREDICTED: uncharacterized protein LOC104900146 [Beta vulgaris subsp. vulgaris]	AT1G07645 | ATDSI-1VOC, DSI-1VOC , dessication-induced 1VOC superfamily protein	C2
FtPinG0003258100.01	3.0597	12.162	4.00419	133.724	41.9649	9.62955	25.7262	46.0347	102.278	34.9555	74.0468	41.0208	XP_021295835.1|ras-related protein RABC2a-like isoform X1 [Herrania umbratica]	AT5G03530 | ATRAB ALPHA, ATRAB, ATRAB18B, ATRABC2A, RABC2A , RAB GTPase homolog C2A	C2
FtPinG0008340600.01	3.0597	1.0135	0	24.1307	13.4604	0	14.8421	4.2823	12.7847	10.1187	31.7344	7.76068	XP_010671510.1|PREDICTED: uncharacterized protein LOC104888288 [Beta vulgaris subsp. vulgaris]	AT5G24130 | unknown protein; FUNCTIONS IN: molecular_function unknown; INVOLVED IN: biological_process unknown; LOCATED IN: mitochondrion; EXPRESSED IN: petal, leaf whorl, flower; EXPRESSED DURING: 4 anthesis, petal differentiation and expansion stage; Has 1807 Blast hits to 1807 proteins in 277 species: Archae - 0; Bacteria - 0; Metazoa - 736; Fungi - 347; Plants - 385; Viruses - 0; Other Eukary…	C2
FtPinG0001202200.01	2.0398	11.1485	4.00419	863.678	429.943	58.7403	90.0418	489.252	766.017	170.178	1222.25	149.67	XP_010024874.1|PREDICTED: late embryogenesis abundant protein D-29 [Eucalyptus grandis]	-	C2
FtPinG0005321900.01	1.0199	0	1.00105	20.1089	5.54254	0	4.94735	8.56459	39.4195	13.7982	35.5809	3.32601	XP_010687268.1|PREDICTED: aquaporin TIP3-1 [Beta vulgaris subsp. vulgaris]	AT1G73190 | ALPHA-TIP, TIP3;1 , Aquaporin-like superfamily protein	C2
FtPinG0002269700.01	0	8.10801	5.00524	7.03812	18.2112	19.2591	28.6946	26.7644	63.9236	28.5164	15.3864	32.1514	XP_008371241.1|PREDICTED: B-box domain protein 31-like [Malus domestica]	AT4G27310 | B-box type zinc finger family protein	C2
FtPinG0000835100.01	0	6.081	3.00315	239.296	13.4604	30.8146	2.96841	154.163	128.913	22.9971	133.669	25.4994	AMP82908.1|RACK1C [Catalpa bungei]	AT2G34610 | unknown protein; BEST Arabidopsis thaliana protein match is: unknown protein (TAIR:AT1G30190.1); Has 342 Blast hits to 279 proteins in 74 species: Archae - 0; Bacteria - 7; Metazoa - 76; Fungi - 18; Plants - 51; Viruses - 0; Other Eukaryotes - 190 (source: NCBI BLink).	C2
FtPinG0000335900.01	0	2.027	3.00315	0	2.37537	2.88887	5.93682	21.4115	10.6539	20.2374	29.8111	14.4127	EOX95553.1|Homeodomain-like superfamily protein isoform 2 [Theobroma cacao]	AT1G01060 | LHY, LHY1 , Homeodomain-like superfamily protein	C2
FtPinG0003983300.01	0	1.0135	0	0	5.54254	0	33.642	0	10.6539	0.919882	37.5042	96.4542	APC63890.1|lipid transfer protein H [Linum usitatissimum]	AT4G12520 | Bifunctional inhibitor/lipid-transfer protein/seed storage 2S albumin superfamily protein	C2
FtPinG0004805400.01	7800.2	5572.23	10140.6	2631.25	4914.65	4609.67	5504.42	2443.05	2962.86	5832.05	9856.88	12024.6	AEQ37175.1|xyloglucan endotransglucosylase/hydrolase [Diospyros kaki]	AT4G14130 | XTR7, XTH15 , xyloglucan endotransglucosylase/hydrolase 15	C3
FtPinG0006166100.01	6214.25	4725.95	5841.12	1082.87	3850.48	3684.27	2459.82	1496.66	1671.6	1423.06	2658.95	4280.57	XP_022847858.1|xyloglucan endotransglucosylase/hydrolase protein 9-like isoform X1 [Olea europaea var. sylvestris]	AT4G03210 | XTH9 , xyloglucan endotransglucosylase/hydrolase 9	C3
FtPinG0000553000.01	5562.54	7482.68	9790.26	2628.24	6993.1	7600.6	3762.96	3430.12	3363.44	2927.07	4882.28	6911.44	ART67214.1|aquaporin TIP1-3 [Vitis quinquangularis]	AT2G36830 | GAMMA-TIP, TIP1;1, GAMMA-TIP1 , gamma tonoplast intrinsic protein	C3
FtPinG0007749400.01	4450.84	3756.03	4152.35	1365.4	4443.53	2981.31	2808.12	1354.28	1337.07	1596.92	2394.5	2606.48	-	-	C3
FtPinG0005577300.01	4312.14	5257.03	3884.07	2585	2920.13	3123.83	2187.72	1836.03	1815.43	3220.51	3244.6	2794.95	KMT20052.1|hypothetical protein BVRB_1g000710 [Beta vulgaris subsp. vulgaris]	AT1G22710 | SUC2, SUT1, ATSUC2 , sucrose-proton symporter 2	C3
FtPinG0008195700.01	3715.5	4657.04	7265.61	960.201	4225	3903.82	2218.39	2402.37	1956.06	2725.61	5143.85	6057.77	XP_012828579.1|PREDICTED: 36.4 kDa proline-rich protein-like [Erythranthe guttata]	AT2G10940 | Bifunctional inhibitor/lipid-transfer protein/seed storage 2S albumin superfamily protein	C3
FtPinG0006135400.01	2788.41	1962.14	3011.15	239.296	1300.91	1242.21	631.282	436.794	473.034	469.14	1214.56	789.372	XP_021725011.1|inositol oxygenase 1-like [Chenopodium quinoa]	AT1G14520 | MIOX1 , myo-inositol oxygenase 1	C3
FtPinG0007073300.01	1988.81	2074.64	1635.71	1355.34	1286.66	983.177	839.071	684.097	875.753	1001.75	1059.74	899.131	XP_015074490.1|PREDICTED: AP2/ERF and B3 domain-containing transcription factor RAV1 [Solanum pennellii]	AT1G25560 | TEM1, EDF1 , AP2/B3 transcription factor family protein	C3
FtPinG0001471200.01	1902.11	1547.62	1537.61	790.281	1661.18	1442.51	1149.76	604.874	451.727	691.752	1197.25	1510.01	XP_021865220.1|linoleate 13S-lipoxygenase 3-1, chloroplastic-like [Spinacia oleracea]	AT1G17420 | LOX3 , lipoxygenase 3	C3
FtPinG0004261700.01	1586.96	610.127	3114.26	107.583	704.694	458.367	281.999	270.855	199.228	717.508	883.754	793.807	XP_010094323.1|putative beta-D-xylosidase [Morus notabilis]	AT5G49360 | BXL1, ATBXL1 , beta-xylosidase 1	C3
FtPinG0009798600.01	1325.87	1046.95	1877.97	201.089	156.775	300.442	260.231	187.35	376.084	418.547	1224.18	973.411	XP_010668001.1|PREDICTED: probable xyloglucan endotransglucosylase/hydrolase protein 23 [Beta vulgaris subsp. vulgaris]	AT5G57560 | TCH4, XTH22 , Xyloglucan endotransglucosylase/hydrolase family protein	C3
FtPinG0006919600.01	1299.35	1607.41	1655.73	229.242	928.771	1265.32	409.641	306.184	281.264	366.113	695.271	1196.25	XP_010062007.1|PREDICTED: gibberellin-regulated protein 9 [Eucalyptus grandis]	AT1G22690 | Gibberellin-regulated family protein	C3
FtPinG0009528600.01	1296.29	1147.28	1342.41	730.959	952.525	998.584	647.114	477.476	524.173	692.672	767.395	742.808	XP_021904689.1|hypersensitive-induced reaction 1 protein [Carica papaya]	AT5G62740 | HIR1, ATHIR1 , SPFH/Band 7/PHB domain-containing membrane-associated protein family	C3
FtPinG0001117100.01	1161.67	1738.15	2231.34	535.903	1260.53	1999.09	1022.12	807.213	613.666	791.099	930.875	1054.34	XP_016690451.1|PREDICTED: 36.4 kDa proline-rich protein-like [Gossypium hirsutum]	AT2G10940 | Bifunctional inhibitor/lipid-transfer protein/seed storage 2S albumin superfamily protein	C3
FtPinG0004173900.01	742.487	519.926	796.835	349.895	425.192	357.256	280.02	256.938	297.245	410.268	505.826	600.899	XP_016187510.1|E3 ubiquitin-protein ligase MIEL1 [Arachis ipaensis]	AT5G22920 | CHY-type/CTCHY-type/RING-type Zinc finger protein	C3
FtPinG0003535500.01	698.632	698.302	787.825	204.106	399.855	392.886	297.831	278.349	320.683	413.027	469.284	393.577	PNT38665.1|hypothetical protein POPTR_005G251300v3 [Populus trichocarpa]	AT2G30600 | BTB/POZ domain-containing protein	C3
FtPinG0008621600.01	671.094	505.737	672.705	99.5392	250.998	249.405	303.767	175.574	202.425	234.57	417.355	394.686	XP_021773884.1|protein trichome birefringence-like 41 [Chenopodium quinoa]	AT3G14850 | TBL41 , TRICHOME BIREFRINGENCE-LIKE 41	C3
FtPinG0004283200.01	629.278	472.291	1147.2	355.928	377.684	213.776	341.367	232.315	140.632	356.914	618.339	519.966	XP_021753238.1|protein EXORDIUM-like 5 [Chenopodium quinoa]	AT2G17230 | EXL5 , EXORDIUM like 5	C3
FtPinG0009799600.01	598.681	483.44	438.459	712.861	374.517	237.85	302.778	176.645	176.855	234.57	625.071	422.403	XP_018848556.1|PREDICTED: cysteine proteinase inhibitor B-like [Juglans regia]	AT2G31980 | AtCYS2, CYS2 , PHYTOCYSTATIN 2	C3
FtPinG0004055100.01	544.627	368.914	589.618	175.953	226.452	205.109	326.525	196.986	227.994	337.597	487.555	421.294	XP_021658603.1|uncharacterized protein LOC110648621 [Hevea brasiliensis]	AT4G32480 | Protein of unknown function (DUF506)	C3
FtPinG0001496800.01	537.487	347.631	802.841	240.302	552.67	423.7	332.462	278.349	192.836	354.155	440.434	491.14	XP_021772077.1|WEB family protein At5g16730, chloroplastic-like [Chenopodium quinoa]	AT1G65010 | Plant protein of unknown function (DUF827)	C3
FtPinG0006397800.01	509.95	570.601	453.475	267.449	369.766	320.664	227.578	226.962	172.594	251.128	238.489	253.885	GAV82821.1|OPT domain-containing protein [Cephalotus follicularis]	AT4G27730 | ATOPT6, OPT6 , oligopeptide transporter 1	C3
FtPinG0008470300.01	452.836	241.213	500.524	49.2669	164.693	46.2218	52.4419	102.775	57.5312	96.5877	286.571	284.928	ONI28536.1|hypothetical protein PRUPE_1G146600 [Prunus persica]	AT4G15530 | PPDK , pyruvate orthophosphate dikinase	C3
FtPinG0008438400.01	448.756	280.74	522.547	187.013	158.358	192.591	211.747	172.362	158.744	322.879	439.473	369.187	OMO50876.1|hypothetical protein CCACVL1_30180 [Corchorus capsularis]	AT1G10020 | Protein of unknown function (DUF1005)	C3
FtPinG0004896600.01	442.637	371.955	305.32	162.882	152.024	197.406	239.452	194.845	247.171	292.523	383.697	507.77	PKI44897.1|hypothetical protein CRG98_034845, partial [Punica granatum]	AT5G67480 | BT4, ATBT4 , BTB and TAZ domain protein 4	C3
FtPinG0007411000.01	432.438	350.671	400.419	167.91	188.446	178.147	231.536	144.528	102.278	142.582	245.22	257.211	XP_021842886.1|putative potassium transporter 12 [Spinacia oleracea]	AT1G60160 | Potassium transporter family protein	C3
FtPinG0008213400.01	392.662	630.397	443.465	155.844	549.503	228.22	150.399	142.386	178.986	325.638	664.498	267.189	XP_021656920.1|polygalacturonase inhibitor-like [Hevea brasiliensis]	AT5G06860 | PGIP1, ATPGIP1 , polygalacturonase inhibiting protein 1	C3
FtPinG0009754700.01	375.323	339.523	335.351	229.242	134.604	170.443	20.7789	147.739	126.782	249.288	236.565	443.468	XP_021627426.1|probable xyloglucan endotransglucosylase/hydrolase protein 23 [Manihot esculenta]	AT5G57560 | TCH4, XTH22 , Xyloglucan endotransglucosylase/hydrolase family protein	C3
FtPinG0008435400.01	373.284	279.726	535.561	154.839	311.174	249.405	222.631	196.986	99.0815	293.443	367.349	294.906	AUS89402.1|fasciclin-like arabinogalactan family protein [Sesuvium portulacastrum]	AT3G46550 | SOS5 , Fasciclin-like arabinogalactan family protein	C3
FtPinG0002848900.01	340.647	324.32	191.2	165.899	193.989	165.628	147.431	127.398	102.278	308.161	148.094	100.889	XP_002516533.1|receptor-like protein kinase HSL1 [Ricinus communis]	AT5G25930 | Protein kinase family protein with leucine-rich repeat domain	C3
FtPinG0007023700.01	330.448	238.173	387.406	108.588	312.757	137.703	184.041	101.705	79.9045	152.7	327.922	245.016	XP_021756750.1|pectinesterase/pectinesterase inhibitor PPE8B-like [Chenopodium quinoa]	AT3G43270 | Plant invertase/pectin methylesterase inhibitor superfamily	C3
FtPinG0005141600.01	300.871	108.445	463.486	71.3867	169.443	94.3696	105.873	41.7524	58.5966	121.424	99.0497	82.0415	XP_027125765.1|F-box/kelch-repeat protein At1g80440 [Coffea arabica]	AT1G80440 | Galactose oxidase/kelch repeat superfamily protein	C3
FtPinG0008627800.01	283.532	393.238	426.447	104.566	380.06	303.331	221.641	153.092	166.201	227.211	338.5	606.442	XP_010675381.2|PREDICTED: epidermis-specific secreted glycoprotein EP1-like [Beta vulgaris subsp. vulgaris]	AT1G78860 | D-mannose binding lectin protein with Apple-like carbohydrate-binding domain	C3
FtPinG0007792500.01	279.453	294.929	384.403	43.2342	182.112	195.48	157.326	98.4928	70.3159	101.187	261.568	178.496	XP_010679361.1|PREDICTED: probable beta-D-xylosidase 2 [Beta vulgaris subsp. vulgaris]	AT1G02640 | BXL2, ATBXL2 , beta-xylosidase 2	C3
FtPinG0001345200.01	278.433	259.456	346.363	189.024	210.616	173.332	171.178	98.4928	75.6429	138.902	261.568	202.886	PHU05757.1|hypothetical protein BC332_26579 [Capsicum chinense]	AT4G39500 | CYP96A11 , cytochrome P450, family 96, subfamily A, polypeptide 11	C3
FtPinG0009795500.01	260.075	364.86	245.257	211.144	137.772	123.258	116.757	72.7991	118.259	344.956	390.429	256.103	XP_010668001.1|PREDICTED: probable xyloglucan endotransglucosylase/hydrolase protein 23 [Beta vulgaris subsp. vulgaris]	AT4G25810 | XTR6, XTH23 , xyloglucan endotransglycosylase 6	C3
FtPinG0004643300.01	248.856	203.714	263.276	75.4085	153.607	80.8882	133.578	69.5873	71.3813	119.585	181.751	84.2588	XP_021847428.1|LOW QUALITY PROTEIN: receptor-like protein 2 [Spinacia oleracea]	AT1G17240 | AtRLP2, RLP2 , receptor like protein 2	C3
FtPinG0009346400.01	242.736	239.186	305.32	107.583	171.819	207.998	113.789	118.834	140.632	149.021	113.474	220.625	XP_010274674.1|PREDICTED: serine carboxypeptidase-like 50 [Nelumbo nucifera]	AT1G15000 | scpl50 , serine carboxypeptidase-like 50	C3
FtPinG0001270900.01	227.438	179.39	359.376	116.632	109.267	117.481	148.421	98.4928	113.997	162.819	282.724	215.082	EOY15613.1|Formin-like protein 18 [Theobroma cacao]	AT1G10020 | Protein of unknown function (DUF1005)	C3
FtPinG0005971200.01	219.279	378.036	395.414	52.2832	281.086	378.441	144.463	117.763	149.155	106.706	191.368	254.994	XP_012470819.1|PREDICTED: PLASMODESMATA CALLOSE-BINDING PROTEIN 2-like [Gossypium raimondii]	AT5G61130 | PDCB1 , plasmodesmata callose-binding protein 1	C3
FtPinG0005766100.01	207.04	391.211	203.213	93.5065	136.188	126.147	111.81	130.61	91.6238	516.054	250.99	167.409	XP_023920183.1|uncharacterized protein LOC112031709 [Quercus suber]	AT4G05200 | CRK25 , cysteine-rich RLK (RECEPTOR-like protein kinase) 25	C3
FtPinG0006789000.01	194.801	325.334	377.395	249.351	437.069	178.147	104.884	102.775	99.0815	240.089	311.574	361.426	XP_021845836.1|sugar carrier protein C-like [Spinacia oleracea]	AT1G11260 | STP1, ATSTP1 , sugar transporter 1	C3
FtPinG0003608700.01	188.682	518.912	277.29	42.2287	210.616	339.923	124.673	65.305	55.4004	60.7122	162.518	202.886	XP_021620099.1|GDSL esterase/lipase LTL1-like [Manihot esculenta]	AT5G33370 | GDSL-like Lipase/Acylhydrolase superfamily protein	C3
FtPinG0009737600.01	186.642	402.36	90.0944	282.53	158.358	106.888	77.1787	99.5634	71.3813	191.336	178.866	66.5201	XP_007041033.2|PREDICTED: uncharacterized protein LOC18607023 [Theobroma cacao]	AT4G39720 | VQ motif-containing protein	C3
FtPinG0003209600.01	183.582	380.063	234.245	208.127	207.449	262.887	109.831	157.374	102.278	264.006	197.138	141.91	XP_021908825.1|sulfite exporter TauE/SafE family protein 4 [Carica papaya]	AT2G36630 | Sulfite exporter TauE/SafE family protein	C3
FtPinG0002804100.01	174.403	197.633	188.197	156.85	143.314	86.666	43.5367	65.305	70.3159	121.424	57.6988	100.889	XP_021825654.1|purine permease 21-like [Prunus avium]	AT4G18210 | ATPUP10, PUP10 , purine permease 10	C3
FtPinG0001662000.01	172.363	115.539	203.213	87.4738	163.109	132.888	89.0523	69.5873	67.1197	114.065	204.831	178.496	-	-	C3
FtPinG0008957400.01	168.284	340.536	647.679	54.2941	170.235	276.368	82.126	188.421	137.436	171.098	201.946	507.77	XP_021598985.1|21 kDa protein-like [Manihot esculenta]	AT2G01610 | Plant invertase/pectin methylesterase inhibitor superfamily protein	C3
FtPinG0003572200.01	144.826	119.593	203.213	53.2887	80.7627	110.74	71.2419	59.9522	40.4849	86.469	99.0497	103.106	XP_024024198.1|uncharacterized protein LOC21398933 [Morus notabilis]	AT3G07470 | Protein of unknown function, DUF538	C3
FtPinG0009683400.01	141.766	145.944	170.178	40.2179	57.8008	83.7771	8.90523	61.0227	55.4004	374.392	258.683	481.162	XP_021757407.1|probable xyloglucan endotransglucosylase/hydrolase protein 6 [Chenopodium quinoa]	AT5G65730 | XTH6 , xyloglucan endotransglucosylase/hydrolase 6	C3
FtPinG0002088200.01	140.746	183.444	105.11	189.024	98.9739	99.1844	72.2313	59.9522	50.0735	133.383	111.551	101.998	XP_010681187.1|PREDICTED: leucine-rich repeat receptor protein kinase EMS1 [Beta vulgaris subsp. vulgaris]	AT5G42440 | Protein kinase superfamily protein	C3
FtPinG0004014300.01	133.607	124.661	192.201	62.3377	86.3052	116.518	52.4419	95.2811	47.9427	97.5075	115.398	92.0195	XP_010667922.1|PREDICTED: probable serine/threonine-protein kinase WNK11 [Beta vulgaris subsp. vulgaris]	AT5G55560 | Protein kinase superfamily protein	C3
FtPinG0004744800.01	128.507	285.807	111.116	117.637	257.332	67.4069	70.2524	63.1639	62.8582	144.422	321.19	114.193	XP_015868036.1|polygalacturonase inhibitor-like [Ziziphus jujuba]	AT5G06860 | PGIP1, ATPGIP1 , polygalacturonase inhibiting protein 1	C3
FtPinG0006790900.01	127.488	137.836	149.156	17.0926	72.053	38.5182	47.4946	80.2931	61.7928	74.5105	115.398	85.3675	XP_010686091.1|PREDICTED: beta-galactosidase 1 [Beta vulgaris subsp. vulgaris]	AT3G13750 | BGAL1 , beta galactosidase 1	C3
FtPinG0005799600.01	118.308	101.35	148.155	34.1852	42.7567	47.1848	52.4419	28.9055	26.6348	62.552	72.1235	33.2601	GAU29757.1|hypothetical protein TSUD_161620 [Trifolium subterraneum]	-	C3
FtPinG0000367400.01	109.129	78.0396	126.132	27.147	91.056	106.888	47.4946	44.9641	29.831	53.3532	94.2414	83.1502	-	-	C3
FtPinG0003986200.01	108.109	101.35	115.121	37.2015	76.0119	73.1846	39.5788	53.5287	28.7656	34.0357	73.0852	60.9768	XP_009377653.1|PREDICTED: protodermal factor 1-like [Pyrus x bretschneideri]	AT2G42840 | PDF1 , protodermal factor 1	C3
FtPinG0005187800.01	108.109	126.688	108.113	100.545	99.7657	89.5548	71.2419	55.6699	37.2887	81.8695	112.513	53.2161	XP_023900121.1|elongation of fatty acids protein 3-like [Quercus suber]	AT4G36830 | HOS3-1 , GNS1/SUR4 membrane protein family	C3
FtPinG0006079700.01	95.8706	112.499	119.125	76.4139	66.5105	77.9994	69.2629	55.6699	36.2234	57.0327	73.0852	72.0635	XP_010680662.1|PREDICTED: fructokinase-like 2, chloroplastic [Beta vulgaris subsp. vulgaris]	AT1G69200 | FLN2 , fructokinase-like 2	C3
FtPinG0005852200.01	92.8109	159.12	131.137	15.0817	32.4634	74.1475	25.7262	12.8469	54.335	78.19	31.7344	42.1294	KNA03090.1|hypothetical protein SOVF_212470 [Spinacia oleracea]	AT5G07220 | ATBAG3, BAG3 , BCL-2-associated athanogene 3	C3
FtPinG0006348000.01	92.8109	195.606	90.0944	139.757	160.734	53.9255	53.4314	57.811	47.9427	171.098	124.052	77.6068	KNA04656.1|hypothetical protein SOVF_197620 [Spinacia oleracea]	AT1G30700 | FAD-binding Berberine family protein	C3
FtPinG0004575900.01	90.7711	48.648	61.064	26.1416	22.9619	26.9627	23.7473	20.3409	20.2425	28.5164	36.5426	38.8034	XP_017640292.1|PREDICTED: uncharacterized protein LOC108481707 [Gossypium arboreum]	AT3G43110 | unknown protein; FUNCTIONS IN: molecular_function unknown; INVOLVED IN: biological_process unknown; LOCATED IN: endomembrane system; EXPRESSED IN: petal, flower; EXPRESSED DURING: 4 anthesis, petal differentiation and expansion stage; BEST Arabidopsis thaliana protein match is: unknown protein (TAIR:AT5G20790.1); Has 30 Blast hits to 30 proteins in 10 species: Archae - 0; Bacteria - 0…	C3
FtPinG0009236800.01	89.7512	61.8235	139.146	50.2723	82.3463	56.8144	31.663	46.0347	42.6157	65.3117	77.8934	104.215	XP_010650875.1|PREDICTED: uncharacterized protein At3g28850 [Vitis vinifera]	AT5G58530 | Glutaredoxin family protein	C3
FtPinG0008931600.01	85.6716	182.43	128.134	99.5392	239.121	131.925	62.3366	46.0347	72.4467	73.5906	169.25	85.3675	XP_008386683.1|PREDICTED: probable pectinesterase/pectinesterase inhibitor 7 [Malus domestica]	AT1G02810 | Plant invertase/pectin methylesterase inhibitor superfamily	C3
FtPinG0002380600.01	77.5124	114.526	113.119	56.305	68.8858	51.0366	33.642	38.5407	19.1771	62.552	103.858	108.65	PQQ18021.1|putative RNA-binding protein ARP1 isoform X3 [Prunus yedoensis var. nudiflora]	AT3G54770 | RNA-binding (RRM/RBD/RNP motifs) family protein	C3
FtPinG0005512300.01	70.3731	96.2826	102.107	6.03268	30.0881	36.5923	47.4946	26.7644	27.7002	40.4748	66.3537	36.5861	XP_010678488.1|PREDICTED: thioredoxin-like 1-2, chloroplastic [Beta vulgaris subsp. vulgaris]	AT5G61440 | ACHT5 , atypical CYS HIS rich thioredoxin 5	C3
FtPinG0004321300.01	69.3532	45.6075	63.0661	74.403	110.851	73.1846	26.7157	26.7644	9.58853	102.107	56.7372	80.9328	XP_017407917.1|PREDICTED: GDSL esterase/lipase At4g10955-like [Vigna angularis]	AT5G24180 | Lipase class 3-related protein	C3
FtPinG0000954000.01	65.2736	146.958	48.0503	60.3268	69.6776	43.333	20.7789	16.0586	35.158	111.306	109.628	53.2161	XP_020538911.1|probable LRR receptor-like serine/threonine-protein kinase At1g53440 isoform X2 [Jatropha curcas]	AT1G53440 | Leucine-rich repeat transmembrane protein kinase	C3
FtPinG0007036800.01	62.2139	79.0531	110.115	24.1307	45.1321	54.8884	18.7999	12.8469	28.7656	50.5935	15.3864	26.6081	XP_021857452.1|WAT1-related protein At5g40240-like [Spinacia oleracea]	AT3G28050 | nodulin MtN21 /EamA-like transporter family protein	C3
FtPinG0003240900.01	62.2139	67.9046	105.11	26.1416	60.9679	38.5182	34.6315	29.9761	24.504	22.9971	50.0057	44.3468	XP_027084183.1|uncharacterized protein LOC113706473 [Coffea arabica]	AT2G27770 | Plant protein of unknown function (DUF868)	C3
FtPinG0000019600.01	59.1542	34.459	40.0419	10.0545	19.003	16.3702	16.821	18.1998	5.32696	20.2374	63.4687	43.2381	PLY84864.1|hypothetical protein LSAT_4X151221 [Lactuca sativa]	-	C3
FtPinG0007322200.01	57.1144	72.9721	66.0692	45.2451	55.4254	52.9625	37.5999	24.6232	28.7656	34.9555	57.6988	39.9121	AZA07822.1|cyclin T1 [Vaccinium corymbosum]	AT5G45190 | Cyclin family protein	C3
FtPinG0008213200.01	56.0945	118.58	86.0902	29.1579	61.7597	37.5552	22.7578	26.7644	41.5503	39.5549	71.1619	52.1074	PSS15639.1|Polygalacturonase [Actinidia chinensis var. chinensis]	AT5G06860 | PGIP1, ATPGIP1 , polygalacturonase inhibiting protein 1	C3
FtPinG0001707100.01	55.0746	31.4185	53.0556	10.0545	41.9649	37.5552	11.8736	17.1292	22.3732	21.1573	24.0412	42.1294	XP_006374996.1|protein MIZU-KUSSEI 1 [Populus trichocarpa]	AT5G42680 | Protein of unknown function, DUF617	C3
FtPinG0008278700.01	50.995	110.472	78.0818	2.01089	21.3784	43.333	12.8631	24.6232	28.7656	74.5105	29.8111	22.1734	RAL51392.1|hypothetical protein DM860_010894 [Cuscuta australis]	AT1G12540 | basic helix-loop-helix (bHLH) DNA-binding superfamily protein	C3
FtPinG0000019300.01	48.9552	42.567	54.0566	17.0926	41.9649	55.8514	7.91576	8.56459	7.45775	33.1158	35.5809	56.5421	XP_011028852.1|PREDICTED: protein RADIALIS-like 5 [Populus euphratica]	AT1G75250 | ATRL6, RSM3, RL6 , RAD-like 6	C3
FtPinG0004899100.01	45.8955	26.351	41.043	5.02723	11.0851	32.7405	17.8105	6.42345	5.32696	12.8784	20.1946	16.63	RDX76471.1|hypothetical protein CR513_43532 [Mucuna pruriens]	AT5G67620 | unknown protein; FUNCTIONS IN: molecular_function unknown; INVOLVED IN: N-terminal protein myristoylation; LOCATED IN: microtubule; BEST Arabidopsis thaliana protein match is: unknown protein (TAIR:AT5G62900.1); Has 1807 Blast hits to 1807 proteins in 277 species: Archae - 0; Bacteria - 0; Metazoa - 736; Fungi - 347; Plants - 385; Viruses - 0; Other Eukaryotes - 339 (source: NCBI BLin…	C3
FtPinG0009011500.01	42.8358	286.821	70.0734	31.1688	136.98	12.5184	28.6946	14.988	39.4195	54.2731	41.3508	92.0195	XP_021742552.1|mediator of RNA polymerase II transcription subunit 37a-like [Chenopodium quinoa]	AT5G42020 | BIP, BIP2 , Heat shock protein 70 (Hsp 70) family protein	C3
FtPinG0002132900.01	42.8358	25.3375	49.0514	18.098	34.8388	25.0368	11.8736	13.9175	11.7193	16.5579	15.3864	33.2601	XP_021830997.1|aldehyde oxidase GLOX1-like [Prunus avium]	AT1G75620 | glyoxal oxidase-related protein	C3
FtPinG0005141700.01	42.8358	29.3915	47.0493	11.0599	13.4604	9.62955	15.8315	14.988	8.52314	36.7953	45.1974	7.76068	XP_022149111.1|ureide permease 2-like [Momordica charantia]	AT2G03530 | UPS2, ATUPS2 , ureide permease 2	C3
FtPinG0002875000.01	41.8159	59.7965	27.0283	8.04357	19.7948	33.7034	13.8526	11.7763	12.7847	19.3175	66.3537	41.0208	XP_019236895.1|PREDICTED: uncharacterized protein LOC109217118 isoform X2 [Nicotiana attenuata]	AT3G14200 | Chaperone DnaJ-domain superfamily protein	C3
FtPinG0008272700.01	37.7363	23.3105	63.0661	1.00545	9.50149	32.7405	2.96841	2.14115	3.19618	15.638	9.61647	12.1954	PSS09355.1|ABC transporter C family member 10 like [Actinidia chinensis var. chinensis]	AT3G59140 | ATMRP14, MRP14, ABCC10 , multidrug resistance-associated protein 14	C3
FtPinG0005631800.01	33.6567	46.621	92.0965	8.04357	21.3784	61.6291	6.92629	12.8469	19.1771	22.9971	11.5398	16.63	XP_021773909.1|trifunctional UDP-glucose 4,6-dehydratase/UDP-4-keto-6-deoxy-D-glucose 3,5-epimerase/UDP-4-keto-L-rhamnose-reductase RHM1 [Chenopodium quinoa]	AT1G78570 | RHM1, ROL1, ATRHM1 , rhamnose biosynthesis 1	C3
FtPinG0004666200.01	23.4577	162.16	44.0461	4.02179	57.009	53.9255	23.7473	16.0586	14.9155	18.3976	26.9261	35.4774	XP_023881434.1|ornithine decarboxylase-like [Quercus suber]	AT5G11880 | Pyridoxal-dependent decarboxylase family protein	C3
FtPinG0002671400.01	15.2985	42.567	9.00944	5.02723	8.7097	20.2221	2.96841	2.14115	2.13079	133.383	36.5426	35.4774	XP_011042443.1|PREDICTED: 3-ketoacyl-CoA synthase 19-like [Populus euphratica]	AT1G01120 | KCS1 , 3-ketoacyl-CoA synthase 1	C3
FtPinG0007033200.01	11.2189	15.2025	70.0734	6.03268	26.1291	14.4443	0	1.07057	2.13079	17.4778	26.9261	21.0647	XP_010029216.1|PREDICTED: xyloglucan glycosyltransferase 4 [Eucalyptus grandis]	AT3G28180 | ATCSLC04, CSLC04, ATCSLC4, CSLC4 , Cellulose-synthase-like C4	C3
FtPinG0000545200.01	8.1592	10.135	11.0115	0	0.791791	7.70364	0	0	0	0.919882	1.92329	0	XP_027122942.1|omega-hydroxypalmitate O-feruloyl transferase-like [Coffea arabica]	AT5G41040 | HXXXD-type acyl-transferase family protein	C3
FtPinG0002620800.01	3933.76	4746.22	3368.53	6888.31	4924.15	4803.22	6556.23	7520.78	10809.5	7866.83	4285.1	5444.67	XP_004496657.1|PREDICTED: ATP sulfurylase 1, chloroplastic [Cicer arietinum]	AT3G22890 | APS1 , ATP sulfurylase 1	C4
FtPinG0003199600.01	3155.57	5992.83	2725.86	3624.63	4051.6	4773.37	7365.62	7583.95	12437.4	11385.4	6399.76	5346	ACH63212.1|glutathione-S-transferase [Rheum australe]	AT5G02790 | GSTL3 , Glutathione S-transferase family protein	C4
FtPinG0005655500.01	2991.37	5016.83	3152.3	3963.47	3696.87	6160.99	7227.09	7346.28	9926.26	6270.84	4258.17	3216.25	XP_021601480.1|putative 12-oxophytodienoate reductase 11 [Manihot esculenta]	AT1G76680 | OPR1, ATOPR1 , 12-oxophytodienoate reductase 1	C4
FtPinG0006851000.01	2835.32	6369.85	1960.05	3676.92	2708.72	5670.84	6715.53	7926.53	14921.9	7270.75	3475.39	3432.44	ACH63238.1|glutathione-S-transferase 2 [Rheum australe]	AT1G78380 | ATGSTU19, GST8, GSTU19 , glutathione S-transferase TAU 19	C4
FtPinG0002078300.01	2325.37	4006.37	1985.08	2395.98	3121.24	4830.18	8478.77	10456.3	16347.4	12312.6	5718.92	4573.26	XP_010520884.1|PREDICTED: probable NAD(P)H dehydrogenase (quinone) FQR1-like 1 [Tarenaya hassleriana]	AT5G54500 | FQR1 , flavodoxin-like quinone reductase 1	C4
FtPinG0003070200.01	2115.27	5224.6	1591.67	3439.63	3770.51	5753.66	9591.92	10937	18086.1	10047.9	6022.8	5108.75	XP_022733171.1|probable aldo-keto reductase 2 [Durio zibethinus]	AT1G60730 | NAD(P)-linked oxidoreductase superfamily protein	C4
FtPinG0007566900.01	1851.12	3974.95	2360.47	801.341	2198.8	4671.3	4077.61	5766.11	9879.39	4849.62	1553.06	1809.35	XP_006487931.3|peroxidase 60 [Citrus sinensis]	AT5G17820 | Peroxidase superfamily protein	C4
FtPinG0004463000.01	1834.8	2813.48	1376.44	2572.94	2150.5	2833.98	3264.26	4037.14	5317.38	3974.81	3375.38	2286.08	XP_007201079.1|protein DMR6-LIKE OXYGENASE 2 [Prunus persica]	AT4G10490 | 2-oxoglutarate (2OG) and Fe(II)-dependent oxygenase superfamily protein	C4
FtPinG0004787900.01	1832.76	3051.65	1611.69	2320.57	2226.52	2388.13	3747.12	3997.52	6007.75	2827.72	2341.61	1969	XP_021773940.1|cytochrome P450 72A15-like [Chenopodium quinoa]	AT3G14690 | CYP72A15 , cytochrome P450, family 72, subfamily A, polypeptide 15	C4
FtPinG0005654900.01	1731.79	3215.84	1563.64	2366.82	2175.05	3377.08	6134.72	6591.53	9371.19	5296.68	2721.46	2833.76	XP_018504264.1|PREDICTED: putative 12-oxophytodienoate reductase 11 [Pyrus x bretschneideri]	AT1G76690 | OPR2, ATOPR2 , 12-oxophytodienoate reductase 2	C4
FtPinG0000533400.01	1705.27	3568.54	1458.53	1916.38	1669.1	3210.49	3746.13	4367.94	6937.84	4698.76	2193.52	1738.39	XP_021722221.1|glutathione S-transferase U8-like [Chenopodium quinoa]	AT3G09270 | ATGSTU8, GSTU8 , glutathione S-transferase TAU 8	C4
FtPinG0003186700.01	1494.15	2740.51	1106.16	1232.68	1152.06	2955.31	3120.79	3522.19	4998.82	2942.7	1326.11	1240.6	APY21161.1|UGT5 [Fagopyrum tataricum]	AT1G07250 | UGT71C4 , UDP-glucosyl transferase 71C4	C4
FtPinG0004637900.01	1481.92	1168.57	1282.34	1494.09	1728.48	1989.47	2683.44	2787.78	2415.25	2074.33	1928.1	2937.97	AJB84620.1|phytoene synthase [Camellia sinensis]	AT5G17230 | PSY , PHYTOENE SYNTHASE	C4
FtPinG0000983500.01	1471.72	3621.24	1041.09	1264.85	1894.76	3299.08	5041.35	6080.86	9035.6	5065.79	2476.24	2689.63	PON89150.1|NAD(P)-binding domain containing protein [Trema orientale]	AT5G19440 | NAD(P)-binding Rossmann-fold superfamily protein	C4
FtPinG0005349600.01	1396.24	2296.59	1266.33	2053.12	2337.37	2931.24	3190.05	3463.31	5100.04	3253.62	2140.63	1523.31	OMO82206.1|hypothetical protein COLO4_23160 [Corchorus olitorius]	AT4G01870 | tolB protein-related	C4
FtPinG0001106500.01	1388.08	1963.15	1553.63	1947.55	2212.26	2318.8	4582.24	4067.11	6886.7	2675.02	2122.36	2469.01	NP_001268171.1|uncharacterized protein LOC100260557 [Vitis vinifera]	AT4G39230 | NmrA-like negative transcriptional regulator family protein	C4
FtPinG0007163600.01	1365.65	2463.82	748.784	675.66	1132.26	2189.76	4596.09	5367.86	8144.93	5600.24	2238.71	2357.03	GAV65461.1|GST_C domain-containing protein/GST_N_3 domain-containing protein [Cephalotus follicularis]	AT3G09270 | ATGSTU8, GSTU8 , glutathione S-transferase TAU 8	C4
FtPinG0000680700.01	1274.88	1616.53	757.794	588.186	978.654	1314.43	5110.61	3201.02	2575.05	3189.23	886.639	939.043	XP_021756725.1|sucrose synthase [Chenopodium quinoa]	AT3G43190 | SUS4, ATSUS4 , sucrose synthase 4	C4
FtPinG0001254100.01	1087.21	995.258	1529.6	2720.74	1795.78	1490.65	1970.04	3393.72	2858.45	1966.71	2224.29	2130.86	OWM90377.1|hypothetical protein CDL15_Pgr014679 [Punica granatum]	AT1G74310 | ATHSP101, HSP101, HOT1 , heat shock protein 101	C4
FtPinG0004350600.01	1083.13	2148.62	1064.11	690.742	1178.19	2402.57	3306.81	3683.85	6157.97	2743.09	1438.62	1313.77	RDX88961.1|NADPH-dependent aldehyde reductase-like protein, chloroplastic, partial [Mucuna pruriens]	AT3G03980 | NAD(P)-binding Rossmann-fold superfamily protein	C4
FtPinG0003983600.01	1026.02	1325.66	813.853	911.94	699.152	832.956	1817.66	2067.28	2940.48	1087.3	809.707	751.678	XP_019054143.1|PREDICTED: small heat shock protein, chloroplastic-like isoform X1 [Nelumbo nucifera]	AT4G25200 | ATHSP23.6-MITO, HSP23.6-MITO , mitochondrion-localized small heat shock protein 23.6	C4
FtPinG0000533500.01	1010.72	2380.71	652.684	526.854	590.676	1462.73	3831.23	3908.67	7072.08	6202.77	2249.29	2165.23	ANO40005.1|glutathione S-transferase U45 [Populus yatungensis]	AT3G09270 | ATGSTU8, GSTU8 , glutathione S-transferase TAU 8	C4
FtPinG0003188900.01	977.064	1046.95	872.914	1358.36	1151.26	1187.32	1973.99	1815.69	2090.3	1612.55	1629.03	1441.27	GAY47977.1|hypothetical protein CUMW_108480 [Citrus unshiu]	AT1G27760 | SAT32, ATSAT32 , interferon-related developmental regulator family protein / IFRD protein family	C4
FtPinG0006888800.01	953.607	1246.61	567.595	841.559	942.231	1696.73	2258.96	2171.12	2270.35	2235.31	1179.94	934.608	XP_023881854.1|cellulose synthase-like protein E1 [Quercus suber]	AT1G55850 | ATCSLE1, CSLE1 , cellulose synthase like E1	C4
FtPinG0005573700.01	941.368	1140.19	920.965	1193.46	1105.34	1231.62	1963.11	2016.96	3026.78	1735.82	1427.08	1648.59	KEH35222.1|zinc metalloproteinase-like protein, putative [Medicago truncatula]	AT5G35690 | CONTAINS InterPro DOMAIN/s: WLM (InterPro:IPR013536), PUB domain (InterPro:IPR018997), PUG domain (InterPro:IPR006567); BEST Arabidopsis thaliana protein match is: zinc ion binding (TAIR:AT1G55915.1); Has 30201 Blast hits to 17322 proteins in 780 species: Archae - 12; Bacteria - 1396; Metazoa - 17338; Fungi - 3422; Plants - 5037; Viruses - 0; Other Eukaryotes - 2996 (source: NCBI BLin…	C4
FtPinG0007364700.01	930.149	1440.18	935.981	1331.21	1267.66	1605.25	2185.74	2155.07	2859.51	1717.42	1431.89	1345.92	XP_007042892.2|PREDICTED: bifunctional riboflavin biosynthesis protein RIBA 1, chloroplastic [Theobroma cacao]	AT5G64300 | ATGCH, GCH, ATRIBA1, RFD1 , GTP cyclohydrolase II	C4
FtPinG0004385000.01	903.632	1115.86	872.914	1290.99	910.56	1148.81	1744.44	1842.46	2438.68	1667.75	1295.34	1034.39	XP_021731701.1|probable 2-oxoglutarate-dependent dioxygenase At5g05600 [Chenopodium quinoa]	AT3G19000 | 2-oxoglutarate (2OG) and Fe(II)-dependent oxygenase superfamily protein	C4
FtPinG0005614600.01	857.736	1542.55	689.723	1074.82	1142.55	1416.51	2760.62	3035.08	5287.54	2343.86	1482.86	1609.79	Q96419.1|RecName: Full=Thioredoxin H-type; Short=Trx-H	AT3G51030 | ATTRX1, ATTRX H1, TRX1 , thioredoxin H-type 1	C4
FtPinG0005115000.01	830.199	801.679	957.003	1642.9	1132.26	957.177	1615.8	2049.08	1843.13	1432.26	1793.47	1832.63	XP_010670181.1|PREDICTED: chaperone protein ClpB3, chloroplastic [Beta vulgaris subsp. vulgaris]	AT5G15450 | APG6, CLPB3, CLPB-P , casein lytic proteinase B3	C4
FtPinG0001373100.01	811.841	772.288	914.959	611.311	1154.43	1188.29	2195.63	2373.46	2107.35	1034.87	1101.09	1569.88	XP_021907901.1|fructose-bisphosphate aldolase 1, chloroplastic [Carica papaya]	AT4G38970 | FBA2 , fructose-bisphosphate aldolase 2	C4
FtPinG0007466900.01	807.761	1159.44	725.76	312.694	496.453	1129.55	1818.65	1746.11	1961.39	1550.92	546.216	419.077	PSR89187.1|ABC transporter B family member 21 like [Actinidia chinensis var. chinensis]	AT1G02520 | PGP11 , P-glycoprotein 11	C4
FtPinG0008361200.01	804.701	1138.16	612.642	900.88	695.193	1020.73	2108.56	2206.45	2441.88	1791.01	1216.48	920.195	AXJ94102.1|NAC domain containing transcription factor NAC2 [Fagopyrum tataricum]	AT5G04410 | NAC2, anac078 , NAC domain containing protein 2	C4
FtPinG0002117200.01	792.463	1742.21	649.681	1003.44	887.598	1407.84	2751.72	3083.25	4873.11	2503	1398.24	1150.8	XP_002526194.1|microsomal glutathione S-transferase 3 [Ricinus communis]	AT1G65820 | microsomal glutathione s-transferase, putative	C4
FtPinG0009469200.01	780.224	851.341	552.579	2731.8	1278.74	844.512	4343.77	4274.8	6774.83	1797.45	1891.56	1606.46	XP_011094842.1|heat shock cognate 70 kDa protein 2 [Sesamum indicum]	AT5G02500 | HSC70-1, HSP70-1, AT-HSC70-1, HSC70 , heat shock cognate protein 70-1	C4
FtPinG0000544600.01	755.746	1610.45	967.013	998.408	1125.14	1360.66	1672.2	2425.92	4351.06	2624.42	1917.52	1291.6	XP_003634222.1|PREDICTED: omega-hydroxypalmitate O-feruloyl transferase [Vitis vinifera]	AT5G41040 | HXXXD-type acyl-transferase family protein	C4
FtPinG0000878600.01	730.249	988.163	669.702	1017.51	971.528	1067.92	3124.75	1573.74	2099.89	2832.32	1879.06	1542.16	XP_010676788.1|PREDICTED: pyruvate decarboxylase 2 [Beta vulgaris subsp. vulgaris]	AT4G33070 | Thiamine pyrophosphate dependent pyruvate decarboxylase family protein	C4
FtPinG0001039100.01	725.149	963.839	1207.26	1005.45	1180.56	1572.51	2471.7	2636.82	4132.66	1793.77	1203.02	1364.77	BAU59408.1|cytochrome P450 81AG1 [Fallopia sachalinensis]	AT3G28740 | CYP81D1 , Cytochrome P450 superfamily protein	C4
FtPinG0001894000.01	699.652	1243.57	572.6	519.816	711.82	1346.21	1295.22	1502.02	2543.09	947.479	665.46	486.706	XP_010673286.1|PREDICTED: probable aldo-keto reductase 2 [Beta vulgaris subsp. vulgaris]	AT1G60730 | NAD(P)-linked oxidoreductase superfamily protein	C4
FtPinG0008374300.01	696.592	1012.49	640.671	965.228	946.982	994.733	1504.98	1444.2	1838.87	1299.79	1234.76	1039.93	XP_010693402.1|PREDICTED: ALA-interacting subunit 3 [Beta vulgaris subsp. vulgaris]	AT3G12740 | ALIS1 , ALA-interacting subunit 1	C4
FtPinG0001524800.01	691.492	1524.31	797.836	1038.63	1148.1	1609.1	3264.26	3368.03	4553.49	2419.29	1557.87	1343.71	GAV72468.1|Abhydrolase_6 domain-containing protein [Cephalotus follicularis]	AT4G24160 | alpha/beta-Hydrolases superfamily protein	C4
FtPinG0006558400.01	687.413	601.006	792.831	675.66	1145.72	1133.4	1258.61	1960.22	1339.2	941.96	1072.24	1429.07	XP_021647432.1|photosystem II 22 kDa protein, chloroplastic-like [Hevea brasiliensis]	AT1G44575 | NPQ4, PSBS , Chlorophyll A-B binding family protein	C4
FtPinG0009470100.01	678.234	892.894	577.605	2213.99	1115.63	838.734	4292.32	4275.87	6141.99	1766.17	1739.62	1616.44	XP_011094842.1|heat shock cognate 70 kDa protein 2 [Sesamum indicum]	AT5G02500 | HSC70-1, HSP70-1, AT-HSC70-1, HSC70 , heat shock cognate protein 70-1	C4
FtPinG0003428200.01	678.234	1691.53	388.407	737.998	832.172	1692.88	2493.46	2859.5	4294.6	2587.63	1300.15	1105.34	XP_017217803.1|PREDICTED: glutathione S-transferase U8 [Daucus carota subsp. sativus]	AT3G09270 | ATGSTU8, GSTU8 , glutathione S-transferase TAU 8	C4
FtPinG0007261700.01	657.836	960.799	518.543	513.783	605.72	761.697	1902.75	1740.75	2389.68	1874.72	1078.01	798.242	XP_013663202.1|cinnamoyl-CoA reductase 1-like [Brassica napus]	AT5G19440 | NAD(P)-binding Rossmann-fold superfamily protein	C4
FtPinG0007956200.01	647.637	1764.5	697.731	358.944	711.028	1355.84	2160.01	2766.36	4763.37	2643.74	1909.83	1051.02	XP_002524760.1|non-specific lipid-transfer protein-like protein At2g13820 [Ricinus communis]	AT2G48130 | Bifunctional inhibitor/lipid-transfer protein/seed storage 2S albumin superfamily protein	C4
FtPinG0004507700.01	630.298	668.911	858.9	1366.4	912.143	737.624	1427.81	1800.71	1732.33	929.081	1077.04	1108.67	PON70323.1|ClpA/B family [Trema orientale]	AT1G74310 | ATHSP101, HSP101, HOT1 , heat shock protein 101	C4
FtPinG0005237100.01	620.099	753.031	314.329	917.972	433.11	704.883	1039.93	942.105	1655.62	640.238	531.791	670.745	PIN01392.1|hypothetical protein CDL12_26103 [Handroanthus impetiginosus]	AT3G27880 | Protein of unknown function (DUF1645)	C4
FtPinG0006700200.01	590.522	1171.61	502.526	972.267	874.137	1660.13	5941.77	6996.2	8624.35	7423.45	4480.31	3073.23	XP_016566290.1|PREDICTED: pirin-like protein [Capsicum annuum]	AT2G43120 | RmlC-like cupins superfamily protein	C4
FtPinG0008988100.01	580.323	1163.5	461.483	517.805	677.773	1269.17	2359.89	2632.54	4620.61	2111.13	963.571	925.739	XP_019430949.1|PREDICTED: protein RESPONSE TO LOW SULFUR 4-like [Lupinus angustifolius]	AT5G24660 | LSU2 , response to low sulfur 2	C4
FtPinG0008506900.01	573.184	1229.38	422.443	518.81	634.225	1110.29	2387.59	2689.28	4467.19	2265.67	1141.48	996.693	XP_021713460.1|uncharacterized protein LOC110681612 [Chenopodium quinoa]	AT5G64250 | Aldolase-type TIM barrel family protein	C4
FtPinG0001890500.01	568.084	679.046	757.794	1281.94	531.292	648.069	963.744	1793.21	2005.07	1017.39	943.376	1343.71	XP_018506187.1|PREDICTED: peptidyl-prolyl cis-trans isomerase FKBP65-like [Pyrus x bretschneideri]	AT3G25230 | ROF1, ATFKBP62, FKBP62 , rotamase FKBP 1	C4
FtPinG0007490600.01	566.045	494.588	542.568	166.904	500.412	1245.1	1201.22	975.293	1387.14	1167.33	107.704	664.093	NP_001238490.1|uncharacterized protein LOC100500207 precursor [Glycine max]	AT2G37870 | Bifunctional inhibitor/lipid-transfer protein/seed storage 2S albumin superfamily protein	C4
FtPinG0000003200.01	542.587	770.261	642.673	536.908	657.187	823.327	1405.05	1212.96	1362.64	912.523	554.87	605.333	XP_010241252.1|PREDICTED: sulfite reductase [ferredoxin], chloroplastic-like [Nelumbo nucifera]	AT5G04590 | SIR , sulfite reductase	C4
FtPinG0001616700.01	539.527	549.317	637.668	873.733	1031.7	823.327	1838.44	2317.79	1930.49	1601.52	1507.86	1124.19	XP_024163338.1|cinnamate beta-D-glucosyltransferase [Rosa chinensis]	AT4G15480 | UGT84A1 , UDP-Glycosyltransferase superfamily protein	C4
FtPinG0006350600.01	537.487	577.695	455.477	563.05	635.808	784.808	1238.82	1214.03	1714.22	757.983	787.589	664.093	XP_021761622.1|uncharacterized protein LOC110726450 [Chenopodium quinoa]	AT3G47550 | RING/FYVE/PHD zinc finger superfamily protein	C4
FtPinG0004398500.01	526.269	630.397	685.718	890.825	743.492	784.808	1028.06	1195.83	1526.71	698.191	673.153	822.632	XP_017649453.1|PREDICTED: pyridoxal 5'-phosphate synthase-like subunit PDX1.2 [Gossypium arboreum]	AT3G16050 | A37, ATPDX1.2, PDX1.2 , pyridoxine biosynthesis 1.2	C4
FtPinG0003869300.01	491.592	770.261	450.472	643.486	554.254	1098.73	1669.24	1531.99	3267.56	925.402	657.767	586.486	ANO40005.1|glutathione S-transferase U45 [Populus yatungensis]	AT3G09270 | ATGSTU8, GSTU8 , glutathione S-transferase TAU 8	C4
FtPinG0001319700.01	464.055	1397.62	307.322	1403.6	1053.87	1059.25	3019.86	3365.89	4568.4	2168.16	1734.81	1315.99	5Z0C_A|Chain A, Nerol dehydrogenase from Persicaria minor	AT4G37970 | ATCAD6, CAD6 , cinnamyl alcohol dehydrogenase 6	C4
FtPinG0006135100.01	455.895	759.112	291.305	419.271	601.761	833.919	1215.07	1344.64	2047.68	789.259	498.133	391.36	OVA08516.1|Phosphofructokinase domain [Macleaya cordata]	AT4G26270 | PFK3 , phosphofructokinase 3	C4
FtPinG0009669600.01	452.836	994.244	161.169	198.073	406.981	733.772	1457.49	1682.94	2519.65	1157.21	542.369	472.293	XP_021842990.1|pathogen-related protein-like [Spinacia oleracea]	AT1G78780 | pathogenesis-related family protein	C4
FtPinG0003229300.01	433.458	769.247	303.318	305.656	530.5	755.92	1610.86	1726.84	2190.45	1263	714.504	630.833	OVA00145.1|Cytochrome P450 [Macleaya cordata]	AT2G34490 | CYP710A2 , cytochrome P450, family 710, subfamily A, polypeptide 2	C4
FtPinG0006068500.01	418.159	554.385	327.343	751.068	580.383	524.811	816.313	930.329	1299.78	723.028	652.958	436.816	XP_002268089.1|PREDICTED: UDP-glycosyltransferase 89B2-like [Vitis vinifera]	AT1G73880 | UGT89B1 , UDP-glucosyl transferase 89B1	C4
FtPinG0003047100.01	412.04	684.113	356.373	334.814	380.852	692.365	956.818	1100.55	1405.25	664.155	611.608	457.88	XP_006369005.2|uncharacterized protein LOC18094607 [Populus trichocarpa]	AT2G01410 | NHL domain-containing protein	C4
FtPinG0000881200.01	412.04	1190.86	272.285	866.695	700.735	1087.18	2447.95	2723.54	5429.24	2488.28	1358.81	1332.62	XP_023878580.1|2-alkenal reductase (NADP(+)-dependent)-like isoform X1 [Quercus suber]	AT3G03080 | Zinc-binding dehydrogenase family protein	C4
FtPinG0001562600.01	408.98	563.506	387.406	464.516	422.816	515.181	850.944	790.084	1234.79	604.363	482.747	412.425	XP_010674998.1|PREDICTED: glutathione synthetase, chloroplastic [Beta vulgaris subsp. vulgaris]	AT5G27380 | GSH2, GSHB , glutathione synthetase 2	C4
FtPinG0002713800.01	401.841	516.885	364.382	405.195	422.025	488.218	750.018	911.059	1138.9	692.672	401.969	442.359	XP_021751767.1|PI-PLC X domain-containing protein At5g67130-like [Chenopodium quinoa]	AT4G36945 | PLC-like phosphodiesterases superfamily protein	C4
FtPinG0003336400.01	396.741	199.66	226.237	319.732	212.992	159.851	580.819	673.391	695.701	494.897	569.295	676.288	XP_018852883.1|PREDICTED: small heat shock protein, chloroplastic-like [Juglans regia]	AT4G27670 | HSP21 , heat shock protein 21	C4
FtPinG0007491000.01	394.701	614.181	359.376	146.795	426.775	1012.07	904.376	753.684	1343.46	811.336	157.71	432.381	XP_027097909.1|non-specific lipid-transfer protein 1 [Coffea arabica]	AT2G37870 | Bifunctional inhibitor/lipid-transfer protein/seed storage 2S albumin superfamily protein	C4
FtPinG0009352000.01	391.642	721.613	247.259	146.795	275.543	413.108	957.807	1023.47	1188.98	401.989	378.889	168.518	XP_010672352.1|PREDICTED: cytosolic sulfotransferase 8-like [Beta vulgaris subsp. vulgaris]	AT5G07010 | ATST2A, ST2A , sulfotransferase 2A	C4
FtPinG0000354500.01	387.562	660.803	483.507	993.381	761.703	1032.29	1337.76	1594.09	1823.95	1565.64	1002.04	796.024	BAP90371.1|UDP-glycose: glycosyltransferase UGT72B19 [Fagopyrum esculentum]	AT4G01070 | GT72B1, UGT72B1 , UDP-Glycosyltransferase superfamily protein	C4
FtPinG0004217100.01	379.403	440.873	375.393	595.224	426.775	367.849	599.619	916.412	975.9	539.051	529.868	623.072	PIN17070.1|Armadillo/beta-catenin-like repeat-containing protein [Handroanthus impetiginosus]	AT3G53800 | Fes1B , Fes1B	C4
FtPinG0005413500.01	378.383	440.873	312.327	609.3	383.227	426.589	842.039	782.59	1073.92	562.968	522.174	392.469	XP_018820990.1|PREDICTED: uncharacterized protein LOC108991269 isoform X1 [Juglans regia]	AT3G50910 | unknown protein; BEST Arabidopsis thaliana protein match is: unknown protein (TAIR:AT5G66480.1); Has 76 Blast hits to 75 proteins in 28 species: Archae - 0; Bacteria - 10; Metazoa - 7; Fungi - 2; Plants - 49; Viruses - 0; Other Eukaryotes - 8 (source: NCBI BLink).	C4
FtPinG0009502500.01	369.204	405.4	460.482	1191.45	635.016	502.663	2081.85	2544.76	3183.39	1350.39	2011.77	1416.88	PIN20286.1|Molecular chaperone (HSP90 family) [Handroanthus impetiginosus]	AT5G52640 | HSP81-1, ATHS83, HSP81.1, HSP83, ATHSP90.1, AtHsp90-1, HSP90.1 , heat shock protein 90.1	C4
FtPinG0002926400.01	347.786	272.632	452.474	530.876	591.468	521.922	1052.8	944.247	580.639	677.953	844.326	766.09	OWM84027.1|hypothetical protein CDL15_Pgr004458 [Punica granatum]	AT1G44446 | CH1, ATCAO, CAO , Pheophorbide a oxygenase family protein with Rieske [2Fe-2S] domain	C4
FtPinG0008834500.01	339.627	662.83	300.315	293.59	359.473	915.77	1980.92	1753.6	3180.2	995.313	587.566	488.923	XP_021674985.1|glutathione S-transferase T1-like [Hevea brasiliensis]	AT5G41210 | ATGSTT1, GST10, GSTT1 , glutathione S-transferase THETA 1	C4
FtPinG0008693100.01	303.93	298.983	278.292	679.682	292.963	301.405	493.746	578.11	768.148	439.704	619.301	519.966	XP_024464150.1|serine/arginine-rich splicing factor SR45a isoform X3 [Populus trichocarpa]	AT1G07350 | RNA-binding (RRM/RBD/RNP motifs) family protein	C4
FtPinG0005209200.01	295.771	517.899	324.34	350.901	257.332	553.699	1128	1101.62	1285.93	677.034	433.703	281.602	EOY06755.1|Ca2+-binding protein 1 [Theobroma cacao]	AT5G49480 | ATCP1, CP1 , Ca2+-binding protein 1	C4
FtPinG0006602600.01	284.552	512.831	278.292	317.721	323.843	375.552	1164.61	1086.63	1462.78	677.034	506.788	435.707	XP_012835477.1|PREDICTED: plant UBX domain-containing protein 8-like [Erythranthe guttata]	AT4G23040 | Ubiquitin-like superfamily protein	C4
FtPinG0008283700.01	282.512	424.657	260.273	285.547	598.594	501.7	1435.72	1379.97	1301.91	653.117	812.592	298.232	XP_010672126.1|PREDICTED: cellulose synthase-like protein E6 [Beta vulgaris subsp. vulgaris]	AT4G24010 | ATCSLG1, CSLG1 , cellulose synthase like G1	C4
FtPinG0005794400.01	281.492	250.335	253.265	96.5228	142.522	216.665	943.955	511.735	392.065	508.695	826.055	330.383	KVG61099.1|Fatty acid desaturase, type 2 [Cynara cardunculus var. scolymus]	AT1G43800 | Plant stearoyl-acyl-carrier-protein desaturase family protein	C4
FtPinG0005609400.01	280.473	567.56	252.264	315.71	233.578	649.995	1544.56	1431.36	2174.47	1152.61	679.885	644.137	OMP00425.1|Short-chain dehydrogenase/reductase SDR [Corchorus olitorius]	AT3G61220 | NAD(P)-binding Rossmann-fold superfamily protein	C4
FtPinG0002265300.01	280.473	478.372	233.244	358.944	244.663	399.626	1523.78	1263.28	1993.35	890.446	770.279	717.309	XP_008230667.1|PREDICTED: zinc finger AN1 domain-containing stress-associated protein 12 [Prunus mume]	AT3G28210 | PMZ, SAP12 , zinc finger (AN1-like) family protein	C4
FtPinG0004222100.01	276.393	645.6	178.187	266.443	372.934	608.588	1502.02	1612.28	2732.73	1240.92	605.838	603.116	APY21161.1|UGT5 [Fagopyrum tataricum]	AT1G07250 | UGT71C4 , UDP-glucosyl transferase 71C4	C4
FtPinG0007576700.01	268.234	618.235	338.354	356.933	938.272	979.325	2594.39	2769.58	3978.18	1297.95	818.362	699.57	XP_021764054.1|ATP sulfurylase 1, chloroplastic-like [Chenopodium quinoa]	AT3G22890 | APS1 , ATP sulfurylase 1	C4
FtPinG0004736200.01	268.234	454.048	263.276	477.587	376.893	413.108	813.345	810.425	666.936	774.541	531.791	381.382	PSR91224.1|Phospholipid-transporting ATPase 9 [Actinidia chinensis var. chinensis]	AT1G68710 | ATPase E1-E2 type family protein / haloacid dehalogenase-like hydrolase family protein	C4
FtPinG0004613100.01	265.174	297.969	274.287	409.217	308.007	280.22	486.819	519.229	763.887	259.407	306.765	320.405	XP_021624022.1|activator of 90 kDa heat shock protein ATPase homolog 1 [Manihot esculenta]	AT3G12050 | Aha1 domain-containing protein	C4
FtPinG0006007500.01	255.995	276.686	183.192	375.031	357.098	259.998	456.146	623.074	658.413	310.92	347.155	370.295	XP_021740679.1|aquaporin NIP6-1-like [Chenopodium quinoa]	AT1G80760 | NIP6;1, NIP6, NLM7 , NOD26-like intrinsic protein 6;1	C4
FtPinG0006927600.01	255.995	609.114	176.185	179.975	384.019	766.512	1156.69	1489.17	2408.85	1148.93	522.174	461.206	OMO56053.1|Methyltransferase type 11 [Corchorus olitorius]	AT5G10830 | S-adenosyl-L-methionine-dependent methyltransferases superfamily protein	C4
FtPinG0001394000.01	254.975	369.928	203.213	243.318	315.925	363.034	530.356	498.888	661.609	325.638	315.42	293.797	XP_021639945.1|probable inactive poly [ADP-ribose] polymerase SRO3 [Hevea brasiliensis]	AT2G35510 | SRO1 , similar to RCD one 1	C4
FtPinG0002140300.01	244.776	605.06	177.186	264.432	401.438	426.589	2388.58	2102.61	3060.87	1665.91	1003	738.374	XP_021613730.1|3-oxo-Delta(4,5)-steroid 5-beta-reductase-like [Manihot esculenta]	AT4G24220 | VEP1, AWI31 , NAD(P)-binding Rossmann-fold superfamily protein	C4
FtPinG0001181800.01	243.756	376.009	187.196	167.91	155.983	259.998	767.829	631.639	755.363	730.387	430.818	378.056	XP_007040200.2|PREDICTED: probable copper-transporting ATPase HMA5 [Theobroma cacao]	AT1G63440 | HMA5 , heavy metal atpase 5	C4
FtPinG0003999400.01	242.736	399.319	200.21	278.509	220.118	537.329	578.84	586.675	821.418	590.565	238.489	249.451	EEF47140.1|monoxygenase, putative [Ricinus communis]	AT4G15760 | MO1 , monooxygenase 1	C4
FtPinG0003186900.01	240.696	543.236	182.191	247.34	400.646	689.476	1572.27	1396.03	2163.81	1368.79	697.194	586.486	APY21161.1|UGT5 [Fagopyrum tataricum]	AT1G07250 | UGT71C4 , UDP-glucosyl transferase 71C4	C4
FtPinG0007162900.01	237.637	582.763	220.231	92.5011	184.487	493.033	1161.64	1204.4	1667.34	385.431	289.456	185.148	BAU59407.1|cytochrome P450 81B80 [Fallopia sachalinensis]	AT5G36220 | CYP81D1, CYP91A1 , cytochrome p450 81d1	C4
FtPinG0003212900.01	231.517	110.472	190.199	222.204	292.963	207.998	469.998	531.005	401.653	266.766	298.111	291.58	XP_016485385.1|PREDICTED: CBS domain-containing protein CBSCBSPB3-like isoform X1 [Nicotiana tabacum]	AT3G52950 | CBS / octicosapeptide/Phox/Bemp1 (PB1) domains-containing protein	C4
FtPinG0003153000.01	225.398	829.044	143.15	555.006	619.181	1041.92	1879	2056.57	2458.93	1618.99	860.674	733.939	XP_021643661.1|mitochondrial phosphate carrier protein 3, mitochondrial-like [Hevea brasiliensis]	AT3G48850 | PHT3;2 , phosphate transporter 3;2	C4
FtPinG0001729900.01	221.318	501.683	248.26	119.648	231.995	446.811	511.556	848.965	1528.84	927.242	863.559	411.316	EOX94707.1|Bifunctional inhibitor/lipid-transfer protein/seed storage 2S albumin superfamily protein [Theobroma cacao]	AT2G48130 | Bifunctional inhibitor/lipid-transfer protein/seed storage 2S albumin superfamily protein	C4
FtPinG0004558000.01	220.298	231.078	148.155	321.743	250.206	266.739	1523.78	1376.76	2366.24	461.781	519.29	396.903	XP_016647873.1|PREDICTED: BAG family molecular chaperone regulator 6-like [Prunus mume]	-	C4
FtPinG0006630000.01	220.298	741.883	122.128	354.923	431.526	804.068	1795.89	2175.41	2969.25	1304.39	567.372	664.093	XP_021728849.1|transmembrane protein 45A-like [Chenopodium quinoa]	AT1G55230 | Family of unknown function (DUF716)	C4
FtPinG0000533900.01	217.239	616.208	116.122	445.413	420.441	366.886	1484.21	1386.39	2789.2	1892.2	1103.97	1135.28	XP_021867104.1|glutathione S-transferase U8-like [Spinacia oleracea]	AT3G09270 | ATGSTU8, GSTU8 , glutathione S-transferase TAU 8	C4
FtPinG0007986900.01	211.119	261.483	199.209	359.95	260.499	359.182	372.041	583.463	867.23	382.671	340.423	303.775	XP_010026123.1|PREDICTED: uncharacterized protein At5g01610 [Eucalyptus grandis]	AT4G02370 | Protein of unknown function, DUF538	C4
FtPinG0004028700.01	211.119	298.983	134.141	174.948	205.866	284.072	432.398	465.7	669.067	359.674	185.598	226.168	CBI28868.3|unnamed protein product, partial [Vitis vinifera]	AT1G05000 | Phosphotyrosine protein phosphatases superfamily protein	C4
FtPinG0005896800.01	211.119	286.821	126.132	240.302	223.285	348.59	427.451	507.452	532.696	429.585	319.267	249.451	XP_021724157.1|uncharacterized protein LOC110691527 [Chenopodium quinoa]	AT2G41640 | Glycosyltransferase family 61 protein	C4
FtPinG0004013300.01	210.099	179.39	207.217	124.675	152.816	187.776	785.639	293.337	281.264	388.19	663.537	372.513	XP_017252995.1|PREDICTED: pyruvate decarboxylase 1 [Daucus carota subsp. sativus]	AT5G01320 | Thiamine pyrophosphate dependent pyruvate decarboxylase family protein	C4
FtPinG0006938400.01	195.821	338.509	149.156	221.198	191.613	298.516	532.335	660.544	881.08	611.722	393.314	322.623	PSR93082.1|Zinc finger protein [Actinidia chinensis var. chinensis]	AT2G37430 | C2H2 and C2HC zinc fingers superfamily protein	C4
FtPinG0006188100.01	193.781	439.859	179.188	68.3703	243.872	333.182	550.145	437.865	1098.42	367.033	178.866	177.387	XP_010680374.1|PREDICTED: probable mannitol dehydrogenase [Beta vulgaris subsp. vulgaris]	AT4G37970 | ATCAD6, CAD6 , cinnamyl alcohol dehydrogenase 6	C4
FtPinG0001713300.01	193.781	398.306	151.158	145.79	239.913	500.737	730.229	741.908	1019.58	327.478	176.943	151.888	XP_021720153.1|serine/threonine-protein kinase OXI1-like [Chenopodium quinoa]	AT3G25250 | AGC2-1, AGC2, OXI1, AtOXI1 , AGC (cAMP-dependent, cGMP-dependent and protein kinase C) kinase family protein	C4
FtPinG0008341900.01	190.721	350.671	123.129	182.991	180.528	243.628	664.924	831.836	923.696	347.716	297.149	223.951	XP_009604758.1|PREDICTED: eukaryotic initiation factor 4A-10 isoform X1 [Nicotiana tomentosiformis]	AT3G13920 | EIF4A1, RH4, TIF4A1 , eukaryotic translation initiation factor 4A1	C4
FtPinG0002030200.01	178.483	302.023	138.145	82.4466	141.731	235.924	402.714	486.041	582.77	298.962	186.56	116.41	XP_008387519.1|PREDICTED: UDP-glycosyltransferase 73C1-like [Malus domestica]	AT2G36800 | DOGT1, UGT73C5 , don-glucosyltransferase 1	C4
FtPinG0001300900.01	176.443	253.375	193.202	234.269	239.121	271.553	338.399	405.748	506.062	322.879	240.412	192.908	OMP11828.1|hypothetical protein COLO4_03668 [Corchorus olitorius]	AT1G07940 | GTP binding Elongation factor Tu family protein	C4
FtPinG0001741300.01	176.443	134.796	181.19	159.866	284.253	228.22	412.609	499.958	428.288	255.727	348.116	358.1	XP_003525338.1|uncharacterized protein LOC100809536 [Glycine max]	AT1G64500 | Glutaredoxin family protein	C4
FtPinG0009280200.01	176.443	338.509	146.153	268.454	227.244	247.479	486.819	584.534	544.416	378.072	294.264	207.321	XP_018830611.1|PREDICTED: carboxylesterase 1-like [Juglans regia]	AT5G62180 | AtCXE20, CXE20 , carboxyesterase 20	C4
FtPinG0008286200.01	176.443	277.699	144.151	168.915	160.734	254.22	415.577	449.641	606.208	296.202	184.636	208.43	XP_002277481.1|PREDICTED: uncharacterized protein LOC100260748 [Vitis vinifera]	AT1G32260 | unknown protein; FUNCTIONS IN: molecular_function unknown; INVOLVED IN: biological_process unknown; LOCATED IN: mitochondrion; EXPRESSED IN: 22 plant structures; EXPRESSED DURING: 13 growth stages; BEST Arabidopsis thaliana protein match is: unknown protein (TAIR:AT2G35480.1); Has 48 Blast hits to 48 proteins in 14 species: Archae - 0; Bacteria - 0; Metazoa - 0; Fungi - 0; Plants - 48…	C4
FtPinG0001830600.01	175.423	307.091	171.179	209.133	238.329	256.146	746.061	520.299	468.773	555.609	364.464	280.493	XP_023889747.1|alanine aminotransferase 2-like [Quercus suber]	AT1G72330 | ALAAT2 , alanine aminotransferase 2	C4
FtPinG0004766300.01	174.403	419.589	163.171	371.01	286.628	486.292	916.249	1027.75	1110.14	966.796	564.487	393.577	XP_010689965.1|PREDICTED: aspartic proteinase-like protein 2 [Beta vulgaris subsp. vulgaris]	AT5G22850 | Eukaryotic aspartyl protease family protein	C4
FtPinG0002876300.01	173.383	444.927	89.0933	179.975	374.517	349.553	485.83	1117.68	1077.11	1199.53	374.081	353.665	KNA22661.1|hypothetical protein SOVF_031390 [Spinacia oleracea]	AT1G30710 | FAD-binding Berberine family protein	C4
FtPinG0008437900.01	172.363	308.104	139.146	270.465	299.297	210.887	529.367	486.041	395.261	483.858	351.963	258.32	GAV76175.1|E1-E2_ATPase domain-containing protein/Cation_ATPase_C domain-containing protein/Cation_ATPase_N domain-containing protein/Hydrolase domain-containing protein/CaATP_NAI domain-containing protein [Cephalotus follicularis]	AT3G57330 | ACA11 , autoinhibited Ca2+-ATPase 11	C4
FtPinG0003006100.01	170.323	379.049	141.148	261.416	225.66	412.145	512.546	569.546	633.909	556.529	290.417	228.386	XP_021765621.1|uncharacterized acetyltransferase At3g50280-like [Chenopodium quinoa]	AT5G42830 | HXXXD-type acyl-transferase family protein	C4
FtPinG0004760900.01	166.244	207.768	201.211	511.772	272.376	222.443	619.408	937.823	1166.61	390.03	582.758	491.14	XP_021733363.1|dnaJ homolog subfamily B member 1-like [Chenopodium quinoa]	AT2G20560 | DNAJ heat shock family protein	C4
FtPinG0001039700.01	166.244	568.574	157.165	308.672	641.351	1171.92	1807.76	2371.32	2914.91	1015.55	689.501	527.726	BAU59408.1|cytochrome P450 81AG1 [Fallopia sachalinensis]	AT2G23190 | CYP81D7 , cytochrome P450, family 81, subfamily D, polypeptide 7	C4
FtPinG0003471700.01	166.244	256.416	141.148	628.404	338.887	753.994	1703.87	1752.53	2514.33	1846.2	1156.86	996.693	XP_009364628.1|PREDICTED: pirin-like protein [Pyrus x bretschneideri]	AT1G50590 | RmlC-like cupins superfamily protein	C4
FtPinG0009210300.01	151.965	256.416	116.122	146.795	228.036	266.739	374.02	356.501	597.685	264.926	173.097	169.626	OMO67753.1|hypothetical protein CCACVL1_20336 [Corchorus capsularis]	AT3G46540 | ENTH/VHS family protein	C4
FtPinG0001951500.01	149.925	359.793	160.168	200.084	247.039	335.108	290.904	589.886	1025.97	496.737	516.405	269.407	PSS01429.1|Non-specific lipid-transfer protein-like protein [Actinidia chinensis var. chinensis]	AT3G22600 | Bifunctional inhibitor/lipid-transfer protein/seed storage 2S albumin superfamily protein	C4
FtPinG0008510200.01	145.846	92.2286	30.0315	93.5065	55.4254	131.925	174.147	345.795	427.222	247.448	204.831	143.018	XP_010691023.1|PREDICTED: uncharacterized protein LOC104904467 [Beta vulgaris subsp. vulgaris]	AT2G15780 | Cupredoxin superfamily protein	C4
FtPinG0003915800.01	143.806	154.052	130.136	209.133	250.998	180.073	552.124	334.019	187.509	365.193	122.129	282.711	XP_010688054.1|PREDICTED: early nodulin-93-like [Beta vulgaris subsp. vulgaris]	AT5G25940 | early nodulin-related	C4
FtPinG0004548300.01	141.766	241.213	231.242	56.305	182.904	258.072	293.873	474.264	576.377	302.641	277.916	222.842	XP_002273875.2|PREDICTED: laccase-12 [Vitis vinifera]	AT5G05390 | LAC12 , laccase 12	C4
FtPinG0001390600.01	140.746	122.634	66.0692	200.084	70.4694	152.147	253.304	221.609	452.792	114.065	144.247	155.214	BAA21925.1|ZPT2-8 [Petunia x hybrida]	AT3G53600 | C2H2-type zinc finger family protein	C4
FtPinG0001448200.01	138.706	74.9991	93.0975	108.588	144.106	165.628	295.852	245.162	200.294	155.46	198.099	237.255	XP_010264265.1|PREDICTED: peroxisomal membrane protein 11-4 [Nelumbo nucifera]	AT3G47430 | PEX11B , peroxin 11B	C4
FtPinG0006451900.01	137.687	202.7	150.157	342.857	196.364	146.369	313.662	425.018	397.392	367.033	363.503	177.387	ARQ20678.1|mitochondrial glycerol-3-phosphate acyltransferase [Camellia oleifera]	AT1G06520 | ATGPAT1, GPAT1 , glycerol-3-phosphate acyltransferase 1	C4
FtPinG0002401400.01	137.687	216.889	125.131	345.874	157.566	134.814	867.765	873.589	1283.8	350.475	487.555	359.209	XP_012466103.1|PREDICTED: dnaJ protein homolog [Gossypium raimondii]	AT5G22060 | ATJ2, J2 , DNAJ homologue 2	C4
FtPinG0003111400.01	136.667	184.457	123.129	161.877	180.528	262.887	683.724	642.345	809.698	323.799	252.913	215.082	XP_010695210.1|PREDICTED: mitochondrial substrate carrier family protein E [Beta vulgaris subsp. vulgaris]	AT1G74240 | Mitochondrial substrate carrier family protein	C4
FtPinG0001972300.01	133.607	183.444	153.16	128.697	147.273	229.183	304.757	340.443	334.533	175.698	125.976	137.475	XP_010688836.1|PREDICTED: uncharacterized protein LOC104902676 [Beta vulgaris subsp. vulgaris]	AT2G43040 | NPG1 , tetratricopeptide repeat (TPR)-containing protein	C4
FtPinG0003306800.01	132.587	157.093	151.158	271.47	165.484	166.591	298.82	427.159	491.146	225.371	228.872	221.734	XP_006408982.1|dnaJ homolog subfamily B member 13 [Eutrema salsugineum]	AT2G20560 | DNAJ heat shock family protein	C4
FtPinG0003375900.01	132.587	153.039	145.152	37.2015	60.9679	80.8882	287.936	169.151	158.744	70.831	138.477	56.5421	PWA87581.1|lateral organ boundaries domain-containing protein [Artemisia annua]	AT3G02550 | LBD41 , LOB domain-containing protein 41	C4
FtPinG0000209300.01	126.468	147.971	118.124	96.5228	194.781	211.85	360.167	296.549	444.269	187.656	131.746	166.3	POO03510.1|Methyltransferase type [Trema orientale]	AT1G69523 | S-adenosyl-L-methionine-dependent methyltransferases superfamily protein	C4
FtPinG0004657000.01	125.448	407.427	68.0713	207.122	187.654	350.516	680.756	898.212	1013.19	597.004	325.037	226.168	XP_023896700.1|metalloendoproteinase 2-MMP-like [Quercus suber]	AT1G24140 | Matrixin family protein	C4
FtPinG0001576900.01	124.428	180.403	86.0902	171.931	155.983	195.48	238.462	252.656	366.495	264.926	172.135	151.888	XP_002517709.1|CBL-interacting serine/threonine-protein kinase 11 [Ricinus communis]	AT2G30360 | CIPK11, PKS5, SIP4, SNRK3.22 , SOS3-interacting protein 4	C4
FtPinG0007490800.01	123.408	155.066	135.142	37.2015	113.226	253.257	299.809	264.432	370.757	279.644	59.6221	160.757	KHN37154.1|hypothetical protein glysoja_038774 [Glycine soja]	AT2G37870 | Bifunctional inhibitor/lipid-transfer protein/seed storage 2S albumin superfamily protein	C4
FtPinG0004100800.01	120.348	149.998	111.116	125.681	130.646	149.258	244.399	260.15	262.087	139.822	108.666	92.0195	PSS03968.1|Mitochondrial carrier protein [Actinidia chinensis var. chinensis]	AT4G27940 | ATMTM1, MTM1 , manganese tracking factor for mitochondrial SOD2	C4
FtPinG0001211900.01	119.328	134.796	119.125	163.888	124.311	108.814	280.02	305.114	284.46	179.377	166.365	159.648	PSS04428.1|Mitochondrial carrier protein [Actinidia chinensis var. chinensis]	AT4G27940 | ATMTM1, MTM1 , manganese tracking factor for mitochondrial SOD2	C4
FtPinG0007253500.01	119.328	304.05	103.108	250.356	213.784	288.887	349.283	447.5	519.912	510.535	372.157	256.103	XP_021838029.1|NDR1/HIN1-like protein 6 [Spinacia oleracea]	AT5G36970 | NHL25 , NDR1/HIN1-like 25	C4
FtPinG0007187600.01	118.308	141.89	122.128	25.1362	133.021	133.851	184.041	243.02	350.514	171.098	50.9673	36.5861	XP_010683997.1|PREDICTED: endochitinase At2g43590 [Beta vulgaris subsp. vulgaris]	AT2G43590 | Chitinase family protein	C4
FtPinG0005432700.01	115.249	136.823	98.1028	66.3595	91.056	157.925	344.336	271.926	294.048	300.802	101.935	86.4762	XP_007225439.1|putative phospholipid-transporting ATPase 9 [Prunus persica]	AT1G68710 | ATPase E1-E2 type family protein / haloacid dehalogenase-like hydrolase family protein	C4
FtPinG0003335700.01	115.249	282.767	95.0996	167.91	205.074	210.887	691.64	634.851	1122.92	354.155	361.579	260.537	XP_022884000.1|uncharacterized protein LOC111400819 [Olea europaea var. sylvestris]	AT5G40690 | CONTAINS InterPro DOMAIN/s: EF-Hand 1, calcium-binding site (InterPro:IPR018247); BEST Arabidopsis thaliana protein match is: unknown protein (TAIR:AT2G41730.1); Has 1807 Blast hits to 1807 proteins in 277 species: Archae - 0; Bacteria - 0; Metazoa - 736; Fungi - 347; Plants - 385; Viruses - 0; Other Eukaryotes - 339 (source: NCBI BLink).	C4
FtPinG0003132100.01	111.169	411.481	100.105	178.969	186.863	332.22	952.86	1129.46	1961.39	1084.54	486.594	502.227	GAV87111.1|GST_C domain-containing protein/GST_N domain-containing protein [Cephalotus follicularis]	AT1G78380 | ATGSTU19, GST8, GSTU19 , glutathione S-transferase TAU 19	C4
FtPinG0007685500.01	110.149	148.985	73.0766	19.1035	68.8858	181.036	329.494	407.889	467.707	250.208	141.362	95.3455	XP_010695546.1|PREDICTED: transcription factor MYB39 [Beta vulgaris subsp. vulgaris]	AT5G16770 | AtMYB9, MYB9 , myb domain protein 9	C4
FtPinG0006077400.01	110.149	139.863	61.064	198.073	167.86	218.591	387.872	446.429	695.701	259.407	156.749	88.6935	XP_021774781.1|lysine histidine transporter-like 8 [Chenopodium quinoa]	AT1G47670 | Transmembrane amino acid transporter family protein	C4
FtPinG0007056300.01	109.129	244.254	117.123	158.861	179.737	292.738	458.125	366.136	357.972	306.321	166.365	105.324	XP_021759697.1|phospholipid-transporting ATPase 1-like [Chenopodium quinoa]	AT5G04930 | ALA1 , aminophospholipid ATPase 1	C4
FtPinG0006803400.01	108.109	111.485	100.105	72.3921	159.15	164.665	192.947	272.996	209.882	86.469	114.436	139.692	XP_021291448.1|protein PROTON GRADIENT REGULATION 5, chloroplastic [Herrania umbratica]	AT2G05620 | PGR5 , proton gradient regulation 5	C4
FtPinG0008511100.01	107.09	101.35	77.0808	231.253	128.27	106.888	178.105	220.538	225.863	148.101	177.905	136.366	XP_023912169.1|uncharacterized protein LOC112023780 [Quercus suber]	AT4G17670 | Protein of unknown function (DUF581)	C4
FtPinG0007802500.01	106.07	102.364	101.106	185.002	156.775	112.666	259.241	240.879	212.013	212.493	172.135	151.888	XP_021768179.1|uncharacterized protein LOC110732535 [Chenopodium quinoa]	AT3G02890 | RING/FYVE/PHD zinc finger superfamily protein	C4
FtPinG0009327700.01	106.07	172.295	100.105	83.452	88.6806	132.888	223.62	282.632	378.214	192.255	133.669	88.6935	XP_025689892.1|probable cinnamyl alcohol dehydrogenase 1 [Arachis hypogaea]	AT1G72680 | ATCAD1, CAD1 , cinnamyl-alcohol dehydrogenase	C4
FtPinG0006178700.01	103.01	110.472	96.1007	141.768	117.977	143.48	136.547	287.984	269.544	95.6678	125.014	143.018	XP_021858446.1|receptor-like cytosolic serine/threonine-protein kinase RBK2 [Spinacia oleracea]	AT5G35960 | Protein kinase family protein	C4
FtPinG0002440100.01	99.9502	87.1611	63.0661	77.4194	94.2231	93.4066	274.083	441.077	232.256	160.979	146.17	218.408	XP_021721026.1|ferric reduction oxidase 7, chloroplastic-like [Chenopodium quinoa]	AT5G49740 | ATFRO7, FRO7 , ferric reduction oxidase 7	C4
FtPinG0007577600.01	98.9303	135.809	93.0975	126.686	133.813	126.147	243.41	269.785	310.029	213.413	159.633	126.388	GAY54073.1|hypothetical protein CUMW_153860 [Citrus unshiu]	AT3G22910 | ATPase E1-E2 type family protein / haloacid dehalogenase-like hydrolase family protein	C4
FtPinG0001233200.01	98.9303	64.8641	16.0168	156.85	74.4284	78.9623	364.125	332.949	363.299	179.377	187.521	135.258	XP_016194527.1|allene oxide cyclase, chloroplastic [Arachis ipaensis]	AT1G13280 | AOC4 , allene oxide cyclase 4	C4
FtPinG0009408900.01	94.8507	115.539	121.127	163.888	240.705	195.48	273.094	418.595	373.953	170.178	167.327	276.059	CBI24963.3|unnamed protein product, partial [Vitis vinifera]	AT3G63490 | Ribosomal protein L1p/L10e family	C4
FtPinG0002328400.01	93.8308	146.958	63.0661	125.681	118.769	181.036	329.494	342.584	273.806	342.196	227.91	169.626	XP_021769122.1|probable leucine-rich repeat receptor-like protein kinase At5g49770 [Chenopodium quinoa]	AT1G79620 | Leucine-rich repeat protein kinase family protein	C4
FtPinG0000877700.01	88.7313	114.526	77.0808	70.3812	81.5545	137.703	149.41	241.95	239.713	255.727	111.551	115.302	PSS17653.1|Myb family transcription factor [Actinidia chinensis var. chinensis]	AT2G38300 | myb-like HTH transcriptional regulator family protein	C4
FtPinG0005792400.01	84.6517	163.174	65.0682	75.4085	87.8888	137.703	236.483	216.256	373.953	196.855	119.244	118.628	XP_010679295.1|PREDICTED: uncharacterized protein LOC104894701 [Beta vulgaris subsp. vulgaris]	AT1G21390 | emb2170 , embryo defective 2170	C4
FtPinG0008408600.01	82.6119	147.971	112.117	52.2832	101.349	163.702	207.789	222.679	355.841	207.893	74.0468	87.5848	PSS10142.1|UDP-glucuronate:xylan alpha-glucuronosyltransferase [Actinidia chinensis var. chinensis]	AT1G08990 | PGSIP5 , plant glycogenin-like starch initiation protein 5	C4
FtPinG0003524600.01	80.5721	82.0936	86.0902	96.5228	100.557	118.443	248.357	167.01	221.602	124.184	127.899	120.845	XP_021607857.1|protein tesmin/TSO1-like CXC 5 [Manihot esculenta]	AT4G29000 | Tesmin/TSO1-like CXC domain-containing protein	C4
FtPinG0001723800.01	77.5124	151.012	63.0661	26.1416	69.6776	134.814	144.463	277.279	383.541	263.086	194.253	96.4542	XP_021300535.1|non-specific lipid-transfer protein-like protein At2g13820 [Herrania umbratica]	AT2G48130 | Bifunctional inhibitor/lipid-transfer protein/seed storage 2S albumin superfamily protein	C4
FtPinG0001713200.01	75.4726	118.58	59.0619	91.4956	113.226	159.851	189.978	247.303	302.572	114.065	90.3948	90.9109	XP_021716202.1|actin-depolymerizing factor 2-like [Chenopodium quinoa]	AT3G46000 | ADF2 , actin depolymerizing factor 2	C4
FtPinG0002211200.01	75.4726	116.553	49.0514	38.207	45.1321	95.3326	133.578	173.433	245.04	87.3888	100.011	69.8461	PSS10153.1|E3 ubiquitin-protein like [Actinidia chinensis var. chinensis]	AT3G05200 | ATL6 , RING/U-box superfamily protein	C4
FtPinG0005008700.01	73.4328	155.066	124.13	127.692	125.895	157.925	507.598	516.017	591.293	239.169	367.349	223.951	BAS70761.1|Os01g0184050, partial [Oryza sativa Japonica Group]	-	C4
FtPinG0004210000.01	73.4328	71.9586	81.0849	132.719	117.977	97.2585	124.673	215.185	128.913	117.745	137.516	95.3455	XP_018831364.1|PREDICTED: RING-H2 finger protein ATL33 [Juglans regia]	AT5G47610 | RING/U-box superfamily protein	C4
FtPinG0009211600.01	70.3731	72.9721	70.0734	121.659	140.147	99.1844	411.62	448.571	623.255	277.805	468.322	343.687	BAF11577.1|Os03g0267100 [Oryza sativa Japonica Group]	-	C4
FtPinG0004484200.01	69.3532	64.8641	73.0766	141.768	87.8888	77.9994	173.157	204.48	113.997	97.5075	88.4715	126.388	KMT10086.1|hypothetical protein BVRB_5g118490 [Beta vulgaris subsp. vulgaris]	AT3G25410 | Sodium Bile acid symporter family	C4
FtPinG0008980800.01	69.3532	50.675	71.0745	138.752	117.185	87.6289	182.063	240.879	311.095	91.0684	192.329	164.083	XP_010033067.1|PREDICTED: 18.1 kDa class I heat shock protein [Eucalyptus grandis]	AT1G53540 | HSP20-like chaperones superfamily protein	C4
FtPinG0007142300.01	69.3532	183.444	56.0587	60.3268	88.6806	217.628	521.451	454.994	1081.37	321.039	206.754	186.256	XP_021282604.1|uncharacterized protein LOC110415313 [Herrania umbratica]	AT3G05550 | Hypoxia-responsive family protein	C4
FtPinG0009084900.01	68.3333	131.755	72.0755	41.2233	48.2993	158.888	174.147	266.573	345.187	218.012	225.025	67.6288	VDD40858.1|unnamed protein product [Brassica oleracea]	-	C4
FtPinG0005020300.01	66.2935	121.62	85.0891	108.588	110.059	103.036	776.734	587.745	988.684	256.647	303.881	202.886	XP_022854816.1|multiprotein-bridging factor 1c [Olea europaea var. sylvestris]	AT3G24500 | MBF1C, ATMBF1C , multiprotein bridging factor 1C	C4
FtPinG0005655100.01	63.2338	109.458	47.0493	150.817	188.446	155.036	912.292	1063.08	1123.99	917.123	623.147	594.247	XP_021601480.1|putative 12-oxophytodienoate reductase 11 [Manihot esculenta]	AT1G76690 | OPR2, ATOPR2 , 12-oxophytodienoate reductase 2	C4
FtPinG0007433300.01	63.2338	68.9181	46.0482	120.654	76.8037	71.2587	92.0207	126.328	150.22	122.344	95.2031	103.106	XP_021861604.1|protein STRICTOSIDINE SYNTHASE-LIKE 10-like [Spinacia oleracea]	AT3G57030 | Calcium-dependent phosphotriesterase superfamily protein	C4
FtPinG0002105200.01	62.2139	40.54	25.0262	42.2287	48.2993	77.9994	65.305	143.457	258.89	125.104	44.2358	23.282	OMO49992.1|Wound-induced protein, Wun1 [Corchorus capsularis]	AT3G10985 | SAG20, WI12, ATWI-12 , senescence associated gene 20	C4
FtPinG0006102000.01	60.1741	97.2961	62.065	66.3595	37.2142	113.629	116.757	202.339	273.806	147.181	73.0852	88.6935	XP_002266077.1|PREDICTED: protein LURP-one-related 8 [Vitis vinifera]	AT2G38640 | Protein of unknown function (DUF567)	C4
FtPinG0006155500.01	60.1741	71.9586	23.0241	71.3867	30.8799	78.9623	281.999	228.032	433.615	137.982	83.6633	106.432	XP_020554288.1|probable calcium-binding protein CML31 [Sesamum indicum]	AT3G01830 | Calcium-binding EF-hand family protein	C4
FtPinG0001499300.01	59.1542	73.9856	25.0262	2.01089	53.8418	97.2585	233.515	284.773	468.773	209.733	124.052	146.344	KMT06194.1|hypothetical protein BVRB_7g162650 [Beta vulgaris subsp. vulgaris]	AT4G20260 | PCAP1 , plasma-membrane associated cation-binding protein 1	C4
FtPinG0000372500.01	58.1343	78.0396	59.0619	183.997	166.276	112.666	312.673	388.618	511.389	252.048	154.825	168.518	XP_021767476.1|protein SULFUR DEFICIENCY-INDUCED 1-like [Chenopodium quinoa]	AT5G48850 | ATSDI1 , Tetratricopeptide repeat (TPR)-like superfamily protein	C4
FtPinG0001754800.01	57.1144	92.2286	64.0671	51.2778	57.8008	97.2585	205.81	149.88	154.482	156.38	65.392	64.3028	BAF63397.1|multidrug resistance-associated protein [Fagopyrum esculentum]	AT3G13080 | ATMRP3, MRP3, ABCC3 , multidrug resistance-associated protein 3	C4
FtPinG0001424600.01	57.1144	100.337	57.0598	40.2179	49.091	115.555	352.251	367.207	533.762	401.989	179.828	141.91	XP_023906838.1|cytochrome b561 and DOMON domain-containing protein At5g47530-like [Quercus suber]	AT5G47530 | Auxin-responsive family protein	C4
FtPinG0001342700.01	56.0945	146.958	42.044	35.1906	26.9209	100.147	191.957	211.974	282.329	177.537	73.0852	53.2161	OWM84715.1|hypothetical protein CDL15_Pgr027502 [Punica granatum]	AT5G15640 | Mitochondrial substrate carrier family protein	C4
FtPinG0006675100.01	52.0149	42.567	26.0273	103.561	55.4254	32.7405	95.9786	113.481	100.147	69.9111	111.551	76.4982	XP_010251254.1|PREDICTED: uncharacterized protein LOC104593196 [Nelumbo nucifera]	AT1G23710 | Protein of unknown function (DUF1645)	C4
FtPinG0004299200.01	48.9552	69.9316	65.0682	15.0817	25.3373	104.962	119.726	96.3517	173.659	83.7093	22.1179	28.8254	XP_021802805.1|basic blue protein-like [Prunus avium]	AT2G02850 | ARPN , plantacyanin	C4
FtPinG0004578400.01	48.9552	55.7425	45.0472	25.1362	53.8418	89.5548	110.821	92.0694	140.632	55.1929	23.0795	35.4774	XP_023906255.1|O-acyltransferase WSD1-like [Quercus suber]	AT3G49200 | O-acyltransferase (WSD1-like) family protein	C4
FtPinG0003503900.01	47.9353	147.971	39.0409	34.1852	30.8799	108.814	368.083	284.773	338.795	258.487	166.365	130.823	XP_010435318.1|PREDICTED: putative quinone-oxidoreductase homolog, chloroplastic [Camelina sativa]	AT4G13010 | Oxidoreductase, zinc-binding dehydrogenase family protein	C4
FtPinG0002445000.01	46.9154	97.2961	63.0661	40.2179	78.3873	140.591	210.757	256.938	278.068	156.38	58.6605	68.7375	XP_010067563.1|PREDICTED: protein trichome birefringence-like 33 [Eucalyptus grandis]	AT2G40320 | TBL33 , TRICHOME BIREFRINGENCE-LIKE 33	C4
FtPinG0004178300.01	46.9154	58.783	43.0451	19.1035	37.2142	124.221	147.431	83.5048	135.305	63.4719	20.1946	44.3468	XP_023922972.1|uncharacterized protein LOC112034388 [Quercus suber]	AT3G24750 | unknown protein; Has 25 Blast hits to 25 proteins in 12 species: Archae - 0; Bacteria - 8; Metazoa - 2; Fungi - 0; Plants - 15; Viruses - 0; Other Eukaryotes - 0 (source: NCBI BLink).	C4
FtPinG0005871600.01	45.8955	93.2421	48.0503	37.2015	81.5545	140.591	150.399	329.737	265.283	112.226	92.3181	75.3895	XP_021750266.1|germin-like protein subfamily 1 member 15 [Chenopodium quinoa]	AT5G39190 | GLP2A, ATGER2, GER2 , germin-like protein 2	C4
FtPinG0005819400.01	44.8756	55.7425	51.0535	97.5283	75.2202	59.7032	148.421	135.963	121.455	117.745	82.7017	53.2161	XP_010678782.1|PREDICTED: triose phosphate/phosphate translocator, non-green plastid, chloroplastic [Beta vulgaris subsp. vulgaris]	AT5G33320 | CUE1, PPT, ARAPPT , Glucose-6-phosphate/phosphate translocator-related	C4
FtPinG0000337800.01	44.8756	35.4725	49.0514	29.1579	57.009	51.9996	83.1155	169.151	132.109	68.0713	69.2386	74.2808	OMO87837.1|hypothetical protein CCACVL1_08732 [Corchorus capsularis]	AT1G72030 | Acyl-CoA N-acyltransferases (NAT) superfamily protein	C4
FtPinG0000328800.01	43.8557	81.0801	50.0524	44.2396	91.8478	135.777	243.41	293.337	615.797	170.178	105.781	127.497	XP_021846500.1|putative RING-H2 finger protein ATL21A [Spinacia oleracea]	AT2G46495 | RING/U-box superfamily protein	C4
FtPinG0003984200.01	43.8557	66.8911	36.0378	50.2723	77.5955	48.1478	652.061	420.736	701.028	137.062	250.028	126.388	XP_016206273.1|heat shock protein 82-like [Arachis ipaensis]	AT5G52640 | HSP81-1, ATHS83, HSP81.1, HSP83, ATHSP90.1, AtHsp90-1, HSP90.1 , heat shock protein 90.1	C4
FtPinG0002120400.01	43.8557	116.553	36.0378	18.098	52.2582	147.332	165.242	177.715	321.749	121.424	78.8551	50.9988	XP_010686956.1|PREDICTED: cysteine-rich receptor-like protein kinase 10 [Beta vulgaris subsp. vulgaris]	AT4G23180 | CRK10, RLK4 , cysteine-rich RLK (RECEPTOR-like protein kinase) 10	C4
FtPinG0005819000.01	42.8358	56.756	48.0503	67.3649	44.3403	81.8512	305.746	233.385	297.245	88.3087	59.6221	52.1074	PQQ16454.1|putative inactive poly [Prunus yedoensis var. nudiflora]	AT5G62520 | SRO5 , similar to RCD one 5	C4
FtPinG0005956000.01	42.8358	77.0261	48.0503	31.1688	43.5485	56.8144	91.0313	144.528	206.686	120.505	82.7017	75.3895	XP_007159667.1|hypothetical protein PHAVU_002G257100g [Phaseolus vulgaris]	AT4G39955 | alpha/beta-Hydrolases superfamily protein	C4
FtPinG0001148800.01	42.8358	59.7965	46.0482	55.2995	63.3433	48.1478	100.926	90.9988	105.474	49.6737	51.929	65.4115	XP_014507053.1|pectinesterase inhibitor 7 [Vigna radiata var. radiata]	AT1G14890 | Plant invertase/pectin methylesterase inhibitor superfamily protein	C4
FtPinG0006186500.01	41.8159	129.728	57.0598	87.4738	85.5134	115.555	160.294	196.986	436.811	276.885	325.037	150.779	XP_021632540.1|GDSL esterase/lipase At2g23540 [Manihot esculenta]	AT2G23540 | GDSL-like Lipase/Acylhydrolase superfamily protein	C4
FtPinG0005803200.01	41.8159	55.7425	26.0273	63.3431	34.047	42.37	165.242	137.034	263.152	88.3087	87.5099	56.5421	XP_022983951.1|trihelix transcription factor GT-3b-like [Cucurbita maxima]	AT5G01380 | Homeodomain-like superfamily protein	C4
FtPinG0006159600.01	40.796	122.634	42.044	16.0871	38.006	114.592	542.23	511.735	781.998	84.6292	83.6633	46.5641	XP_004309448.1|PREDICTED: uncharacterized protein LOC101299631 [Fragaria vesca subsp. vesca]	AT1G05060 | unknown protein; Has 34 Blast hits to 34 proteins in 13 species: Archae - 0; Bacteria - 0; Metazoa - 0; Fungi - 0; Plants - 34; Viruses - 0; Other Eukaryotes - 0 (source: NCBI BLink).	C4
FtPinG0002114500.01	40.796	58.783	31.0325	40.2179	54.6336	83.7771	233.515	247.303	388.868	172.938	87.5099	79.8242	XP_002308901.1|putative methyltransferase DDB_G0268948 [Populus trichocarpa]	AT2G41380 | S-adenosyl-L-methionine-dependent methyltransferases superfamily protein	C4
FtPinG0004471400.01	39.7761	45.6075	50.0524	76.4139	86.3052	60.6662	79.1576	116.693	113.997	75.4304	75.0085	93.1282	XP_021720064.1|uncharacterized protein LOC110687745 [Chenopodium quinoa]	AT3G07150 | unknown protein; Has 19 Blast hits to 19 proteins in 8 species: Archae - 0; Bacteria - 0; Metazoa - 0; Fungi - 0; Plants - 19; Viruses - 0; Other Eukaryotes - 0 (source: NCBI BLink).	C4
FtPinG0002586800.01	39.7761	24.324	39.0409	50.2723	51.4664	52.9625	85.0944	79.2225	63.9236	60.7122	73.0852	35.4774	XP_010668637.1|PREDICTED: probable trehalose-phosphate phosphatase C isoform X2 [Beta vulgaris subsp. vulgaris]	AT4G39770 | TPPH , Haloacid dehalogenase-like hydrolase (HAD) superfamily protein	C4
FtPinG0009397300.01	37.7363	100.337	44.0461	29.1579	81.5545	105.925	566.966	554.557	687.178	309.081	154.825	150.779	XP_021856501.1|probable carboxylesterase 8 isoform X1 [Spinacia oleracea]	AT2G45600 | alpha/beta-Hydrolases superfamily protein	C4
FtPinG0002913100.01	36.7164	73.9856	60.0629	158.861	111.643	93.4066	353.241	405.748	610.47	177.537	275.993	178.496	XP_010033067.1|PREDICTED: 18.1 kDa class I heat shock protein [Eucalyptus grandis]	AT1G53540 | HSP20-like chaperones superfamily protein	C4
FtPinG0004611200.01	35.6965	74.9991	43.0451	47.256	40.3813	103.999	180.084	186.28	300.441	143.502	102.896	107.541	XP_015898874.1|F-box/kelch-repeat protein At2g44130-like [Ziziphus jujuba]	AT2G44130 | Galactose oxidase/kelch repeat superfamily protein	C4
FtPinG0004076700.01	34.6766	37.4995	29.0304	30.1634	41.1731	50.0737	102.905	159.516	89.493	56.1128	65.392	63.1941	XP_012474863.1|PREDICTED: mitochondrial adenine nucleotide transporter ADNT1-like [Gossypium raimondii]	AT4G01100 | ADNT1 , adenine nucleotide transporter 1	C4
FtPinG0001559200.01	33.6567	22.297	39.0409	86.4684	26.9209	27.9257	93.9997	109.199	103.343	70.831	68.277	54.3248	XP_013677527.1|uncharacterized protein LOC106382110 isoform X3 [Brassica napus]	AT3G26380 | Melibiase family protein	C4
FtPinG0005846500.01	32.6368	86.1476	69.0724	66.3595	67.3022	91.4807	274.083	340.443	522.042	150.861	212.524	131.932	XP_010690292.1|PREDICTED: alpha-amylase [Beta vulgaris subsp. vulgaris]	AT4G25000 | ATAMY1, AMY1 , alpha-amylase-like	C4
FtPinG0008661100.01	32.6368	30.405	46.0482	26.1416	39.5896	53.9255	170.189	72.7991	91.6238	84.6292	55.7755	42.1294	CBI25396.3|unnamed protein product, partial [Vitis vinifera]	AT3G05550 | Hypoxia-responsive family protein	C4
FtPinG0003055900.01	32.6368	23.3105	35.0367	23.1253	36.4224	20.2221	69.2629	49.2464	56.4658	64.3918	68.277	68.7375	XP_002279273.2|PREDICTED: uncharacterized protein LOC100242317 [Vitis vinifera]	AT5G43120 | ARM-repeat/Tetratricopeptide repeat (TPR)-like protein	C4
FtPinG0002719800.01	32.6368	19.2565	15.0157	13.0708	27.7127	27.9257	50.463	63.1639	106.539	77.2701	71.1619	27.7167	KJB48402.1|hypothetical protein B456_008G067200 [Gossypium raimondii]	AT2G18250 | ATCOAD, COAD , 4-phosphopantetheine adenylyltransferase	C4
FtPinG0009489000.01	32.6368	93.2421	10.0105	50.2723	88.6806	145.406	138.526	178.786	163.005	119.585	101.935	108.65	OAY45104.1|hypothetical protein MANES_07G031500 [Manihot esculenta]	AT1G24430 | HXXXD-type acyl-transferase family protein	C4
FtPinG0005188400.01	31.6169	32.432	48.0503	49.2669	44.3403	45.2589	110.821	139.175	148.09	101.187	90.3948	72.0635	XP_012087219.1|probable serine/threonine-protein kinase DDB_G0278535 isoform X1 [Jatropha curcas]	AT4G23050 | PAS domain-containing protein tyrosine kinase family protein	C4
FtPinG0009436700.01	31.6169	33.4455	40.0419	58.3159	53.8418	45.2589	64.3156	99.5634	64.989	37.7152	90.3948	47.6728	XP_007200247.1|22.0 kDa class IV heat shock protein [Prunus persica]	AT4G10250 | ATHSP22.0 , HSP20-like chaperones superfamily protein	C4
FtPinG0002937700.01	30.597	83.1071	57.0598	34.1852	26.1291	52.9625	157.326	190.562	168.332	89.2286	62.5071	54.3248	XP_021721841.1|trehalose-phosphate phosphatase A-like [Chenopodium quinoa]	AT5G51460 | ATTPPA , Haloacid dehalogenase-like hydrolase (HAD) superfamily protein	C4
FtPinG0001102900.01	30.597	70.9451	48.0503	63.3431	118.769	206.072	296.841	368.278	463.446	264.926	75.0085	96.4542	XP_008355237.1|PREDICTED: peroxidase 60-like [Malus domestica]	AT5G17820 | Peroxidase superfamily protein	C4
FtPinG0008959700.01	30.597	36.486	32.0336	258.4	107.684	70.2957	193.936	265.502	370.757	137.982	211.562	98.6715	XP_010069876.1|PREDICTED: uncharacterized protein LOC104456721 [Eucalyptus grandis]	AT1G02700 | unknown protein; FUNCTIONS IN: molecular_function unknown; INVOLVED IN: biological_process unknown; LOCATED IN: mitochondrion; BEST Arabidopsis thaliana protein match is: unknown protein (TAIR:AT4G02140.1); Has 49 Blast hits to 49 proteins in 21 species: Archae - 0; Bacteria - 0; Metazoa - 10; Fungi - 6; Plants - 29; Viruses - 0; Other Eukaryotes - 4 (source: NCBI BLink).	C4
FtPinG0002733600.01	30.597	54.729	31.0325	32.1743	49.8828	71.2587	105.873	117.763	75.6429	92.9081	61.5454	35.4774	PSS31367.1|Protein DA1-related like [Actinidia chinensis var. chinensis]	AT1G19270 | DA1 , DA1	C4
FtPinG0002932100.01	30.597	57.7695	24.0252	56.305	111.643	83.7771	186.02	239.809	185.378	93.828	55.7755	117.519	XP_011100707.1|polygalacturonase At1g48100 [Sesamum indicum]	AT1G48100 | Pectin lyase-like superfamily protein	C4
FtPinG0007266400.01	28.5572	56.756	30.0315	8.04357	26.9209	54.8884	86.0839	82.4342	116.128	68.9912	34.6193	55.4334	XP_027070298.1|bZIP transcription factor TGA10-like isoform X2 [Coffea arabica]	AT5G06839 | TGA10, bZIP65 , bZIP transcription factor family protein	C4
FtPinG0006449500.01	28.5572	87.1611	9.00944	36.1961	51.4664	45.2589	906.355	555.628	531.631	358.754	310.612	200.669	XP_018848368.1|PREDICTED: L-lactate dehydrogenase A-like [Juglans regia]	AT4G17260 | Lactate/malate dehydrogenase family protein	C4
FtPinG0007057300.01	28.5572	52.702	9.00944	30.1634	40.3813	70.2957	430.42	431.441	410.176	308.161	197.138	93.1282	CBI29082.3|unnamed protein product, partial [Vitis vinifera]	AT5G04930 | ALA1 , aminophospholipid ATPase 1	C4
FtPinG0000165000.01	28.5572	59.7965	7.00734	5.02723	13.4604	25.0368	109.831	107.057	134.239	65.3117	20.1946	47.6728	PSR91241.1|COPII coat assembly protein [Actinidia chinensis var. chinensis]	-	C4
FtPinG0001488700.01	27.5373	62.837	5.00524	48.2614	49.091	38.5182	94.9891	130.61	159.809	91.9882	49.044	33.2601	BAP90373.1|UDP-glycose: glycosyltransferase UGT709H1 [Fagopyrum esculentum]	AT1G22400 | UGT85A1, ATUGT85A1 , UDP-Glycosyltransferase superfamily protein	C4
FtPinG0003444900.01	26.5174	56.756	36.0378	21.1144	34.047	76.0735	113.789	92.0694	177.921	57.9526	32.696	41.0208	XP_010685988.1|PREDICTED: peroxidase 57 [Beta vulgaris subsp. vulgaris]	AT5G17820 | Peroxidase superfamily protein	C4
FtPinG0001989600.01	25.4975	29.3915	22.0231	78.4248	39.5896	20.2221	72.2313	72.7991	59.662	47.8339	75.0085	48.7814	XP_010265336.1|PREDICTED: probable isoprenylcysteine alpha-carbonyl methylesterase ICMEL2 isoform X1 [Nelumbo nucifera]	AT1G26120 | ICME-LIKE1 , alpha/beta-Hydrolases superfamily protein	C4
FtPinG0007467100.01	24.4776	45.6075	23.0241	2.01089	22.1702	42.37	61.3472	76.0108	140.632	53.3532	11.5398	32.1514	PSS05076.1|ABC transporter B family member protein [Actinidia chinensis var. chinensis]	AT3G62150 | PGP21 , P-glycoprotein 21	C4
FtPinG0001153200.01	23.4577	15.2025	11.0115	7.03812	18.2112	11.5555	39.5788	39.6112	63.9236	24.8368	9.61647	26.6081	XP_008374870.1|PREDICTED: nudix hydrolase 18, mitochondrial [Malus domestica]	AT2G01670 | atnudt17, NUDT17 , nudix hydrolase homolog 17	C4
FtPinG0004510000.01	22.4378	25.3375	23.0241	20.1089	24.5455	27.9257	76.1892	66.3756	59.662	73.5906	72.1235	38.8034	XP_021761553.1|DNA annealing helicase and endonuclease ZRANB3-like [Chenopodium quinoa]	AT5G07810 | SNF2 domain-containing protein / helicase domain-containing protein / HNH endonuclease domain-containing protein	C4
FtPinG0000993400.01	22.4378	37.4995	10.0105	51.2778	31.6716	20.2221	65.305	67.4462	59.662	79.1099	45.1974	27.7167	XP_021776052.1|exocyst complex component SEC3A-like [Chenopodium quinoa]	AT1G47550 | SEC3A , exocyst complex component sec3A	C4
FtPinG0000920400.01	21.4179	7.09451	18.0189	2.01089	17.4194	19.2591	61.3472	68.5168	26.6348	45.0742	64.4304	53.2161	XP_027072731.1|benzyl alcohol O-benzoyltransferase-like [Coffea arabica]	AT5G17540 | HXXXD-type acyl-transferase family protein	C4
FtPinG0000510600.01	20.398	32.432	17.0178	71.3867	31.6716	20.2221	51.4525	79.2225	121.455	58.8725	87.5099	67.6288	XP_021748518.1|uncharacterized protein LOC110714323 isoform X2 [Chenopodium quinoa]	AT2G45380 | FUNCTIONS IN: molecular_function unknown; INVOLVED IN: biological_process unknown; LOCATED IN: cellular_component unknown; EXPRESSED IN: inflorescence meristem, flower, cultured cell; EXPRESSED DURING: petal differentiation and expansion stage; BEST Arabidopsis thaliana protein match is: Calcium-binding EF-hand family protein (TAIR:AT4G34070.1); Has 171 Blast hits to 170 proteins in 3…	C4
FtPinG0003769000.01	19.3781	60.81	22.0231	22.1198	29.2963	64.518	91.0313	85.6459	141.697	69.9111	44.2358	45.4554	ESR60851.1|hypothetical protein CICLE_v10016164mg [Citrus clementina]	AT4G15417 | ATRTL1, RTL1 , RNAse II-like 1	C4
FtPinG0001727900.01	19.3781	33.4455	16.0168	16.0871	15.8358	23.1109	82.126	62.0933	74.5775	21.1573	13.4631	17.7387	XP_019105332.1|PREDICTED: heat stress transcription factor A-2c [Beta vulgaris subsp. vulgaris]	AT3G22830 | AT-HSFA6B, HSFA6B , heat shock transcription factor A6B	C4
FtPinG0003153100.01	19.3781	32.432	12.0126	17.0926	30.8799	73.1846	139.515	160.586	190.705	110.386	68.277	43.2381	KDO51296.1|hypothetical protein CISIN_1g008306mg [Citrus sinensis]	AT3G48860 | unknown protein; INVOLVED IN: biological_process unknown; LOCATED IN: plasma membrane; EXPRESSED IN: 22 plant structures; EXPRESSED DURING: 13 growth stages; BEST Arabidopsis thaliana protein match is: unknown protein (TAIR:AT5G23700.1); Has 12429 Blast hits to 9751 proteins in 897 species: Archae - 180; Bacteria - 1190; Metazoa - 6552; Fungi - 1361; Plants - 886; Viruses - 50; Other …	C4
FtPinG0008630300.01	18.3582	65.8776	36.0378	22.1198	40.3813	60.6662	302.778	356.501	408.045	237.33	136.554	85.3675	XP_021768213.1|transcription factor MYB39-like [Chenopodium quinoa]	-	C4
FtPinG0005912200.01	18.3582	10.135	28.0294	20.1089	30.8799	37.5552	77.1787	95.2811	133.174	64.3918	22.1179	32.1514	XP_011082099.1|uncharacterized protein LOC105164948 [Sesamum indicum]	AT4G31330 | Protein of unknown function, DUF599	C4
FtPinG0009333800.01	18.3582	40.54	26.0273	30.1634	40.3813	58.7403	169.199	173.433	188.575	121.424	100.973	105.324	XP_021733828.1|berberine bridge enzyme-like 15 [Chenopodium quinoa]	AT2G34790 | MEE23, EDA28 , FAD-binding Berberine family protein	C4
FtPinG0001189900.01	18.3582	71.9586	17.0178	51.2778	36.4224	43.333	113.789	138.104	173.659	51.5134	67.3153	46.5641	OMO80876.1|hypothetical protein COLO4_23878 [Corchorus olitorius]	AT3G60780 | Protein of unknown function (DUF1442)	C4
FtPinG0005329400.01	18.3582	24.324	14.0147	7.03812	23.7537	33.7034	56.3998	38.5407	66.0544	38.6351	12.5014	17.7387	PHU16244.1|LOB domain-containing protein 15 [Capsicum chinense]	AT2G30340 | LBD13 , LOB domain-containing protein 13	C4
FtPinG0003616200.01	18.3582	41.5535	9.00944	22.1198	31.6716	37.5552	94.9891	83.5048	58.5966	86.469	63.4687	33.2601	XP_010691118.1|PREDICTED: probable leucine-rich repeat receptor-like protein kinase At1g35710 isoform X2 [Beta vulgaris subsp. vulgaris]	AT1G74170 | AtRLP13, RLP13 , receptor like protein 13	C4
FtPinG0001635300.01	17.3383	66.8911	4.00419	20.1089	58.5925	51.9996	154.357	181.998	295.114	172.938	94.2414	97.5629	XP_016542682.1|PREDICTED: vesicle-associated membrane protein 724 [Capsicum annuum]	AT4G15780 | ATVAMP724, VAMP724 , vesicle-associated membrane protein 724	C4
FtPinG0000224600.01	17.3383	30.405	3.00315	28.1525	10.2933	25.9998	69.2629	65.305	83.1006	34.0357	23.0795	13.304	-	-	C4
FtPinG0004749000.01	16.3184	76.0126	52.0545	28.1525	110.059	87.6289	166.231	199.127	357.972	41.3947	64.4304	495.575	XP_019234293.1|PREDICTED: polygalacturonase inhibitor-like [Nicotiana attenuata]	AT5G06860 | PGIP1, ATPGIP1 , polygalacturonase inhibiting protein 1	C4
FtPinG0003177100.01	16.3184	45.6075	18.0189	31.1688	53.8418	64.518	136.547	142.386	214.144	60.7122	38.4659	21.0647	OMO62032.1|HAD-superfamily hydrolase, subfamily IA, variant 3 [Corchorus capsularis]	AT5G59480 | Haloacid dehalogenase-like hydrolase (HAD) superfamily protein	C4
FtPinG0005009000.01	16.3184	57.7695	15.0157	31.1688	30.8799	19.2591	391.83	272.996	485.819	67.1514	95.2031	74.2808	PSS19336.1|HSP20-like chaperone protein [Actinidia chinensis var. chinensis]	AT5G12020 | HSP17.6II , 17.6 kDa class II heat shock protein	C4
FtPinG0001622600.01	15.2985	11.1485	20.021	15.0817	24.5455	33.7034	55.4103	47.1053	29.831	17.4778	19.2329	28.8254	XP_021900487.1|auxin-induced protein 15A-like [Carica papaya]	AT2G21210 | SAUR-like auxin-responsive protein family	C4
FtPinG0000575600.01	14.2786	14.189	6.00629	2.01089	7.12612	13.4814	43.5367	51.3876	30.8964	19.3175	11.5398	7.76068	AXY96231.1|aromatic amino acid aminotransferase 2 [Camellia sinensis]	AT5G53970 | Tyrosine transaminase family protein	C4
FtPinG0004178900.01	13.2587	19.2565	26.0273	19.1035	38.7978	29.8516	61.3472	52.4581	56.4658	22.9971	30.7727	42.1294	XP_021767476.1|protein SULFUR DEFICIENCY-INDUCED 1-like [Chenopodium quinoa]	AT5G48850 | ATSDI1 , Tetratricopeptide repeat (TPR)-like superfamily protein	C4
FtPinG0007832400.01	13.2587	67.9046	16.0168	48.2614	49.091	39.4812	83.1155	177.715	266.348	158.22	168.288	79.8242	XP_003632312.1|PREDICTED: non-specific lipid-transfer protein-like protein At2g13820 [Vitis vinifera]	AT3G22600 | Bifunctional inhibitor/lipid-transfer protein/seed storage 2S albumin superfamily protein	C4
FtPinG0002006400.01	13.2587	10.135	15.0157	12.0654	26.1291	21.185	31.663	34.2584	70.3159	22.0772	19.2329	15.5214	XP_022857149.1|uncharacterized protein LOC111378212 [Olea europaea var. sylvestris]	AT5G39380 | Plant calmodulin-binding protein-related	C4
FtPinG0007153400.01	12.2388	14.189	6.00629	77.4194	17.4194	15.4073	53.4314	87.7871	56.4658	42.3146	69.2386	41.0208	AYC12247.1|testa 12-like protein [Fagopyrum esculentum subsp. esculentum]	AT5G65380 | MATE efflux family protein	C4
FtPinG0004985900.01	12.2388	42.567	5.00524	16.0871	31.6716	31.7775	55.4103	125.257	88.4276	69.9111	34.6193	68.7375	XP_021751301.1|plant intracellular Ras-group-related LRR protein 6-like [Chenopodium quinoa]	AT2G19330 | PIRL6 , plant intracellular ras group-related LRR 6	C4
FtPinG0006052500.01	11.2189	76.0126	15.0157	19.1035	14.2522	20.2221	470.988	417.524	592.358	204.214	100.011	73.1722	XP_017974066.1|PREDICTED: probable inactive poly [ADP-ribose] polymerase SRO5 isoform X1 [Theobroma cacao]	AT5G62520 | SRO5 , similar to RCD one 5	C4
FtPinG0008173000.01	11.2189	7.09451	2.0021	6.03268	11.8769	7.70364	28.6946	26.7644	55.4004	22.0772	19.2329	18.8474	XP_012068763.1|uncharacterized protein OsI_027940-like isoform X1 [Jatropha curcas]	AT3G03773 | HSP20-like chaperones superfamily protein	C4
FtPinG0007438100.01	10.199	39.5265	11.0115	5.02723	15.8358	42.37	51.4525	84.5754	99.0815	39.5549	22.1179	9.97802	XP_021733033.1|NDR1/HIN1-like protein 13 [Chenopodium quinoa]	AT5G22870 | Late embryogenesis abundant (LEA) hydroxyproline-rich glycoprotein family	C4
FtPinG0006961400.01	10.199	18.243	11.0115	2.01089	19.003	14.4443	44.5262	57.811	72.4467	29.4362	12.5014	12.1954	XP_021726739.1|DUF21 domain-containing protein At5g52790-like isoform X1 [Chenopodium quinoa]	AT5G52790 | CBS domain-containing protein with a domain of unknown function (DUF21)	C4
FtPinG0000225700.01	10.199	7.09451	1.00105	10.0545	6.33433	10.5925	39.5788	38.5407	43.6811	44.1544	23.0795	25.4994	PSR91241.1|COPII coat assembly protein [Actinidia chinensis var. chinensis]	-	C4
FtPinG0002141200.01	9.1791	11.1485	11.0115	28.1525	26.1291	9.62955	67.284	88.8577	141.697	50.5935	72.1235	23.282	PON90588.1|LOW QUALITY PROTEIN: hypothetical protein TorRG33x02_136430 [Trema orientale]	-	C4
FtPinG0001574200.01	9.1791	26.351	10.0105	47.256	76.8037	239.776	548.167	617.721	703.159	209.733	110.589	86.4762	XP_019195299.1|PREDICTED: germin-like protein subfamily 1 member 13 [Ipomoea nil]	AT5G39150 | RmlC-like cupins superfamily protein	C4
FtPinG0009210700.01	9.1791	12.162	6.00629	23.1253	12.6687	15.4073	59.3682	43.8935	85.2314	15.638	63.4687	22.1734	ADU55794.1|HSP18.1B [Citrullus lanatus]	AT1G53540 | HSP20-like chaperones superfamily protein	C4
FtPinG0007057100.01	9.1791	14.189	1.00105	14.0762	11.0851	18.2961	120.715	101.705	44.7465	84.6292	36.5426	13.304	XP_021759697.1|phospholipid-transporting ATPase 1-like [Chenopodium quinoa]	AT5G04930 | ALA1 , aminophospholipid ATPase 1	C4
FtPinG0001659800.01	8.1592	11.1485	17.0178	1.00545	5.54254	39.4812	39.5788	40.6818	37.2887	11.0386	6.73153	6.65201	XP_002268667.1|PREDICTED: flavonol 3-sulfotransferase [Vitis vinifera]	AT1G74100 | SOT16, ATSOT16, CORI-7, ATST5A , sulfotransferase 16	C4
FtPinG0004354800.01	8.1592	6.081	15.0157	8.04357	7.12612	20.2221	44.5262	27.8349	33.0272	22.0772	11.5398	13.304	RDX92795.1|Heat stress transcription factor B-4 [Mucuna pruriens]	AT1G46264 | AT-HSFB4, HSFB4, SCZ , heat shock transcription factor B4	C4
FtPinG0008358700.01	8.1592	8.10801	14.0147	0	11.8769	28.8887	52.4419	34.2584	66.0544	13.7982	7.69318	12.1954	OMO75640.1|Knottin [Corchorus olitorius]	AT2G02147 | LCR73 , low-molecular-weight cysteine-rich 73	C4
FtPinG0007366400.01	8.1592	31.4185	11.0115	2.01089	22.9619	22.148	27.7052	125.257	63.9236	56.1128	5.76988	2.21734	KGO77890.1|Fps/Fes/Fer/CIP4 homology [Penicillium italicum]	-	C4
FtPinG0005871200.01	8.1592	18.243	3.00315	13.0708	25.3373	49.1107	174.147	161.657	235.452	28.5164	25.0028	15.5214	XP_021750266.1|germin-like protein subfamily 1 member 15 [Chenopodium quinoa]	AT5G39190 | GLP2A, ATGER2, GER2 , germin-like protein 2	C4
FtPinG0007882300.01	8.1592	4.054	3.00315	6.03268	30.0881	6.74069	18.7999	7.49402	119.324	5.51929	94.2414	19.956	XP_010693742.1|PREDICTED: oleosin 1 [Beta vulgaris subsp. vulgaris]	AT4G25140 | OLEO1, OLE1 , oleosin 1	C4
FtPinG0007365800.01	8.1592	10.135	1.00105	5.02723	3.95896	14.4443	24.7368	33.1878	54.335	64.3918	16.348	19.956	XP_013070396.1|PREDICTED: adhesive plaque matrix protein-like isoform X2 [Biomphalaria glabrata]	-	C4
FtPinG0002149300.01	7.1393	40.54	15.0157	25.1362	26.1291	66.4439	108.842	98.4928	108.67	62.552	40.3892	38.8034	XP_023900121.1|elongation of fatty acids protein 3-like [Quercus suber]	AT4G36830 | HOS3-1 , GNS1/SUR4 membrane protein family	C4
FtPinG0002238800.01	7.1393	13.1755	14.0147	40.2179	22.9619	20.2221	133.578	105.987	171.528	52.4333	52.8906	67.6288	XP_008225981.1|PREDICTED: 17.6 kDa class I heat shock protein-like [Prunus mume]	AT1G07400 | HSP20-like chaperones superfamily protein	C4
FtPinG0003590100.01	7.1393	16.216	7.00734	10.0545	18.2112	19.2591	71.2419	40.6818	15.9809	47.8339	21.1562	9.97802	OWM82205.1|hypothetical protein CDL15_Pgr001779 [Punica granatum]	AT5G65140 | TPPJ , Haloacid dehalogenase-like hydrolase (HAD) superfamily protein	C4
FtPinG0004646400.01	7.1393	10.135	6.00629	9.04902	8.7097	21.185	23.7473	26.7644	33.0272	25.7567	13.4631	16.63	XP_012465395.1|PREDICTED: E3 ubiquitin-protein ligase ATL6-like [Gossypium raimondii]	AT1G72200 | RING/U-box superfamily protein	C4
FtPinG0003455500.01	5.0995	4.054	11.0115	0	7.91791	4.81478	65.305	66.3756	52.2042	30.3561	32.696	12.1954	ABG75942.1|coniferyl alcohol acyltransferase [Petunia x hybrida]	AT1G78990 | HXXXD-type acyl-transferase family protein	C4
FtPinG0004593100.01	5.0995	11.1485	7.00734	8.04357	12.6687	13.4814	38.5893	35.329	42.6157	20.2374	3.84659	12.1954	CBI15440.3|unnamed protein product, partial [Vitis vinifera]	AT3G18440 | AtALMT9, ALMT9 , aluminum-activated malate transporter 9	C4
FtPinG0002970500.01	5.0995	15.2025	5.00524	18.098	11.0851	24.0739	23.7473	49.2464	29.831	34.9555	13.4631	13.304	XP_022883262.1|peroxidase 5-like [Olea europaea var. sylvestris]	AT4G11290 | Peroxidase superfamily protein	C4
FtPinG0003201200.01	5.0995	14.189	2.0021	0	3.95896	8.6666	31.663	26.7644	34.0926	13.7982	3.84659	12.1954	KMT16318.1|hypothetical protein BVRB_3g054660 [Beta vulgaris subsp. vulgaris]	AT3G06520 | agenet domain-containing protein	C4
FtPinG0002095500.01	3.0597	14.189	10.0105	4.02179	16.6276	29.8516	113.789	158.445	167.267	69.9111	47.1207	31.0427	AUS89428.1|sulfate transporter [Sesuvium portulacastrum]	AT4G08620 | SULTR1;1 , sulphate transporter 1;1	C4
FtPinG0007618600.01	3.0597	3.0405	6.00629	12.0654	15.8358	5.77773	25.7262	11.7763	33.0272	21.1573	8.65483	14.4127	XP_010676824.1|PREDICTED: dehydration-responsive element-binding protein 2E [Beta vulgaris subsp. vulgaris]	AT2G40340 | DREB2C, AtERF48 , Integrase-type DNA-binding superfamily protein	C4
FtPinG0003200400.01	3.0597	3.0405	3.00315	10.0545	6.33433	4.81478	22.7578	29.9761	21.3079	22.0772	19.2329	7.76068	XP_021864350.1|uncharacterized protein LOC110803176 [Spinacia oleracea]	AT2G34320 | Polynucleotidyl transferase, ribonuclease H-like superfamily protein	C4
FtPinG0002117000.01	3.0597	12.162	3.00315	8.04357	6.33433	13.4814	62.3366	63.1639	35.158	35.8754	34.6193	21.0647	XP_012830006.1|PREDICTED: probable leucine-rich repeat receptor-like protein kinase IMK3 [Erythranthe guttata]	AT3G56100 | MRLK, IMK3 , meristematic receptor-like kinase	C4
FtPinG0002549200.01	2.0398	13.1755	8.00839	0	68.8858	0.962955	159.305	8.56459	14.9155	104.867	19.2329	23.282	XP_022846721.1|fructose-bisphosphate aldolase 6, cytosolic [Olea europaea var. sylvestris]	AT3G52930 | Aldolase superfamily protein	C4
FtPinG0001106300.01	1.0199	2.027	3.00315	5.02723	4.75075	2.88887	129.621	42.823	73.5121	32.1959	25.9645	34.3687	ARA90566.1|phenylpropene reductase 2 [Malus domestica]	AT4G39230 | NmrA-like negative transcriptional regulator family protein	C4
FtPinG0007446600.01	1.0199	4.054	1.00105	2.01089	22.1702	0	0.98947	7.49402	34.0926	1.83976	66.3537	12.1954	AFR59201.1|1-Cys peroxiredoxin [Fagopyrum tataricum]	AT1G48130 | ATPER1, PER1 , 1-cysteine peroxiredoxin 1	C4
FtPinG0009199400.01	0	3.0405	3.00315	0	5.54254	11.5555	10.8842	14.988	22.3732	8.27894	3.84659	2.21734	XP_021728618.1|germin-like protein [Chenopodium quinoa]	AT5G39120 | RmlC-like cupins superfamily protein	C4
FtPinG0001894200.01	0	0	2.0021	2.01089	0.791791	4.81478	89.0523	95.2811	116.128	50.5935	38.4659	44.3468	XP_010673286.1|PREDICTED: probable aldo-keto reductase 2 [Beta vulgaris subsp. vulgaris]	AT1G60710 | ATB2 , NAD(P)-linked oxidoreductase superfamily protein	C4
FtPinG0001100200.01	0	0	1.00105	8.04357	3.16716	0	4.94735	6.42345	19.1771	0.919882	31.7344	2.21734	PSS21334.1|Reticulon-like protein [Actinidia chinensis var. chinensis]	AT2G23640 | RTNLB13 , Reticulan like protein B13	C4
FtPinG0006674500.01	0	1.0135	1.00105	2.01089	0	0	11.8736	10.7057	17.0463	4.59941	11.5398	3.32601	XP_021895103.1|probable inactive poly [ADP-ribose] polymerase SRO5 [Carica papaya]	AT1G23550 | SRO2 , similar to RCD one 2	C4
FtPinG0005846700.01	0	0	1.00105	1.00545	0	0.962955	19.7894	19.2703	21.3079	23.9169	17.3097	11.0867	XP_021842973.1|uncharacterized protein LOC110782990 [Spinacia oleracea]	AT1G09157 | Protein of unknown function (DUF679)	C4
FtPinG0009500300.01	2955.67	1814.17	2286.4	12863.7	5716.73	3901.89	4905.79	7864.44	5742.47	4358.4	3843.7	5145.33	-	-	C5
FtPinG0007588800.01	2717.01	2284.43	2552.67	15929.3	9119.85	4584.63	4616.87	7904.05	7218.04	3308.82	4603.41	4102.08	XP_009343398.1|PREDICTED: beta-amylase 1, chloroplastic-like [Pyrus x bretschneideri]	AT3G23920 | BAM1, BMY7, TR-BAMY , beta-amylase 1	C5
FtPinG0008314400.01	2364.13	2910.77	2886.02	7347.8	4737.29	4461.37	2989.19	7075.43	7037.98	3487.27	3121.51	3643.09	XP_021746619.1|REF/SRPP-like protein At1g67360 [Chenopodium quinoa]	AT1G67360 | Rubber elongation factor protein (REF)	C5
FtPinG0002120600.01	2084.68	1625.66	2272.38	15171.2	6800.69	2273.54	2952.58	4278.01	5857.53	4056.68	4998.64	3381.44	AGZ20206.1|abscisic acid stress ripening-related protein [Suaeda liaotungensis]	-	C5
FtPinG0002721300.01	1731.79	1222.28	2264.37	6437.87	4179.07	3616.86	2791.3	5338.95	3506.21	2645.58	2668.57	2922.45	ACN78662.1|endo-beta-mannanase [Actinidia arguta]	AT5G66460 | MAN7, AtMAN7 , Glycosyl hydrolase superfamily protein	C5
FtPinG0001405800.01	1531.89	1959.1	1733.82	8059.66	3430.83	2633.68	1729.59	3329.49	5260.91	2761.49	3020.53	2584.31	AEA29617.1|dehydrin [Suaeda glauca]	AT1G20440 | COR47, RD17, AtCOR47 , cold-regulated 47	C5
FtPinG0009574600.01	1361.57	1021.61	1053.1	5576.2	3095.11	1784.36	2115.49	3456.88	3340.01	1883	1971.38	1563.22	PQQ10639.1|protein phosphatase 2C 56 [Prunus yedoensis var. nudiflora]	AT4G26080 | ABI1, AtABI1 , Protein phosphatase 2C family protein	C5
FtPinG0002889200.01	1290.17	835.125	1095.15	5892.92	3529.01	1787.24	2242.14	3521.12	2804.11	1842.52	2078.12	1934.63	XP_022746340.1|protein phosphatase 2C 37-like [Durio zibethinus]	AT2G29380 | HAI3 , highly ABA-induced PP2C gene 3	C5
FtPinG0008126900.01	991.343	841.206	1118.17	2809.22	3620.86	1780.5	2839.78	2626.12	1623.66	1604.28	1827.13	1482.29	XP_002299478.3|endoglucanase 6 [Populus trichocarpa]	AT1G64390 | AtGH9C2, GH9C2 , glycosyl hydrolase 9C2	C5
FtPinG0006158900.01	943.408	828.03	1119.17	3857.9	2418.92	2194.57	1966.08	3128.22	1992.28	1833.33	1857.9	1768.33	XP_002274227.2|PREDICTED: protein NRT1/ PTR FAMILY 6.4 [Vitis vinifera]	AT3G21670 | Major facilitator superfamily protein	C5
FtPinG0006448300.01	858.756	1450.32	780.818	1222.62	1365.05	1708.28	1805.78	2059.78	3784.28	1416.62	932.798	1068.76	RQW15002.1|hypothetical protein EHS17_16060, partial [Rhodobacteraceae bacterium CH30]	AT4G05050 | UBQ11 , ubiquitin 11	C5
FtPinG0002308200.01	848.557	518.912	767.804	3262.67	3649.37	1134.36	2851.65	2918.39	2808.38	1134.22	1478.05	1410.23	NP_001267894.1|CBL-interacting protein kinase 16 [Vitis vinifera]	AT5G45820 | CIPK20, SnRK3.6, PKS18 , CBL-interacting protein kinase 20	C5
FtPinG0002578700.01	839.378	655.735	792.831	2898.7	1837.75	1009.18	1198.25	1573.74	1435.08	731.307	934.721	755.004	XP_021760367.1|common plant regulatory factor 1-like [Chenopodium quinoa]	AT2G46270 | GBF3 , G-box binding factor 3	C5
FtPinG0006204600.01	825.099	1298.29	872.914	3472.81	2662	2747.31	4742.53	5049.9	6644.85	3033.77	2108.89	1983.41	XP_003632943.1|PREDICTED: 5'-adenylylsulfate reductase 3, chloroplastic [Vitis vinifera]	AT4G04610 | APR1, APR, PRH19, ATAPR1 , APS reductase 1	C5
FtPinG0002920400.01	767.985	1045.93	872.914	3451.7	2018.28	1529.17	1146.8	2664.66	2233.06	1741.34	1408.81	863.653	AXJ94106.1|NAC domain containing transcription factor NAC6 [Fagopyrum tataricum]	AT1G01720 | ATAF1, ANAC002 , NAC (No Apical Meristem) domain transcriptional regulator superfamily protein	C5
FtPinG0003005100.01	767.985	459.116	555.582	1642.9	1319.12	745.327	1079.51	1388.53	1667.34	746.945	818.362	804.894	XP_019152321.1|PREDICTED: ethylene-responsive transcription factor RAP2-1-like [Ipomoea nil]	AT4G36900 | RAP2.10, DEAR4 , related to AP2 10	C5
FtPinG0006421500.01	744.527	806.747	604.633	2900.71	1307.25	1254.73	1131.95	1856.38	1905.99	1153.53	1129.94	1093.15	NP_001268154.1|CBL-interacting protein kinase 07 [Vitis vinifera]	AT5G58380 | CIPK10, PKS2, SIP1, SNRK3.8 , SOS3-interacting protein 1	C5
FtPinG0005328500.01	685.373	1468.56	858.9	863.678	2487.81	2525.83	2291.61	2802.76	3561.61	1930.83	1712.69	1378.08	XP_002310286.2|probable leucine-rich repeat receptor-like protein kinase At1g35710 isoform X2 [Populus trichocarpa]	AT2G33170 | Leucine-rich repeat receptor-like protein kinase family protein	C5
FtPinG0002143600.01	675.174	466.21	761.798	2683.54	1744.32	1022.66	1689.03	1951.66	1591.7	1355.91	1332.84	1665.22	XP_027091459.1|bZIP transcription factor 46-like [Coffea arabica]	AT1G45249 | ABF2, AREB1, ATAREB1 , abscisic acid responsive elements-binding factor 2	C5
FtPinG0001185100.01	577.264	381.076	402.422	947.13	642.143	605.699	777.724	933.541	1165.54	540.891	727.967	845.914	XP_027083096.1|heat stress transcription factor B-2b-like [Coffea arabica]	AT4G11660 | AT-HSFB2B, HSFB2B , winged-helix DNA-binding transcription factor family protein	C5
FtPinG0000828100.01	545.647	927.353	682.715	832.51	1330.21	1689.02	1392.18	2020.17	2563.33	1459.85	1149.17	695.135	XP_021666218.1|chitotriosidase-1-like [Hevea brasiliensis]	AT4G19810 | Glycosyl hydrolase family protein with chitinase insertion domain	C5
FtPinG0004850700.01	528.308	212.835	362.38	4255.05	2585.2	944.659	1550.5	2226.79	2386.48	1199.53	1949.26	1551.03	XP_012090097.1|probable protein phosphatase 2C 8 [Jatropha curcas]	AT2G29380 | HAI3 , highly ABA-induced PP2C gene 3	C5
FtPinG0002020200.01	520.149	752.018	498.522	1111.02	885.222	813.697	1214.08	1317.88	1148.49	1159.05	901.063	579.834	AUS89428.1|sulfate transporter [Sesuvium portulacastrum]	AT1G22150 | SULTR1;3 , sulfate transporter 1;3	C5
FtPinG0006326200.01	519.129	916.205	684.717	1690.16	1396.72	1162.29	707.471	1491.31	1588.5	875.728	1405.93	1256.12	-	-	C5
FtPinG0008099600.01	515.05	602.019	536.562	1149.23	744.284	602.81	859.85	1240.8	1454.26	674.274	641.419	645.245	XP_019232947.1|PREDICTED: uncharacterized protein LOC109213585 [Nicotiana attenuata]	AT5G64510 | TIN1 , unknown protein; FUNCTIONS IN: molecular_function unknown; INVOLVED IN: biological_process unknown; LOCATED IN: endomembrane system; EXPRESSED IN: 17 plant structures; EXPRESSED DURING: 10 growth stages; Has 35333 Blast hits to 34131 proteins in 2444 species: Archae - 798; Bacteria - 22429; Metazoa - 974; Fungi - 991; Plants - 531; Viruses - 0; Other Eukaryotes - 9610 (source: …	C5
FtPinG0002024800.01	488.532	892.894	1214.27	1791.71	1821.12	1470.43	1496.08	3614.26	2523.92	1131.46	977.995	1332.62	XP_009133125.1|PREDICTED: aquaporin PIP2-2-like [Brassica rapa]	AT2G37170 | PIP2B, PIP2;2 , plasma membrane intrinsic protein 2	C5
FtPinG0003045600.01	475.274	264.524	533.559	4264.1	2984.26	1920.13	1725.64	3563.94	2422.7	1510.45	1571.33	1507.79	XP_010696526.1|PREDICTED: heat stress transcription factor A-7a [Beta vulgaris subsp. vulgaris]	AT2G26150 | ATHSFA2, HSFA2 , heat shock transcription factor A2	C5
FtPinG0003081000.01	463.035	524.993	683.716	1392.54	1182.94	857.03	969.681	1180.84	1109.07	951.158	847.211	762.764	XP_021745833.1|protein NRT1/ PTR FAMILY 3.1-like [Chenopodium quinoa]	AT1G68570 | Major facilitator superfamily protein	C5
FtPinG0001553400.01	463.035	566.547	444.466	1323.17	986.572	818.512	641.177	1230.09	1231.59	535.372	479.862	407.99	XP_010069444.1|PREDICTED: UV-B-induced protein At3g17800, chloroplastic [Eucalyptus grandis]	AT3G17800 | Protein of unknown function (DUF760)	C5
FtPinG0004780200.01	422.239	322.293	423.444	1114.03	940.648	522.885	620.398	707.65	648.824	296.202	455.821	527.726	PSS25979.1|Heavy metal-associated isoprenylated plant protein [Actinidia chinensis var. chinensis]	AT4G38580 | ATFP6, HIPP26, FP6 , farnesylated protein 6	C5
FtPinG0007802700.01	397.761	424.657	400.419	1884.21	1301.7	689.476	441.304	980.646	940.742	524.333	569.295	451.228	XP_015896868.1|abscisic acid receptor PYR1-like [Ziziphus jujuba]	AT4G17870 | PYR1, RCAR11 , Polyketide cyclase/dehydrase and lipid transport superfamily protein	C5
FtPinG0004051800.01	386.542	359.793	542.568	1919.4	1144.93	1217.18	587.745	1602.65	1055.8	1050.51	1076.08	1000.02	EPS67507.1|hypothetical protein M569_07268 [Genlisea aurea]	AT1G03790 | SOM , Zinc finger C-x8-C-x5-C-x3-H type family protein	C5
FtPinG0000613600.01	384.502	392.225	325.341	679.682	913.727	849.326	516.503	1028.82	926.892	668.755	483.709	545.465	XP_002533895.1|probable E3 ubiquitin-protein ligase XERICO [Ricinus communis]	AT2G04240 | XERICO , RING/U-box superfamily protein	C5
FtPinG0001329200.01	377.363	1031.74	310.325	581.148	1137.8	1542.65	1059.72	1912.05	2315.1	1377.98	970.302	564.312	XP_010682577.1|PREDICTED: aldehyde dehydrogenase family 2 member B7, mitochondrial isoform X1 [Beta vulgaris subsp. vulgaris]	AT1G23800 | ALDH2B7, ALDH2B , aldehyde dehydrogenase 2B7	C5
FtPinG0009743100.01	370.224	88.1746	221.232	2236.11	1417.31	402.515	661.956	994.564	1092.03	255.727	471.207	243.907	PON52853.1|EID1-like F-box protein [Trema orientale]	AT3G63060 | EDL3 , EID1-like 3	C5
FtPinG0008150000.01	341.667	143.917	196.206	1913.36	920.853	382.293	895.471	1337.15	1393.53	581.366	831.825	850.349	XP_020203586.1|uncharacterized protein LOC109789115 [Cajanus cajan]	AT4G17940 | Tetratricopeptide repeat (TPR)-like superfamily protein	C5
FtPinG0003958100.01	326.368	162.16	319.335	4353.58	2177.43	880.141	1091.39	2209.67	1315.76	1275.88	1699.23	908	XP_017438670.1|PREDICTED: zinc finger CCCH domain-containing protein 20 [Vigna angularis]	AT2G19810 | CCCH-type zinc finger family protein	C5
FtPinG0008133700.01	321.269	527.02	294.308	863.678	716.571	714.513	1271.47	1056.66	872.557	955.758	711.619	358.1	XP_021848204.1|pleiotropic drug resistance protein 1 [Spinacia oleracea]	AT1G15520 | PDR12, ATPDR12, ABCG40, ATABCG40 , pleiotropic drug resistance 12	C5
FtPinG0006787600.01	310.05	456.075	263.276	523.838	603.345	864.734	505.619	764.39	1750.44	508.695	449.089	221.734	XP_010684355.1|PREDICTED: late embryogenesis abundant protein Lea5 [Beta vulgaris subsp. vulgaris]	AT4G15910 | ATDI21, DI21 , drought-induced 21	C5
FtPinG0001402500.01	306.99	627.357	509.534	1574.53	1155.22	689.476	714.398	1240.8	1363.7	656.796	696.233	603.116	XP_021846586.1|GDSL esterase/lipase EXL3-like [Spinacia oleracea]	AT1G75900 | GDSL-like Lipase/Acylhydrolase superfamily protein	C5
FtPinG0005737800.01	306.99	293.915	339.356	825.471	537.626	386.145	552.124	703.367	774.541	476.499	547.177	577.617	AEQ30067.1|phytoene synthase, partial [Mangifera indica]	AT5G17230 | PSY , PHYTOENE SYNTHASE	C5
FtPinG0007888700.01	289.652	196.619	343.36	1188.44	543.169	322.59	488.798	671.25	525.239	478.339	580.835	493.358	XP_021596252.1|heat stress transcription factor C-1-like [Manihot esculenta]	AT3G24520 | AT-HSFC1, HSFC1 , heat shock transcription factor C1	C5
FtPinG0001256300.01	279.453	280.74	271.284	605.279	861.469	454.515	552.124	283.702	148.09	118.665	138.477	149.67	XP_010275912.1|PREDICTED: tyrosine/DOPA decarboxylase 2-like [Nelumbo nucifera]	AT2G20340 | Pyridoxal phosphate (PLP)-dependent transferases superfamily protein	C5
FtPinG0003996100.01	266.194	231.078	170.178	845.58	268.417	280.22	275.073	582.392	599.816	343.116	611.608	303.775	EOX93567.1|RING/U-box superfamily protein, putative [Theobroma cacao]	AT2G04240 | XERICO , RING/U-box superfamily protein	C5
FtPinG0004387600.01	264.154	186.484	141.148	1627.82	737.158	284.072	577.851	845.754	787.325	496.737	709.696	362.535	XP_012069283.1|protein JINGUBANG [Jatropha curcas]	AT3G18950 | Transducin/WD40 repeat-like superfamily protein	C5
FtPinG0008061900.01	263.134	411.481	269.282	1441.81	706.278	665.402	443.283	999.916	1152.75	649.437	667.383	702.896	RDX94919.1|Remorin 4.1, partial [Mucuna pruriens]	AT3G57540 | Remorin family protein	C5
FtPinG0004973800.01	251.915	265.537	107.112	790.281	785.457	289.849	1112.16	356.501	591.293	97.5075	835.671	201.778	AGI36543.1|trypsin inhibitor [Fagopyrum tataricum]	AT2G38870 | Serine protease inhibitor, potato inhibitor I-type family protein	C5
FtPinG0003188700.01	249.876	194.592	226.237	593.213	509.913	504.588	326.525	480.688	386.738	232.73	271.185	249.451	XP_021728473.1|U-box domain-containing protein 4-like [Chenopodium quinoa]	AT3G01400 | ARM repeat superfamily protein	C5
FtPinG0001748800.01	249.876	275.672	199.209	1245.75	603.345	344.738	393.809	717.285	797.979	425.906	486.594	471.184	XP_021856903.1|homeobox-leucine zipper protein ATHB-12-like [Spinacia oleracea]	AT2G46680 | ATHB-7, ATHB7, HB-7 , homeobox 7	C5
FtPinG0004514300.01	232.537	248.308	194.203	775.199	632.641	467.996	380.946	746.19	671.197	426.825	406.777	280.493	XP_021865678.1|U-box domain-containing protein 4 [Spinacia oleracea]	AT3G03440 | ARM repeat superfamily protein	C5
FtPinG0008306500.01	224.378	338.509	269.282	1059.74	594.635	514.218	441.304	871.447	1012.12	585.965	626.994	410.208	ACM78620.1|non-specific lipid-transfer protein type 2 [Tamarix hispida]	AT3G18280 | Bifunctional inhibitor/lipid-transfer protein/seed storage 2S albumin superfamily protein	C5
FtPinG0003310400.01	224.378	133.782	249.261	1310.1	595.427	270.59	488.798	503.17	299.375	454.422	746.238	228.386	XP_006372730.1|zinc finger CCCH domain-containing protein 2 [Populus trichocarpa]	AT1G03790 | SOM , Zinc finger C-x8-C-x5-C-x3-H type family protein	C5
FtPinG0000731500.01	220.298	242.227	268.281	841.559	543.169	378.441	572.903	811.495	674.394	614.481	572.18	557.66	XP_009788324.1|PREDICTED: monoglyceride lipase-like [Nicotiana sylvestris]	AT1G73480 | alpha/beta-Hydrolases superfamily protein	C5
FtPinG0005751900.01	220.298	202.7	260.273	876.749	519.415	397.7	338.399	646.627	431.484	479.259	426.971	422.403	XP_021893857.1|CBL-interacting serine/threonine-protein kinase 14-like [Carica papaya]	AT5G01820 | ATSR1, SnRK3.15, CIPK14, ATCIPK14, SR1 , serine/threonine protein kinase 1	C5
FtPinG0005010200.01	211.119	687.154	223.234	379.053	586.717	613.402	840.06	966.729	1283.8	539.971	318.305	236.146	PSS24693.1|External alternative NAD(P)H-ubiquinone oxidoreductase [Actinidia chinensis var. chinensis]	AT4G05020 | NDB2 , NAD(P)H dehydrogenase B2	C5
FtPinG0006392100.01	210.099	146.958	159.167	459.489	374.517	312.96	273.094	375.772	290.852	229.051	282.724	236.146	ATO91436.1|putative cytochrome P450 [Fallopia multiflora]	AT2G45580 | CYP76C3 , cytochrome P450, family 76, subfamily C, polypeptide 3	C5
FtPinG0009560900.01	207.04	643.573	158.166	729.954	828.214	1154.58	989.47	1219.38	1458.52	700.95	656.805	635.267	XP_021750977.1|endochitinase EP3-like [Chenopodium quinoa]	AT3G54420 | ATEP3, ATCHITIV, CHIV, EP3 , homolog of carrot EP3-3 chitinase	C5
FtPinG0000370600.01	205	123.647	183.192	515.794	527.333	281.183	422.504	422.877	323.879	277.805	364.464	297.123	XP_002264981.1|PREDICTED: protein LATE FLOWERING [Vitis vinifera]	AT1G80730 | ZFP1, ATZFP1 , zinc-finger protein 1	C5
FtPinG0006960700.01	200.92	172.295	211.221	1468.96	642.143	325.479	523.43	715.144	476.231	483.858	403.892	321.514	XP_018809669.1|PREDICTED: beta-carotene hydroxylase 2, chloroplastic-like [Juglans regia]	AT4G25700 | BETA-OHASE 1, B1, chy1, BCH1 , beta-hydroxylase 1	C5
FtPinG0002370000.01	198.881	236.146	262.275	1616.76	773.58	397.7	224.61	416.453	461.315	326.558	437.55	376.947	XP_021611800.1|galactinol synthase 1 [Manihot esculenta]	AT1G56600 | AtGolS2, GolS2 , galactinol synthase 2	C5
FtPinG0007231300.01	195.821	349.658	138.145	230.247	274.752	439.108	418.546	564.193	840.595	418.547	172.135	140.801	XP_012091677.1|glutaredoxin-C9 [Jatropha curcas]	AT1G28480 | GRX480, roxy19 , Thioredoxin superfamily protein	C5
FtPinG0008386300.01	194.801	247.294	274.287	739.003	703.111	447.774	638.208	995.634	906.649	404.748	563.525	334.818	PSS21467.1|Mannitol dehydrogenase [Actinidia chinensis var. chinensis]	AT4G37980 | ELI3-1, ELI3, ATCAD7, CAD7 , elicitor-activated gene 3-1	C5
FtPinG0008918600.01	194.801	136.823	217.228	584.164	399.855	394.812	196.905	399.324	304.702	287.923	260.606	298.232	XP_002279393.2|PREDICTED: heat stress transcription factor A-7a [Vitis vinifera]	AT2G26150 | ATHSFA2, HSFA2 , heat shock transcription factor A2	C5
FtPinG0003079000.01	194.801	185.471	200.21	934.06	456.072	351.479	707.471	783.66	523.108	799.378	820.285	257.211	XP_010251861.1|PREDICTED: calmodulin-binding protein 25-like [Nelumbo nucifera]	AT2G41010 | ATCAMBP25, CAMBP25 , calmodulin (CAM)-binding protein of 25 kDa	C5
FtPinG0007574700.01	188.682	213.849	201.211	644.491	384.019	437.182	253.304	704.438	719.14	322.879	389.467	392.469	XP_012487197.1|PREDICTED: heat stress transcription factor A-6b [Gossypium raimondii]	AT3G22830 | AT-HSFA6B, HSFA6B , heat shock transcription factor A6B	C5
FtPinG0006592700.01	187.662	185.471	167.175	525.848	550.295	534.44	473.956	761.178	778.802	237.33	228.872	205.104	PSR95333.1|Ubiquitin like [Actinidia chinensis var. chinensis]	AT4G05050 | UBQ11 , ubiquitin 11	C5
FtPinG0001071300.01	184.602	379.049	224.235	724.927	728.448	379.404	455.156	766.531	996.142	445.223	427.933	311.536	-	-	C5
FtPinG0006521200.01	182.562	357.766	177.186	228.236	916.894	1395.32	1019.15	1933.46	1755.77	621.841	439.473	528.835	XP_021856881.1|probable glucan 1,3-beta-glucosidase A [Spinacia oleracea]	-	C5
FtPinG0000782000.01	178.483	164.187	152.159	456.473	343.637	163.702	261.22	398.254	403.784	192.255	195.214	146.344	XP_003635677.2|PREDICTED: putative receptor-like protein kinase At4g00960 [Vitis vinifera]	AT4G05200 | CRK25 , cysteine-rich RLK (RECEPTOR-like protein kinase) 25	C5
FtPinG0007012600.01	175.423	131.755	172.18	486.636	375.309	252.294	297.831	368.278	448.53	211.573	348.116	268.298	XP_021290455.1|auxin-induced protein 22B-like [Herrania umbratica]	AT5G43700 | ATAUX2-11, IAA4 , AUX/IAA transcriptional regulator family protein	C5
FtPinG0001393800.01	174.403	178.376	174.182	606.284	423.608	207.998	369.072	425.018	316.422	224.451	258.683	157.431	XP_024457640.1|inositol-tetrakisphosphate 1-kinase 3 isoform X1 [Populus trichocarpa]	AT4G08170 | Inositol 1,3,4-trisphosphate 5/6-kinase family protein	C5
FtPinG0006603600.01	173.383	291.888	154.162	381.064	252.581	315.849	295.852	499.958	658.413	287.923	196.176	207.321	OMO98448.1|Oxoglutarate/iron-dependent dioxygenase [Corchorus olitorius]	AT3G21420 | 2-oxoglutarate (2OG) and Fe(II)-dependent oxygenase superfamily protein	C5
FtPinG0002508000.01	172.363	64.8641	88.0923	706.829	412.523	258.072	298.82	393.971	285.525	219.852	184.636	251.668	PPD83505.1|hypothetical protein GOBAR_DD19561 [Gossypium barbadense]	AT4G29190 | Zinc finger C-x8-C-x5-C-x3-H type family protein	C5
FtPinG0000281400.01	171.343	230.065	315.33	589.192	636.6	525.773	70.2524	739.767	400.588	86.469	207.716	110.867	XP_016671928.1|PREDICTED: transcription factor UNE10-like [Gossypium hirsutum]	AT4G00050 | UNE10 , basic helix-loop-helix (bHLH) DNA-binding superfamily protein	C5
FtPinG0003129200.01	171.343	240.2	243.255	1126.1	638.184	364.96	439.325	665.897	563.593	460.861	435.626	345.905	PSR91220.1|ABC transporter G family member 21 like [Actinidia chinensis var. chinensis]	AT3G25620 | ABC-2 type transporter family protein	C5
FtPinG0000035900.01	167.264	114.526	78.0818	515.794	279.502	153.11	312.673	308.325	303.637	170.178	150.017	187.365	XP_021755806.1|protein JINGUBANG-like [Chenopodium quinoa]	AT2G26490 | Transducin/WD40 repeat-like superfamily protein	C5
FtPinG0004973400.01	158.085	193.579	107.112	715.878	676.19	140.591	768.818	250.514	612.601	40.4748	709.696	100.889	AGI36543.1|trypsin inhibitor [Fagopyrum tataricum]	AT2G38870 | Serine protease inhibitor, potato inhibitor I-type family protein	C5
FtPinG0006215000.01	155.025	136.823	141.148	320.737	257.332	206.072	254.294	426.089	382.476	216.172	259.645	238.364	PSS20740.1|STE20-like serine/threonine-protein kinase [Actinidia chinensis var. chinensis]	AT5G35320 | unknown protein; Has 1807 Blast hits to 1807 proteins in 277 species: Archae - 0; Bacteria - 0; Metazoa - 736; Fungi - 347; Plants - 385; Viruses - 0; Other Eukaryotes - 339 (source: NCBI BLink).	C5
FtPinG0003131500.01	152.985	71.9586	85.0891	1678.09	738.741	180.073	340.378	733.343	474.1	316.44	710.657	242.798	AGS79173.1|9-cis epoxycarotenoid dioxygenase, partial [Fagopyrum tataricum]	AT3G14440 | NCED3, ATNCED3, STO1, SIS7 , nine-cis-epoxycarotenoid dioxygenase 3	C5
FtPinG0003754800.01	151.965	138.85	163.171	550.985	650.852	413.108	361.157	608.086	579.574	364.273	358.694	292.689	XP_017636586.1|PREDICTED: septum-promoting GTP-binding protein 1-like [Gossypium arboreum]	AT3G21700 | SGP2 , Ras-related small GTP-binding family protein	C5
FtPinG0003207300.01	147.886	172.295	206.216	1420.7	730.031	333.182	338.399	1043.81	1147.43	452.582	891.447	411.316	XP_012066508.1|uncharacterized protein LOC105629509 [Jatropha curcas]	AT3G10020 | unknown protein; FUNCTIONS IN: molecular_function unknown; INVOLVED IN: response to oxidative stress, anaerobic respiration; LOCATED IN: cellular_component unknown; EXPRESSED IN: 23 plant structures; EXPRESSED DURING: 13 growth stages; Has 47 Blast hits to 47 proteins in 12 species: Archae - 0; Bacteria - 0; Metazoa - 1; Fungi - 0; Plants - 46; Viruses - 0; Other Eukaryotes - 0 (sourc…	C5
FtPinG0008396800.01	142.786	108.445	139.146	925.011	498.037	309.109	211.747	541.711	377.149	228.131	302.919	221.734	KZV58826.1|hypothetical protein F511_18663 [Dorcoceras hygrometricum]	AT1G52140 | unknown protein; BEST Arabidopsis thaliana protein match is: unknown protein (TAIR:AT3G16330.1); Has 114 Blast hits to 114 proteins in 15 species: Archae - 0; Bacteria - 0; Metazoa - 0; Fungi - 0; Plants - 114; Viruses - 0; Other Eukaryotes - 0 (source: NCBI BLink).	C5
FtPinG0009342300.01	141.766	125.674	144.151	330.792	241.496	247.479	150.399	358.642	487.95	269.526	234.642	149.67	XP_021744976.1|uncharacterized protein LOC110710944 isoform X2 [Chenopodium quinoa]	AT2G01275 | RING/FYVE/PHD zinc finger superfamily protein	C5
FtPinG0006346100.01	141.766	94.2556	132.138	1309.09	702.319	278.294	257.262	632.709	579.574	244.689	533.714	236.146	XP_021715409.1|probable protein phosphatase 2C 24 [Chenopodium quinoa]	AT2G29380 | HAI3 , highly ABA-induced PP2C gene 3	C5
FtPinG0006725700.01	140.746	66.8911	122.128	676.665	323.843	184.887	213.726	538.499	501.8	149.021	325.037	158.54	XP_019459787.1|PREDICTED: 17.4 kDa class III heat shock protein isoform X3 [Lupinus angustifolius]	AT1G54050 | HSP20-like chaperones superfamily protein	C5
FtPinG0004692900.01	139.726	59.7965	273.286	1244.74	867.011	334.145	332.462	618.792	347.318	227.211	321.19	206.212	XP_025683816.1|protein NRT1/ PTR FAMILY 6.2-like [Arachis hypogaea]	AT2G26690 | Major facilitator superfamily protein	C5
FtPinG0003531700.01	137.687	177.363	195.204	515.794	410.94	219.554	319.599	309.396	403.784	175.698	213.486	172.952	XP_002277953.1|PREDICTED: zinc finger protein CONSTANS-LIKE 5 [Vitis vinifera]	AT5G57660 | ATCOL5, COL5 , CONSTANS-like 5	C5
FtPinG0009223600.01	136.667	156.079	135.142	488.647	181.32	219.554	393.809	532.075	692.505	413.947	76.9318	216.19	PSR90030.1|Aquaporin TIP1-3 like [Actinidia chinensis var. chinensis]	AT4G01470 | GAMMA-TIP3, TIP1;3, ATTIP1.3 , tonoplast intrinsic protein 1;3	C5
FtPinG0007986000.01	131.567	360.806	85.0891	363.972	420.441	355.33	475.935	664.827	688.244	431.425	336.577	279.385	XP_023883926.1|geraniol 8-hydroxylase-like [Quercus suber]	AT2G45570 | CYP76C2 , cytochrome P450, family 76, subfamily C, polypeptide 2	C5
FtPinG0006630900.01	130.547	275.672	222.233	862.673	536.043	357.256	327.515	843.613	640.301	500.416	485.632	495.575	XP_007014761.1|PREDICTED: uncharacterized protein LOC18589643 [Theobroma cacao]	AT5G19875 | unknown protein; FUNCTIONS IN: molecular_function unknown; INVOLVED IN: response to oxidative stress; LOCATED IN: endomembrane system; EXPRESSED IN: 21 plant structures; EXPRESSED DURING: 13 growth stages; BEST Arabidopsis thaliana protein match is: unknown protein (TAIR:AT2G31940.1); Has 30201 Blast hits to 17322 proteins in 780 species: Archae - 12; Bacteria - 1396; Metazoa - 17338;…	C5
FtPinG0003149600.01	128.507	224.997	296.31	1076.83	723.697	540.218	300.799	1444.2	751.102	364.273	537.561	426.838	XP_010678288.1|PREDICTED: bidirectional sugar transporter N3 [Beta vulgaris subsp. vulgaris]	AT3G48740 | SWEET11, AtSWEET11 , Nodulin MtN3 family protein	C5
FtPinG0001033300.01	126.468	182.43	110.115	176.959	222.493	201.258	254.294	298.69	341.991	170.178	135.592	115.302	GAY47977.1|hypothetical protein CUMW_108480 [Citrus unshiu]	AT1G27760 | SAT32, ATSAT32 , interferon-related developmental regulator family protein / IFRD protein family	C5
FtPinG0008061600.01	123.408	178.376	98.1028	203.1	293.755	295.627	286.946	343.654	429.353	171.098	156.749	116.41	XP_021893397.1|calcium-dependent protein kinase 32 [Carica papaya]	AT5G12480 | CPK7 , calmodulin-domain protein kinase 7	C5
FtPinG0003141900.01	121.368	124.661	154.162	1298.03	597.011	297.553	400.735	810.425	641.366	444.303	421.202	293.797	XP_021756708.1|ninja-family protein AFP2-like [Chenopodium quinoa]	AT1G69260 | AFP1 , ABI five binding protein	C5
FtPinG0003233400.01	121.368	167.228	142.149	673.649	407.772	581.625	30.6736	589.886	431.484	110.386	55.7755	85.3675	AGQ42619.1|GA2ox7 [Vitis vinifera]	AT4G21200 | ATGA2OX8, GA2OX8 , gibberellin 2-oxidase 8	C5
FtPinG0003339300.01	119.328	121.62	102.107	294.596	237.537	171.406	136.547	206.621	128.913	131.543	132.707	116.41	XP_002275775.1|PREDICTED: zinc finger CCCH domain-containing protein 3 [Vitis vinifera]	AT1G04990 | Zinc finger C-x8-C-x5-C-x3-H type family protein	C5
FtPinG0000246400.01	119.328	62.837	88.0923	1020.53	406.981	198.369	277.052	553.487	206.686	254.807	326.96	197.343	OMO92680.1|Carotenoid oxygenase [Corchorus olitorius]	AT3G14440 | NCED3, ATNCED3, STO1, SIS7 , nine-cis-epoxycarotenoid dioxygenase 3	C5
FtPinG0003758900.01	116.269	122.634	95.0996	357.939	231.995	183.924	298.82	337.231	513.519	234.57	188.483	196.234	-	-	C5
FtPinG0008126800.01	116.269	117.566	78.0818	712.861	792.583	161.776	285.957	295.479	247.171	168.338	162.518	133.04	XP_018846391.1|PREDICTED: ethylene-responsive transcription factor ERF061 [Juglans regia]	AT1G64380 | Integrase-type DNA-binding superfamily protein	C5
FtPinG0008658900.01	114.229	182.43	236.247	147.801	1039.62	251.331	297.831	402.536	470.904	291.603	467.361	274.95	AKQ00062.1|expansin 2 [Fagopyrum tataricum]	AT2G40610 | ATEXPA8, EXP8, ATEXP8, ATHEXP ALPHA 1.11, EXPA8 , expansin A8	C5
FtPinG0001120400.01	114.229	147.971	162.17	870.716	343.637	186.813	175.136	381.124	465.577	264.926	463.514	198.452	XP_021856834.1|cucumber peeling cupredoxin-like [Spinacia oleracea]	AT2G32300 | UCC1 , uclacyanin 1	C5
FtPinG0005009600.01	112.189	51.6885	56.0587	791.286	435.485	94.3696	128.631	252.656	295.114	117.745	209.639	115.302	XP_021293847.1|transcription factor MYB102-like [Herrania umbratica]	AT4G21440 | ATMYB102, ATM4, MYB102 , MYB-like 102	C5
FtPinG0007630000.01	111.169	120.607	108.113	317.721	264.458	256.146	141.494	210.903	265.283	137.062	143.285	114.193	XP_016189426.1|uncharacterized protein LOC107630723 [Arachis ipaensis]	AT5G41810 | unknown protein; BEST Arabidopsis thaliana protein match is: unknown protein (TAIR:AT1G64340.1); Has 876 Blast hits to 690 proteins in 132 species: Archae - 0; Bacteria - 38; Metazoa - 180; Fungi - 112; Plants - 59; Viruses - 2; Other Eukaryotes - 485 (source: NCBI BLink).	C5
FtPinG0002631400.01	111.169	108.445	73.0766	307.667	242.288	378.441	536.293	673.391	614.732	282.404	215.409	161.866	XP_010675055.1|PREDICTED: phosphoenolpyruvate carboxylase kinase 2 [Beta vulgaris subsp. vulgaris]	AT1G08650 | PPCK1, ATPPCK1 , phosphoenolpyruvate carboxylase kinase 1	C5
FtPinG0002267300.01	110.149	82.0936	61.064	274.487	139.355	145.406	138.526	234.456	186.444	155.46	201.946	89.8022	ALY11153.1|bHLH4 [Fagopyrum tataricum]	AT1G61660 | basic helix-loop-helix (bHLH) DNA-binding superfamily protein	C5
FtPinG0004036900.01	108.109	139.863	121.127	265.438	252.581	256.146	165.242	307.255	259.956	169.258	225.025	273.841	XP_021746125.1|phosphatidylinositol transfer protein 1-like isoform X1 [Chenopodium quinoa]	-	C5
FtPinG0006995900.01	105.05	164.187	69.0724	287.558	152.024	219.554	150.399	284.773	384.607	218.012	221.179	127.497	XP_017419752.1|PREDICTED: uncharacterized protein LOC108329889 [Vigna angularis]	AT1G59590 | ZCF37 , ZCF37	C5
FtPinG0001408200.01	100.97	126.688	156.164	657.562	318.3	188.739	246.378	308.325	328.141	248.368	250.99	215.082	XP_021774271.1|CSC1-like protein RXW8 isoform X2 [Chenopodium quinoa]	AT1G58520 | RXW8 , lipases;hydrolases, acting on ester bonds	C5
FtPinG0003292400.01	95.8706	109.458	138.145	285.547	404.605	311.997	238.462	369.348	281.264	144.422	316.382	238.364	XP_021720147.1|uncharacterized protein LOC110687811 [Chenopodium quinoa]	AT3G07350 | Protein of unknown function (DUF506)	C5
FtPinG0006853200.01	95.8706	125.674	99.1038	1287.98	930.355	455.478	298.82	1079.14	433.615	528.932	535.638	229.494	XP_018825192.1|PREDICTED: 9-cis-epoxycarotenoid dioxygenase NCED1, chloroplastic-like [Juglans regia]	AT1G78390 | NCED9, ATNCED9 , nine-cis-epoxycarotenoid dioxygenase 9	C5
FtPinG0002809700.01	91.791	93.2421	120.126	225.22	285.045	167.554	127.642	131.681	158.744	130.623	154.825	151.888	XP_010688200.1|PREDICTED: uncharacterized protein LOC104902199 [Beta vulgaris subsp. vulgaris]	AT1G79160 | unknown protein; BEST Arabidopsis thaliana protein match is: unknown protein (TAIR:AT1G16500.1); Has 104 Blast hits to 102 proteins in 13 species: Archae - 0; Bacteria - 0; Metazoa - 0; Fungi - 0; Plants - 104; Viruses - 0; Other Eukaryotes - 0 (source: NCBI BLink).	C5
FtPinG0006313500.01	89.7512	72.9721	66.0692	251.362	188.446	257.109	107.852	267.644	185.378	38.6351	67.3153	62.0855	XP_018813643.1|PREDICTED: uncharacterized protein LOC108985699 [Juglans regia]	AT3G52740 | unknown protein; BEST Arabidopsis thaliana protein match is: unknown protein (TAIR:AT3G44450.1); Has 65 Blast hits to 65 proteins in 13 species: Archae - 0; Bacteria - 0; Metazoa - 0; Fungi - 0; Plants - 65; Viruses - 0; Other Eukaryotes - 0 (source: NCBI BLink).	C5
FtPinG0008157500.01	89.7512	53.7155	60.0629	122.664	167.86	96.2955	141.494	130.61	159.809	98.4274	61.5454	62.0855	XP_022752124.1|homeobox-leucine zipper protein ATHB-40-like [Durio zibethinus]	AT2G18550 | HB-2, ATHB21, HB21 , homeobox protein 21	C5
FtPinG0000496000.01	88.7313	70.9451	66.0692	233.264	131.437	132.888	189.978	176.645	109.735	134.303	99.0497	155.214	AUS89431.1|squamosa promoter binding protein [Sesuvium portulacastrum]	AT5G50670 | SPL13B, SPL13 , Squamosa promoter-binding protein-like (SBP domain) transcription factor family protein	C5
FtPinG0003152400.01	86.6915	127.701	137.144	305.656	330.969	169.48	134.568	228.032	164.07	145.341	236.565	192.908	XP_023908024.1|transcription factor bHLH137 [Quercus suber]	AT5G50915 | basic helix-loop-helix (bHLH) DNA-binding superfamily protein	C5
FtPinG0004404700.01	86.6915	60.81	104.109	430.331	308.799	134.814	225.599	201.268	257.825	92.9081	152.902	59.8681	XP_023513012.1|late embryogenesis abundant protein-like [Cucurbita pepo subsp. pepo]	AT2G21490 | LEA , dehydrin LEA	C5
FtPinG0001770900.01	83.6318	108.445	49.0514	421.282	333.344	152.147	96.9681	214.115	474.1	133.383	179.828	110.867	XP_002283603.1|PREDICTED: probable WRKY transcription factor 71 [Vitis vinifera]	AT4G18170 | WRKY28, ATWRKY28 , WRKY DNA-binding protein 28	C5
FtPinG0006629800.01	80.5721	128.715	128.134	293.59	186.863	207.035	151.389	359.713	382.476	207.893	252.913	209.538	PSR90251.1|hypothetical protein CEY00_Acc30451 [Actinidia chinensis var. chinensis]	AT2G44300 | Bifunctional inhibitor/lipid-transfer protein/seed storage 2S albumin superfamily protein	C5
FtPinG0008397400.01	80.5721	38.513	93.0975	436.364	360.265	149.258	238.462	484.97	330.272	251.128	283.686	196.234	KZV58826.1|hypothetical protein F511_18663 [Dorcoceras hygrometricum]	AT1G52140 | unknown protein; BEST Arabidopsis thaliana protein match is: unknown protein (TAIR:AT3G16330.1); Has 114 Blast hits to 114 proteins in 15 species: Archae - 0; Bacteria - 0; Metazoa - 0; Fungi - 0; Plants - 114; Viruses - 0; Other Eukaryotes - 0 (source: NCBI BLink).	C5
FtPinG0001235200.01	78.5323	113.512	72.0755	263.427	405.397	130.962	123.684	163.798	266.348	95.6678	117.321	65.4115	XP_022737119.1|BTB/POZ and TAZ domain-containing protein 1-like isoform X2 [Durio zibethinus]	AT3G48360 | BT2, ATBT2 , BTB and TAZ domain protein 2	C5
FtPinG0006610500.01	78.5323	65.8776	67.0703	266.443	158.358	119.406	124.673	200.197	214.144	123.264	169.25	146.344	XP_021718388.1|ninja-family protein AFP1-like [Chenopodium quinoa]	AT1G13740 | AFP2 , ABI five binding protein 2	C5
FtPinG0003131900.01	75.4726	192.565	83.087	129.703	116.393	285.035	267.157	323.313	459.184	167.419	127.899	63.1941	AKN80440.1|hydroxcinnamoyl-CoA quinate/shikimate hydroxycinnamoyl transferase 3 [Lonicera hypoglauca]	AT2G19070 | SHT , spermidine hydroxycinnamoyl transferase	C5
FtPinG0003322600.01	74.4527	64.8641	53.0556	199.078	159.942	87.6289	195.915	178.786	235.452	108.546	189.445	113.084	ATL14543.1|UDP-glycosyltransferase [Fallopia multiflora]	AT1G22360 | AtUGT85A2, UGT85A2 , UDP-glucosyl transferase 85A2	C5
FtPinG0008662700.01	72.4129	59.7965	39.0409	212.149	144.898	133.851	118.736	222.679	257.825	72.6707	70.2003	79.8242	XP_004303825.1|PREDICTED: B-box zinc finger protein 32 [Fragaria vesca subsp. vesca]	AT3G21150 | BBX32 , B-box 32	C5
FtPinG0007278400.01	71.393	73.9856	86.0902	339.841	192.405	125.184	192.947	299.761	292.983	180.297	268.3	192.908	XP_021298712.1|probable plastidic glucose transporter 3 isoform X1 [Herrania umbratica]	AT1G79820 | SGB1 , Major facilitator superfamily protein	C5
FtPinG0003078200.01	70.3731	157.093	63.0661	147.801	152.816	215.702	241.431	292.267	300.441	224.451	141.362	87.5848	XP_010673203.1|PREDICTED: E3 ubiquitin-protein ligase At4g11680 [Beta vulgaris subsp. vulgaris]	AT1G68070 | Zinc finger, C3HC4 type (RING finger) family protein	C5
FtPinG0008304200.01	67.3134	73.9856	110.115	366.988	312.757	185.85	126.652	202.339	125.716	104.867	95.2031	73.1722	XP_021858347.1|uncharacterized protein LOC110797535 [Spinacia oleracea]	AT2G01300 | unknown protein; BEST Arabidopsis thaliana protein match is: unknown protein (TAIR:AT1G15010.1); Has 73 Blast hits to 73 proteins in 12 species: Archae - 0; Bacteria - 0; Metazoa - 0; Fungi - 0; Plants - 73; Viruses - 0; Other Eukaryotes - 0 (source: NCBI BLink).	C5
FtPinG0009283400.01	66.2935	58.783	83.087	187.013	126.687	155.999	67.284	118.834	80.9698	60.7122	50.9673	52.1074	XP_021838386.1|uncharacterized protein LOC110778130 isoform X2 [Spinacia oleracea]	AT1G64050 | unknown protein; Has 524 Blast hits to 342 proteins in 101 species: Archae - 0; Bacteria - 106; Metazoa - 106; Fungi - 24; Plants - 25; Viruses - 0; Other Eukaryotes - 263 (source: NCBI BLink).	C5
FtPinG0007568200.01	66.2935	48.648	61.064	124.675	140.147	114.592	138.526	175.574	154.482	81.8695	107.704	146.344	XP_002282737.1|PREDICTED: uncharacterized protein LOC100251046 [Vitis vinifera]	AT3G22540 | Protein of unknown function (DUF1677)	C5
FtPinG0005293200.01	64.2537	140.877	81.0849	148.806	131.437	223.406	221.641	259.079	191.771	245.609	156.749	73.1722	XP_007220301.1|phospholipid-transporting ATPase 1 isoform X1 [Prunus persica]	AT5G04930 | ALA1 , aminophospholipid ATPase 1	C5
FtPinG0005347300.01	59.1542	59.7965	51.0535	217.176	112.434	90.5178	52.4419	169.151	273.806	76.3502	280.801	37.6947	XP_006338562.1|PREDICTED: uncharacterized protein LOC102592047 [Solanum tuberosum]	AT3G27880 | Protein of unknown function (DUF1645)	C5
FtPinG0003196200.01	58.1343	135.809	81.0849	1161.29	559.005	211.85	408.651	626.286	655.217	226.291	444.281	267.189	XP_027091459.1|bZIP transcription factor 46-like [Coffea arabica]	AT1G45249 | ABF2, AREB1, ATAREB1 , abscisic acid responsive elements-binding factor 2	C5
FtPinG0006697600.01	58.1343	40.54	40.0419	628.404	454.488	118.443	210.757	278.349	339.86	107.626	282.724	157.431	XP_013588891.1|PREDICTED: uncharacterized protein LOC106297155 [Brassica oleracea var. oleracea]	AT3G48510 | unknown protein; BEST Arabidopsis thaliana protein match is: unknown protein (TAIR:AT5G63350.1); Has 98 Blast hits to 98 proteins in 11 species: Archae - 0; Bacteria - 0; Metazoa - 0; Fungi - 0; Plants - 98; Viruses - 0; Other Eukaryotes - 0 (source: NCBI BLink).	C5
FtPinG0009034000.01	57.1144	109.458	73.0766	743.025	237.537	117.481	156.336	232.315	232.256	164.659	247.143	154.105	XP_010676702.1|PREDICTED: abscisic acid 8'-hydroxylase 1-like [Beta vulgaris subsp. vulgaris]	AT4G19230 | CYP707A1 , cytochrome P450, family 707, subfamily A, polypeptide 1	C5
FtPinG0002227700.01	57.1144	76.0126	20.021	109.594	107.684	176.221	229.557	328.666	352.645	194.095	103.858	65.4115	XP_021765481.1|germin-like protein subfamily 1 member 17 [Chenopodium quinoa]	AT3G05950 | RmlC-like cupins superfamily protein	C5
FtPinG0001865900.01	56.0945	40.54	32.0336	542.941	281.086	197.406	162.273	448.571	535.893	192.255	325.998	100.889	XP_010524451.1|PREDICTED: uncharacterized protein LOC104802506 [Tarenaya hassleriana]	AT2G44670 | Protein of unknown function (DUF581)	C5
FtPinG0005509700.01	54.0547	86.1476	69.0724	85.4629	108.475	105.925	185.031	179.856	227.994	101.187	72.1235	55.4334	XP_021656669.1|uncharacterized protein LOC110647239 [Hevea brasiliensis]	AT5G40850 | UPM1 , urophorphyrin methylase 1	C5
FtPinG0002272200.01	53.0348	43.5805	19.0199	222.204	117.185	43.333	57.3893	113.481	159.809	84.6292	125.014	65.4115	PIN18566.1|Transcription factor, Myb superfamily [Handroanthus impetiginosus]	AT4G21440 | ATMYB102, ATM4, MYB102 , MYB-like 102	C5
FtPinG0007038600.01	52.0149	32.432	35.0367	153.833	122.728	41.4071	124.673	119.904	111.866	53.3532	88.4715	76.4982	XP_027124583.1|expansin-A10-like [Coffea arabica]	AT2G03090 | ATEXPA15, EXP15, ATEXP15, ATHEXP ALPHA 1.3, EXPA15 , expansin A15	C5
FtPinG0001228200.01	49.9751	64.8641	37.0388	72.3921	77.5955	122.295	110.821	202.339	187.509	114.065	70.2003	45.4554	KZV21598.1|hypothetical protein F511_23638 [Dorcoceras hygrometricum]	AT4G18980 | AtS40-3 , AtS40-3	C5
FtPinG0005825300.01	46.9154	23.3105	19.0199	145.79	72.8448	34.6664	72.2313	74.9402	115.062	22.9971	50.9673	34.3687	XP_021853058.1|uncharacterized protein LOC110792547 [Spinacia oleracea]	AT3G48240 | Octicosapeptide/Phox/Bem1p family protein	C5
FtPinG0001448500.01	44.8756	109.458	76.0797	92.5011	101.349	199.332	168.21	216.256	262.087	141.662	81.74	50.9988	XP_021290353.1|uncharacterized protein LOC110421174 [Herrania umbratica]	AT2G32030 | Acyl-CoA N-acyltransferases (NAT) superfamily protein	C5
FtPinG0008006500.01	43.8557	76.0126	63.0661	59.3213	79.1791	148.295	106.863	168.08	174.724	114.065	50.0057	52.1074	PSS36578.1|Prolyl 4-hydroxylase [Actinidia chinensis var. chinensis]	AT5G66060 | 2-oxoglutarate (2OG) and Fe(II)-dependent oxygenase superfamily protein	C5
FtPinG0003291300.01	42.8358	24.324	56.0587	42.2287	64.9269	105.925	124.673	89.9282	88.4276	95.6678	33.6577	56.5421	XP_021763422.1|probable pectate lyase 8 [Chenopodium quinoa]	AT4G13710 | Pectin lyase-like superfamily protein	C5
FtPinG0004425400.01	42.8358	16.216	33.0346	1131.13	559.005	105.925	275.073	293.337	754.298	238.25	761.625	156.322	XP_021851377.1|late embryogenesis abundant protein 6-like [Spinacia oleracea]	AT1G32560 | Late embryogenesis abundant protein, group 1 protein	C5
FtPinG0000470400.01	40.796	33.4455	31.0325	581.148	231.995	72.2216	183.052	412.171	367.561	190.416	290.417	138.584	EOY00652.1|RING/U-box superfamily protein [Theobroma cacao]	AT1G67856 | RING/U-box superfamily protein	C5
FtPinG0003760000.01	39.7761	22.297	34.0357	295.601	142.522	73.1846	111.81	146.669	104.408	36.7953	96.1647	34.3687	XP_008455899.1|PREDICTED: mitogen-activated protein kinase kinase kinase 2-like [Cucumis melo]	AT5G55090 | MAPKKK15 , mitogen-activated protein kinase kinase kinase 15	C5
FtPinG0002753200.01	38.7562	36.486	35.0367	142.773	126.687	55.8514	77.1787	127.398	109.735	88.3087	67.3153	72.0635	AFO63283.1|bZIP4 [Tamarix hispida]	AT1G43700 | VIP1, SUE3 , VIRE2-interacting protein 1	C5
FtPinG0008057600.01	34.6766	42.567	66.0692	191.035	137.772	50.0737	80.1471	85.6459	246.106	54.2731	201.946	62.0855	WP_112918595.1|hypothetical protein [Escherichia coli]	AT3G01570 | Oleosin family protein	C5
FtPinG0007629100.01	33.6567	30.405	36.0378	182.991	95.0149	52.9625	40.5683	46.0347	93.7546	19.3175	18.2713	24.3907	XP_012090097.1|probable protein phosphatase 2C 8 [Jatropha curcas]	AT2G29380 | HAI3 , highly ABA-induced PP2C gene 3	C5
FtPinG0008028900.01	33.6567	32.432	23.0241	129.703	106.1	69.3328	80.1471	81.3636	99.0815	69.9111	51.929	39.9121	XP_008218360.1|PREDICTED: uncharacterized protein LOC103318721 [Prunus mume]	AT4G28703 | RmlC-like cupins superfamily protein	C5
FtPinG0003302500.01	33.6567	22.297	16.0168	397.151	315.133	71.2587	47.4946	102.775	485.819	50.5935	385.621	53.2161	XP_009787168.1|PREDICTED: seed biotin-containing protein SBP65-like isoform X1 [Nicotiana sylvestris]	AT2G42560 | late embryogenesis abundant domain-containing protein / LEA domain-containing protein	C5
FtPinG0008397000.01	32.6368	17.2295	35.0367	123.67	123.519	42.37	107.852	122.045	127.847	68.9912	99.0497	59.8681	AAG43551.1|Avr9/Cf-9 rapidly elicited protein 146 [Nicotiana tabacum]	AT3G16330 | unknown protein; BEST Arabidopsis thaliana protein match is: unknown protein (TAIR:AT1G52140.1); Has 109 Blast hits to 109 proteins in 16 species: Archae - 0; Bacteria - 0; Metazoa - 0; Fungi - 0; Plants - 109; Viruses - 0; Other Eukaryotes - 0 (source: NCBI BLink).	C5
FtPinG0002027400.01	31.6169	26.351	39.0409	56.305	48.2993	53.9255	63.3261	66.3756	113.997	34.0357	48.0824	44.3468	NP_001314639.1|transcription factor RAX2-like [Gossypium hirsutum]	AT5G57620 | MYB36, AtMYB36 , myb domain protein 36	C5
FtPinG0009591900.01	30.597	74.9991	32.0336	866.695	311.966	68.3698	148.421	233.385	204.555	81.8695	83.6633	62.0855	AKQ00061.1|expansin 1 [Fagopyrum tataricum]	AT1G69530 | EXPA1 , expansin A1	C5
FtPinG0005927100.01	30.597	33.4455	29.0304	72.3921	68.094	65.4809	61.3472	89.9282	87.3622	52.4333	55.7755	65.4115	XP_010107529.1|cytokinin riboside 5'-monophosphate phosphoribohydrolase LOG3 [Morus notabilis]	AT2G37210 | lysine decarboxylase family protein	C5
FtPinG0005428100.01	29.5771	28.378	47.0493	139.757	76.0119	56.8144	93.9997	111.34	143.828	45.9941	71.1619	90.9109	XP_021749805.1|histidine-containing phosphotransfer protein 4-like isoform X2 [Chenopodium quinoa]	AT3G16360 | AHP4 , HPT phosphotransmitter 4	C5
FtPinG0002722100.01	29.5771	23.3105	13.0136	932.049	334.136	74.1475	69.2629	193.774	648.824	165.579	509.673	85.3675	-	-	C5
FtPinG0004122600.01	28.5572	28.378	29.0304	59.3213	83.1381	141.554	147.431	233.385	213.079	57.0327	23.0795	59.8681	XP_021758892.1|LOW QUALITY PROTEIN: fatty acid desaturase 4, chloroplastic-like [Chenopodium quinoa]	AT4G27030 | FAD4, FADA , fatty acid desaturase A	C5
FtPinG0002878200.01	26.5174	47.6345	21.022	83.452	106.892	67.4069	78.1681	70.6579	98.0161	38.6351	42.3125	26.6081	AAP55714.1|GDSL-lipase [Oxybasis rubra]	AT3G14225 | GLIP4 , GDSL-motif lipase 4	C5
FtPinG0006414500.01	26.5174	21.2835	15.0157	25.1362	28.5045	74.1475	46.5051	47.1053	71.3813	29.4362	13.4631	14.4127	XP_006366191.1|PREDICTED: xyloglucan endotransglucosylase/hydrolase protein 24-like [Solanum tuberosum]	AT5G57560 | TCH4, XTH22 , Xyloglucan endotransglucosylase/hydrolase family protein	C5
FtPinG0004870600.01	25.4975	26.351	24.0252	702.807	669.855	234.961	142.484	330.807	790.521	129.703	596.221	131.932	XP_021671632.1|LOW QUALITY PROTEIN: low-temperature-induced 65 kDa protein [Hevea brasiliensis]	AT5G52300 | RD29B, LTI65 , CAP160 protein	C5
FtPinG0003555800.01	25.4975	6.081	17.0178	240.302	139.355	45.2589	72.2313	127.398	110.801	32.1959	87.5099	34.3687	-	-	C5
FtPinG0007103500.01	25.4975	18.243	16.0168	216.171	305.631	90.5178	88.0629	50.317	85.2314	35.8754	15.3864	21.0647	XP_010688158.1|PREDICTED: strigolactone esterase RMS3 [Beta vulgaris subsp. vulgaris]	AT3G24420 | alpha/beta-Hydrolases superfamily protein	C5
FtPinG0003955500.01	23.4577	36.486	31.0325	81.4411	61.7597	40.4441	111.81	108.128	74.5775	48.7538	50.0057	55.4334	XP_022754190.1|uncharacterized protein LOC111302633 [Durio zibethinus]	-	C5
FtPinG0002959500.01	23.4577	34.459	26.0273	86.4684	32.4634	24.0739	38.5893	86.7165	107.605	25.7567	66.3537	15.5214	XP_017258401.1|PREDICTED: uncharacterized protein LOC108227641 [Daucus carota subsp. sativus]	AT5G19855 | Chaperonin-like RbcX protein	C5
FtPinG0002323700.01	22.4378	63.8505	38.0399	30.1634	181.32	345.701	270.125	368.278	518.846	148.101	64.4304	44.3468	XP_021716338.1|cationic peroxidase 2-like [Chenopodium quinoa]	AT5G17820 | Peroxidase superfamily protein	C5
FtPinG0008935500.01	22.4378	13.1755	29.0304	54.2941	43.5485	39.4812	49.4735	51.3876	62.8582	45.9941	63.4687	23.282	AGW51410.1|pyrroline-5-carboxylate synthetase [Salicornia bigelovii]	AT3G55610 | P5CS2 , delta 1-pyrroline-5-carboxylate synthase 2	C5
FtPinG0008312700.01	22.4378	24.324	12.0126	53.2887	40.3813	40.4441	39.5788	83.5048	67.1197	48.7538	57.6988	27.7167	OAY83987.1|Glycerophosphodiester phosphodiesterase GDPD1, chloroplastic [Ananas comosus]	AT5G41080 | PLC-like phosphodiesterases superfamily protein	C5
FtPinG0002001500.01	20.398	19.2565	7.00734	119.648	72.8448	33.7034	41.5577	141.316	86.2968	45.0742	75.9701	21.0647	XP_018826675.1|PREDICTED: uncharacterized protein LOC108995550 [Juglans regia]	-	C5
FtPinG0000391000.01	19.3781	14.189	20.021	151.822	125.895	39.4812	78.1681	112.41	100.147	29.4362	50.9673	34.3687	XP_021754363.1|UDP-glucose 4-epimerase GEPI48-like [Chenopodium quinoa]	AT4G10960 | UGE5 , UDP-D-glucose/UDP-D-galactose 4-epimerase 5	C5
FtPinG0009234500.01	19.3781	9.12151	13.0136	101.55	71.2612	25.9998	72.2313	80.2931	61.7928	33.1158	27.8878	41.0208	ACQ41893.1|cinnamoyl-CoA reductase [Camellia oleifera]	AT5G58490 | NAD(P)-binding Rossmann-fold superfamily protein	C5
FtPinG0006064600.01	18.3582	21.2835	42.044	650.524	285.837	97.2585	194.926	265.502	257.825	133.383	221.179	82.0415	XP_022892059.1|HVA22-like protein e [Olea europaea var. sylvestris]	AT5G50720 | ATHVA22E, HVA22E , HVA22 homologue E	C5
FtPinG0001319300.01	17.3383	12.162	22.0231	62.3377	68.8858	39.4812	61.3472	86.7165	66.0544	45.0742	31.7344	37.6947	XP_002534286.1|probable mannitol dehydrogenase [Ricinus communis]	AT4G37980 | ELI3-1, ELI3, ATCAD7, CAD7 , elicitor-activated gene 3-1	C5
FtPinG0003981600.01	16.3184	29.3915	23.0241	247.34	136.188	84.74	49.4735	85.6459	160.874	22.9971	47.1207	7.76068	AXO59800.1|sucrose non-fermenting-1-related protein kinase 2.4 [Camellia sinensis]	AT1G60940 | SNRK2-10, SNRK2.10, SRK2B , SNF1-related protein kinase 2.10	C5
FtPinG0005801500.01	16.3184	13.1755	12.0126	97.5283	43.5485	32.7405	43.5367	54.5993	59.662	45.0742	38.4659	43.2381	XP_015087517.1|PREDICTED: transcription factor HBP-1b(c38)-like [Solanum pennellii]	AT1G58330 | ZW2 , transcription factor-related	C5
FtPinG0003555600.01	16.3184	15.2025	3.00315	133.724	93.4314	22.148	46.5051	100.634	139.566	18.3976	60.5838	21.0647	XP_016746139.1|PREDICTED: ninja-family protein AFP3-like [Gossypium hirsutum]	AT3G07250 | nuclear transport factor 2 (NTF2) family protein / RNA recognition motif (RRM)-containing protein	C5
FtPinG0006769900.01	15.2985	16.216	26.0273	57.3104	82.3463	24.0739	65.305	104.916	134.239	32.1959	10.5781	28.8254	RID61655.1|hypothetical protein BRARA_E00788 [Brassica rapa]	AT2G37170 | PIP2B, PIP2;2 , plasma membrane intrinsic protein 2	C5
FtPinG0008372400.01	15.2985	26.351	25.0262	170.926	44.3403	54.8884	18.7999	37.4701	92.6892	35.8754	57.6988	6.65201	XP_021754262.1|protein LURP-one-related 17-like [Chenopodium quinoa]	AT5G41590 | Protein of unknown function (DUF567)	C5
FtPinG0004037500.01	15.2985	31.4185	18.0189	223.209	148.065	47.1848	28.6946	77.0813	73.5121	35.8754	65.392	37.6947	XP_010666030.1|PREDICTED: LOB domain-containing protein 1 [Beta vulgaris subsp. vulgaris]	AT1G07900 | LBD1 , LOB domain-containing protein 1	C5
FtPinG0006640200.01	13.2587	13.1755	11.0115	10.0545	86.3052	57.7773	50.463	25.6938	126.782	39.5549	23.0795	37.6947	XP_012079335.1|probable indole-3-acetic acid-amido synthetase GH3.1 [Jatropha curcas]	AT2G14960 | GH3.1 , Auxin-responsive GH3 family protein	C5
FtPinG0000339800.01	12.2388	9.12151	30.0315	851.613	551.087	114.592	188.989	516.017	692.505	157.3	703.926	70.9548	XP_021767182.1|uncharacterized protein LOC110731618 [Chenopodium quinoa]	AT1G72100 | late embryogenesis abundant domain-containing protein / LEA domain-containing protein	C5
FtPinG0000723600.01	12.2388	21.2835	13.0136	87.4738	42.7567	29.8516	26.7157	79.2225	193.901	23.9169	85.5866	32.1514	XP_027101869.1|oleosin 16.4 kDa-like [Coffea arabica]	AT3G01570 | Oleosin family protein	C5
FtPinG0007087100.01	12.2388	72.9721	12.0126	41.2233	76.0119	152.147	93.9997	147.739	207.752	72.6707	48.0824	36.5861	XP_022963195.1|uncharacterized protein LOC111463479 [Cucurbita moschata]	AT2G22880 | VQ motif-containing protein	C5
FtPinG0008810800.01	11.2189	22.297	15.0157	131.713	64.9269	56.8144	21.7683	150.951	106.539	43.2345	97.1264	43.2381	PON68783.1|B-box-type zinc finger [Parasponia andersonii]	AT4G15248 | B-box type zinc finger family protein	C5
FtPinG0002221900.01	11.2189	8.10801	9.00944	76.4139	36.4224	25.9998	7.91576	42.823	17.0463	5.51929	4.80824	1.10867	-	-	C5
FtPinG0003237300.01	11.2189	6.081	2.0021	111.605	53.8418	17.3332	13.8526	41.7524	79.9045	14.7181	110.589	13.304	XP_007206433.1|poly [ADP-ribose] polymerase 3 isoform X1 [Prunus persica]	AT5G22470 | NAD+ ADP-ribosyltransferases;NAD+ ADP-ribosyltransferases	C5
FtPinG0001374000.01	10.199	39.5265	10.0105	42.2287	168.652	216.665	203.831	338.301	324.945	73.5906	50.9673	58.7595	PON77376.1|SAM dependent carboxyl methyltransferase [Trema orientale]	AT5G38020 | S-adenosyl-L-methionine-dependent methyltransferases superfamily protein	C5
FtPinG0005880000.01	10.199	18.243	8.00839	13.0708	72.053	17.3332	53.4314	83.5048	62.8582	14.7181	9.61647	9.97802	XP_002532412.1|pathogenesis-related protein PR-1 [Ricinus communis]	AT4G25780 | CAP (Cysteine-rich secretory proteins, Antigen 5, and Pathogenesis-related 1 protein) superfamily protein	C5
FtPinG0007068700.01	9.1791	16.216	13.0136	67.3649	39.5896	15.4073	34.6315	68.5168	56.4658	40.4748	30.7727	25.4994	CDP07014.1|unnamed protein product [Coffea canephora]	AT2G27940 | RING/U-box superfamily protein	C5
FtPinG0003023300.01	9.1791	11.1485	8.00839	176.959	102.141	13.4814	36.6104	27.8349	17.0463	25.7567	47.1207	19.956	XP_010676304.1|PREDICTED: ethylene-responsive transcription factor ERF061 [Beta vulgaris subsp. vulgaris]	AT1G64380 | Integrase-type DNA-binding superfamily protein	C5
FtPinG0008991400.01	8.1592	19.2565	16.0168	191.035	132.229	29.8516	22.7578	62.0933	232.256	30.3561	113.474	47.6728	PON81386.1|cold-regulated protein [Trema orientale]	AT3G03341 | unknown protein; Has 30201 Blast hits to 17322 proteins in 780 species: Archae - 12; Bacteria - 1396; Metazoa - 17338; Fungi - 3422; Plants - 5037; Viruses - 0; Other Eukaryotes - 2996 (source: NCBI BLink).	C5
FtPinG0004437600.01	8.1592	11.1485	11.0115	8.04357	23.7537	46.2218	31.663	33.1878	50.0735	17.4778	0.961647	76.4982	XP_016677166.1|PREDICTED: expansin-A18-like [Gossypium hirsutum]	AT1G12560 | ATEXPA7, EXP7, ATEXP7, ATHEXP ALPHA 1.26, EXPA7 , expansin A7	C5
FtPinG0002173200.01	7.1393	7.09451	12.0126	137.746	152.816	54.8884	49.4735	81.3636	225.863	18.3976	117.321	16.63	XP_023910542.1|NAC domain-containing protein 72 [Quercus suber]	AT4G27410 | RD26, ANAC072 , NAC (No Apical Meristem) domain transcriptional regulator superfamily protein	C5
FtPinG0006352400.01	7.1393	2.027	11.0115	60.3268	36.4224	8.6666	22.7578	34.2584	39.4195	3.67953	27.8878	4.43468	XP_016565828.1|PREDICTED: uncharacterized protein LOC107864078 [Capsicum annuum]	-	C5
FtPinG0008722700.01	6.1194	2.027	3.00315	49.2669	24.5455	8.6666	14.8421	14.988	27.7002	4.59941	41.3508	4.43468	XP_010498001.1|PREDICTED: uncharacterized protein LOC104775776 [Camelina sativa]	AT1G16730 | UP6 , unknown protein 6	C5
FtPinG0000050100.01	5.0995	27.3645	12.0126	123.67	106.1	27.9257	38.5893	50.317	53.2696	41.3947	52.8906	42.1294	XP_003624175.1|seipin-1 [Medicago truncatula]	AT5G16460 | Putative adipose-regulatory protein (Seipin)	C5
FtPinG0003219100.01	5.0995	11.1485	11.0115	73.3976	53.05	70.2957	4.94735	67.4462	62.8582	11.0386	5.76988	13.304	XP_015388386.1|protein BPS1, chloroplastic-like [Citrus sinensis]	-	C5
FtPinG0008672200.01	5.0995	22.297	8.00839	73.3976	73.6366	21.185	72.2313	50.317	67.1197	38.6351	61.5454	46.5641	GAV87968.1|hypothetical protein CFOL_v3_31392 [Cephalotus follicularis]	AT5G46795 | MSP2 , microspore-specific promoter 2	C5
FtPinG0002025600.01	5.0995	31.4185	6.00629	92.5011	145.69	34.6664	39.5788	22.4821	126.782	20.2374	100.973	45.4554	XP_017255584.1|PREDICTED: cytokinin riboside 5'-monophosphate phosphoribohydrolase LOG3-like [Daucus carota subsp. sativus]	AT2G37210 | lysine decarboxylase family protein	C5
FtPinG0004343900.01	4.0796	12.162	16.0168	102.556	73.6366	43.333	33.642	89.9282	686.113	22.0772	175.02	65.4115	XP_013469424.1|membrane protein PM19L [Medicago truncatula]	AT1G04560 | AWPM-19-like family protein	C5
FtPinG0000068200.01	4.0796	8.10801	7.00734	31.1688	30.8799	14.4443	20.7789	27.8349	42.6157	15.638	26.9261	17.7387	XP_010654058.1|PREDICTED: uncharacterized protein LOC100257875 isoform X3 [Vitis vinifera]	AT1G19490 | Basic-leucine zipper (bZIP) transcription factor family protein	C5
FtPinG0003652500.01	4.0796	10.135	4.00419	1229.66	757.744	196.443	114.779	345.795	1682.26	115.905	994.343	62.0855	P20075.1|RecName: Full=Embryonic protein DC-8	AT3G53040 | late embryogenesis abundant protein, putative / LEA protein, putative	C5
FtPinG0009412200.01	4.0796	3.0405	4.00419	120.654	54.6336	22.148	11.8736	31.0467	42.6157	19.3175	47.1207	16.63	OMO70292.1|Carotenoid oxygenase [Corchorus capsularis]	AT1G30100 | NCED5, ATNCED5 , nine-cis-epoxycarotenoid dioxygenase 5	C5
FtPinG0001862300.01	4.0796	6.081	2.0021	6.03268	5.54254	14.4443	18.7999	21.4115	24.504	16.5579	1.92329	3.32601	XP_021769790.1|probable LRR receptor-like serine/threonine-protein kinase At1g06840 isoform X2 [Chenopodium quinoa]	AT1G06840 | Leucine-rich repeat protein kinase family protein	C5
FtPinG0006246100.01	2.0398	4.054	4.00419	115.626	56.2172	25.0368	7.91576	78.1519	149.155	16.5579	185.598	18.8474	XP_011099747.1|uncharacterized protein LOC105178088 [Sesamum indicum]	AT4G33467 | unknown protein; Has 25 Blast hits to 25 proteins in 9 species: Archae - 0; Bacteria - 0; Metazoa - 0; Fungi - 0; Plants - 25; Viruses - 0; Other Eukaryotes - 0 (source: NCBI BLink).	C5
FtPinG0000702400.01	2.0398	9.12151	3.00315	160.871	122.728	48.1478	31.663	61.0227	381.411	21.1573	281.763	38.8034	XP_021726227.1|late embryogenesis abundant protein D-29-like [Chenopodium quinoa]	AT4G21020 | Late embryogenesis abundant protein (LEA) family protein	C5
FtPinG0000738700.01	2.0398	3.0405	2.0021	266.443	55.4254	17.3332	24.7368	130.61	139.566	17.4778	88.4715	16.63	XP_024174792.1|uncharacterized protein LOC112180458 [Rosa chinensis]	AT5G07330 | unknown protein; FUNCTIONS IN: molecular_function unknown; INVOLVED IN: biological_process unknown; LOCATED IN: mitochondrion; BEST Arabidopsis thaliana protein match is: unknown protein (TAIR:AT1G63060.1); Has 1807 Blast hits to 1807 proteins in 277 species: Archae - 0; Bacteria - 0; Metazoa - 736; Fungi - 347; Plants - 385; Viruses - 0; Other Eukaryotes - 339 (source: NCBI BLink).	C5
FtPinG0006234500.01	2.0398	3.0405	2.0021	36.1961	25.3373	15.4073	13.8526	12.8469	9.58853	11.0386	25.0028	9.97802	ONK76863.1|uncharacterized protein A4U43_C02F640 [Asparagus officinalis]	AT2G29525 | AtIPCS3 , Arabidopsis Inositol phosphorylceramide synthase 3	C5
FtPinG0003580000.01	1.0199	4.054	0	383.075	239.913	13.4814	87.0734	185.209	274.871	40.4748	57.6988	24.3907	XP_020418998.1|bidirectional sugar transporter N3 [Prunus persica]	AT3G48740 | SWEET11, AtSWEET11 , Nodulin MtN3 family protein	C5
FtPinG0003707500.01	0	1.0135	2.0021	78.4248	24.5455	8.6666	15.8315	31.0467	61.7928	5.51929	53.8522	8.86935	OVA14451.1|hypothetical protein BVC80_1365g7 [Macleaya cordata]	AT4G31830 | unknown protein; Has 42 Blast hits to 42 proteins in 10 species: Archae - 0; Bacteria - 0; Metazoa - 0; Fungi - 0; Plants - 42; Viruses - 0; Other Eukaryotes - 0 (source: NCBI BLink).	C5
FtPinG0005768900.01	0	0	1.00105	29.1579	8.7097	6.74069	3.95788	12.8469	4.26157	0	0.961647	1.10867	-	-	C5
FtPinG0006556600.01	0	3.0405	1.00105	14.0762	22.9619	6.74069	5.93682	22.4821	38.3541	2.75965	81.74	1.10867	XP_002517957.1|xanthohumol 4-O-methyltransferase [Ricinus communis]	AT5G54160 | ATOMT1, OMT1 , O-methyltransferase 1	C5
FtPinG0009212200.01	0	2.027	1.00105	2.01089	2.37537	2.88887	9.8947	16.0586	30.8964	14.7181	25.9645	0	ADU55794.1|HSP18.1B [Citrullus lanatus]	AT1G53540 | HSP20-like chaperones superfamily protein	C5
FtPinG0006731100.01	2541.59	2794.22	2144.25	590.197	1108.51	1159.4	1336.77	1639.05	1617.27	1612.55	1239.56	2241.73	XP_010687921.1|PREDICTED: probable galactinol--sucrose galactosyltransferase 6 [Beta vulgaris subsp. vulgaris]	AT5G20250 | DIN10 , Raffinose synthase family protein	C6
FtPinG0009594600.01	1764.43	4126.98	1619.7	690.742	771.996	1214.29	2146.16	2647.53	1610.87	2664.9	652.958	1911.35	XP_002310458.1|isocitrate lyase [Populus trichocarpa]	AT3G21720 | ICL , isocitrate lyase	C6
FtPinG0000959400.01	1753.21	2899.63	1596.67	125.681	709.445	2016.43	811.366	1403.52	2713.56	1545.4	544.292	552.117	XP_012854468.1|PREDICTED: kirola-like [Erythranthe guttata]	AT1G70840 | MLP31 , MLP-like protein 31	C6
FtPinG0004004500.01	1612.46	1610.45	2684.81	784.248	1058.62	1175.77	902.397	1058.8	999.338	839.853	743.353	1204.01	XP_021766350.1|fasciclin-like arabinogalactan protein 2 [Chenopodium quinoa]	AT4G12730 | FLA2 , FASCICLIN-like arabinogalactan 2	C6
FtPinG0007720600.01	762.885	1434.1	1137.19	226.225	935.105	566.218	716.376	482.829	634.974	574.927	585.643	447.902	XP_017632821.1|PREDICTED: extensin-2-like [Gossypium arboreum]	-	C6
FtPinG0002802300.01	734.328	812.828	322.338	130.708	122.728	407.33	141.494	324.384	252.498	528.932	189.445	37.6947	PSS17806.1|BURP domain protein [Actinidia chinensis var. chinensis]	AT5G25610 | RD22, ATRD22 , BURP domain-containing protein	C6
FtPinG0003743200.01	594.602	1071.27	434.455	96.5228	205.074	341.849	108.842	270.855	430.419	589.645	164.442	236.146	XP_002533739.1|indole-3-acetic acid-amido synthetase GH3.6 [Ricinus communis]	AT4G27260 | GH3.5, WES1 , Auxin-responsive GH3 family protein	C6
FtPinG0002291100.01	567.065	269.591	708.742	148.806	452.905	242.665	210.757	230.173	229.059	149.021	296.187	298.232	XP_010686492.1|PREDICTED: uncharacterized protein LOC104900698 [Beta vulgaris subsp. vulgaris]	AT4G32480 | Protein of unknown function (DUF506)	C6
FtPinG0006479000.01	498.731	587.83	538.564	86.4684	254.957	263.85	175.136	191.633	258.89	206.974	145.209	425.729	XP_021660216.1|inositol oxygenase 1-like [Hevea brasiliensis]	AT1G14520 | MIOX1 , myo-inositol oxygenase 1	C6
FtPinG0001194000.01	493.632	883.773	1035.08	132.719	260.499	460.293	185.031	327.596	458.119	488.458	251.952	409.099	PON87964.1|FAS1 domain containing protein [Trema orientale]	AT4G12730 | FLA2 , FASCICLIN-like arabinogalactan 2	C6
FtPinG0000962800.01	440.597	630.397	321.337	25.1362	79.1791	285.035	85.0944	125.257	270.61	264.926	102.896	110.867	XP_010045029.2|PREDICTED: cinnamoyl-CoA reductase 1 [Eucalyptus grandis]	AT5G19440 | NAD(P)-binding Rossmann-fold superfamily protein	C6
FtPinG0005018900.01	398.781	521.953	664.696	125.681	479.825	422.737	327.515	196.986	251.433	228.131	315.42	288.254	XP_025644203.1|leucine-rich repeat extensin-like protein 4 [Arachis hypogaea]	AT3G24480 | Leucine-rich repeat (LRR) family protein	C6
FtPinG0002376300.01	364.104	464.183	504.529	45.2451	121.936	219.554	58.3787	64.2345	159.809	108.546	83.6633	135.258	XP_010106073.1|allene oxide synthase 1, chloroplastic [Morus notabilis]	AT5G42650 | AOS, CYP74A, DDE2 , allene oxide synthase	C6
FtPinG0003412000.01	355.945	513.845	282.296	30.1634	69.6776	338.96	82.126	186.28	300.441	264.926	120.206	90.9109	XP_021720179.1|cytochrome P450 71A3-like [Chenopodium quinoa]	AT3G48270 | CYP71A26 , cytochrome P450, family 71, subfamily A, polypeptide 26	C6
FtPinG0003090500.01	304.95	585.803	345.362	102.556	223.285	324.516	133.578	239.809	163.005	143.502	200.023	260.537	XP_015575420.1|serine carboxypeptidase-like 34 [Ricinus communis]	AT5G23210 | SCPL34 , serine carboxypeptidase-like 34	C6
FtPinG0003134600.01	304.95	365.874	286.3	116.632	118.769	202.221	110.821	231.244	223.732	264.006	174.058	170.735	XP_007211642.2|NAC domain-containing protein 21/22 [Prunus persica]	AT1G56010 | NAC1, ANAC022 , NAC domain containing protein 1	C6
FtPinG0004721800.01	290.672	196.619	307.322	56.305	210.616	167.554	163.263	107.057	125.716	112.226	173.097	180.713	XP_015062354.1|PREDICTED: light-inducible protein CPRF2 [Solanum pennellii]	AT5G28770 | BZO2H3, AtbZIP63 , bZIP transcription factor family protein	C6
FtPinG0006174300.01	279.453	470.264	404.424	103.561	116.393	224.369	261.22	260.15	308.964	241.009	473.13	243.907	ACH63213.1|wound-induced protein [Rheum australe]	AT4G10270 | Wound-responsive family protein	C6
FtPinG0002727000.01	267.214	650.668	474.497	108.588	171.027	306.22	166.231	178.786	196.032	195.015	205.793	221.734	XP_020206542.1|gibberellin-regulated protein 11-like [Cajanus cajan]	AT1G74670 | Gibberellin-regulated family protein	C6
FtPinG0007957700.01	265.174	346.617	270.283	17.0926	91.056	266.739	35.6209	88.8577	174.724	128.784	83.6633	106.432	XP_022896028.1|purple acid phosphatase 2-like [Olea europaea var. sylvestris]	AT2G16430 | PAP10, ATPAP10 , purple acid phosphatase 10	C6
FtPinG0008486500.01	261.094	162.16	291.305	41.2233	213.784	74.1475	142.484	83.5048	82.0352	46.914	145.209	50.9988	XP_021622172.1|glycerol-3-phosphate 2-O-acyltransferase 6-like [Manihot esculenta]	AT2G38110 | ATGPAT6, GPAT6 , glycerol-3-phosphate acyltransferase 6	C6
FtPinG0004106600.01	252.935	338.509	226.237	23.1253	112.434	240.739	218.673	230.173	323.879	193.175	99.0497	107.541	XP_021748051.1|uncharacterized protein C594.04c-like [Chenopodium quinoa]	AT2G46890 | Protein of unknown function (DUF1295)	C6
FtPinG0000357300.01	248.856	538.169	442.464	78.4248	167.86	376.515	101.915	132.751	264.217	275.045	83.6633	130.823	XP_023890267.1|uncharacterized protein LOC112002346 [Quercus suber]	AT3G18180 | Glycosyltransferase family 61 protein	C6
FtPinG0006410800.01	247.836	373.982	250.262	28.1525	90.2642	205.109	32.6525	61.0227	103.343	68.9912	41.3508	67.6288	XP_010661587.1|PREDICTED: geraniol 8-hydroxylase isoform X1 [Vitis vinifera]	AT2G45560 | CYP76C1 , cytochrome P450, family 76, subfamily C, polypeptide 1	C6
FtPinG0004447500.01	227.438	355.739	218.229	11.0599	113.226	195.48	38.5893	70.6579	158.744	127.864	53.8522	55.4334	XP_021728194.1|12-oxophytodienoate reductase 3-like [Chenopodium quinoa]	AT2G06050 | OPR3, DDE1 , oxophytodienoate-reductase 3	C6
FtPinG0007824100.01	226.418	47.6345	71.0745	3.01634	7.91791	34.6664	30.6736	41.7524	194.967	59.7924	54.8139	15.5214	PON71945.1|Peroxidase [Parasponia andersonii]	AT3G21770 | Peroxidase superfamily protein	C6
FtPinG0003282600.01	220.298	121.62	48.0503	10.0545	34.8388	20.2221	37.5999	155.233	145.959	180.297	97.1264	19.956	AMN14865.1|putative peroxidase N [Nepenthes mirabilis]	AT5G19890 | Peroxidase superfamily protein	C6
FtPinG0004960100.01	219.279	119.593	162.17	36.1961	85.5134	51.9996	70.2524	87.7871	66.0544	69.9111	63.4687	62.0855	XP_010676545.1|PREDICTED: F-box protein PP2-A12 [Beta vulgaris subsp. vulgaris]	AT1G12710 | AtPP2-A12, PP2-A12 , phloem protein 2-A12	C6
FtPinG0009066900.01	192.761	356.752	185.194	5.02723	31.6716	112.666	10.8842	31.0467	74.5775	43.2345	26.9261	28.8254	XP_010261086.1|PREDICTED: alkane hydroxylase MAH1-like [Nelumbo nucifera]	AT2G23180 | CYP96A1 , cytochrome P450, family 96, subfamily A, polypeptide 1	C6
FtPinG0001429000.01	187.662	136.823	142.149	44.2396	87.8888	116.518	120.715	74.9402	96.9507	64.3918	81.74	70.9548	XP_010665649.1|PREDICTED: subtilisin-like protease SBT5.6 [Beta vulgaris subsp. vulgaris]	AT5G45650 | subtilase family protein	C6
FtPinG0003198000.01	181.542	280.74	219.23	55.2995	71.2612	140.591	127.642	163.798	188.575	210.653	108.666	83.1502	XP_021849070.1|UDP-glucuronate:xylan alpha-glucuronosyltransferase 2-like isoform X2 [Spinacia oleracea]	AT4G33330 | PGSIP3, GUX2 , plant glycogenin-like starch initiation protein 3	C6
FtPinG0002078000.01	178.483	175.336	158.166	99.5392	93.4314	80.8882	67.284	126.328	95.8853	73.5906	81.74	88.6935	XP_021894730.1|uncharacterized protein LOC110812299 [Carica papaya]	AT5G54530 | Protein of unknown function, DUF538	C6
FtPinG0003445800.01	159.104	174.322	191.2	25.1362	72.8448	103.999	62.3366	107.057	66.0544	112.226	57.6988	79.8242	PIN03741.1|putative transporter (major facilitator superfamily) [Handroanthus impetiginosus]	AT5G18840 | Major facilitator superfamily protein	C6
FtPinG0000926400.01	151.965	90.2016	91.0954	44.2396	42.7567	42.37	150.399	84.5754	58.5966	86.469	159.633	67.6288	XP_011079624.1|ethylene-responsive transcription factor ERF071 [Sesamum indicum]	AT2G47520 | HRE2 , Integrase-type DNA-binding superfamily protein	C6
FtPinG0001611700.01	133.607	123.647	144.151	57.3104	61.7597	77.9994	122.694	101.705	123.586	104.867	73.0852	94.2369	PWA43310.1|Leucine-rich repeat-containing protein [Artemisia annua]	AT2G15320 | Leucine-rich repeat (LRR) family protein	C6
FtPinG0008178200.01	116.269	143.917	141.148	25.1362	28.5045	121.332	50.463	47.1053	95.8853	84.6292	35.5809	28.8254	XP_021767879.1|short-chain dehydrogenase TIC 32, chloroplastic-like [Chenopodium quinoa]	AT4G24050 | NAD(P)-binding Rossmann-fold superfamily protein	C6
FtPinG0006173900.01	115.249	131.755	195.204	38.207	61.7597	78.9623	105.873	96.3517	115.062	84.6292	133.669	89.8022	ACH63213.1|wound-induced protein [Rheum australe]	AT4G10265 | Wound-responsive family protein	C6
FtPinG0007804900.01	107.09	148.985	154.162	18.098	38.006	85.703	48.484	72.7991	41.5503	78.19	28.8494	23.282	XP_010674988.1|PREDICTED: sugar transporter ERD6-like 5 [Beta vulgaris subsp. vulgaris]	AT1G54730 | Major facilitator superfamily protein	C6
FtPinG0000408900.01	87.7114	110.472	139.146	10.0545	72.8448	96.2955	62.3366	39.6112	42.6157	45.0742	49.044	56.5421	XP_010679361.1|PREDICTED: probable beta-D-xylosidase 2 [Beta vulgaris subsp. vulgaris]	AT1G02640 | BXL2, ATBXL2 , beta-xylosidase 2	C6
FtPinG0002474100.01	83.6318	89.1881	62.065	28.1525	39.5896	47.1848	31.663	29.9761	51.1389	36.7953	31.7344	37.6947	XP_002511471.1|two-component response regulator ARR5 [Ricinus communis]	AT3G48100 | ARR5, ATRR2, IBC6, RR5 , response regulator 5	C6
FtPinG0007019700.01	76.4925	78.0396	80.0839	10.0545	28.5045	88.5919	23.7473	50.317	58.5966	51.5134	22.1179	23.282	XP_021730474.1|transcription factor LAF1-like [Chenopodium quinoa]	AT4G25560 | AtMYB18, MYB18 , myb domain protein 18	C6
FtPinG0007251500.01	67.3134	84.1206	60.0629	13.0708	25.3373	53.9255	26.7157	25.6938	26.6348	43.2345	21.1562	15.5214	ASM90225.1|potassium channel AKT1 [Sesuvium portulacastrum]	AT2G26650 | AKT1, ATAKT1, KT1 , K+ transporter 1	C6
FtPinG0005693400.01	65.2736	105.404	60.0629	1.00545	69.6776	77.9994	180.084	6.42345	36.2234	12.8784	38.4659	26.6081	-	-	C6
FtPinG0004052700.01	57.1144	109.458	86.0902	10.0545	54.6336	64.518	44.5262	25.6938	61.7928	37.7152	34.6193	35.4774	XP_022738282.1|protein TPX2 [Durio zibethinus]	AT1G03780 | TPX2 , targeting protein for XKLP2	C6
FtPinG0001364900.01	48.9552	72.9721	83.087	6.03268	19.7948	52.9625	41.5577	37.4701	63.9236	36.7953	15.3864	28.8254	XP_021617822.1|protein trichome birefringence-like 33 [Manihot esculenta]	AT2G40320 | TBL33 , TRICHOME BIREFRINGENCE-LIKE 33	C6
FtPinG0003029000.01	43.8557	65.8776	40.0419	1.00545	19.7948	37.5552	23.7473	8.56459	36.2234	16.5579	5.76988	25.4994	-	-	C6
FtPinG0002337200.01	41.8159	33.4455	51.0535	6.03268	12.6687	5.77773	20.7789	14.988	10.6539	3.67953	12.5014	18.8474	PSR95796.1|Thioredoxin-like [Actinidia chinensis var. chinensis]	AT5G61440 | ACHT5 , atypical CYS HIS rich thioredoxin 5	C6
FtPinG0003037700.01	37.7363	54.729	77.0808	11.0599	19.003	55.8514	14.8421	23.5526	20.2425	25.7567	23.0795	14.4127	XP_002267923.1|PREDICTED: protein DETOXIFICATION 24 [Vitis vinifera]	AT5G17700 | MATE efflux family protein	C6
FtPinG0004163700.01	35.6965	65.8776	61.064	4.02179	19.7948	28.8887	8.90523	13.9175	26.6348	15.638	4.80824	15.5214	XP_010672446.1|PREDICTED: (+)-neomenthol dehydrogenase isoform X2 [Beta vulgaris subsp. vulgaris]	AT3G59710 | NAD(P)-binding Rossmann-fold superfamily protein	C6
FtPinG0001340100.01	35.6965	38.513	14.0147	0	6.33433	27.9257	2.96841	4.2823	13.8501	2.75965	10.5781	1.10867	XP_009359395.1|PREDICTED: 11-beta-hydroxysteroid dehydrogenase 1B-like isoform X1 [Pyrus x bretschneideri]	AT5G50700 | HSD1 , hydroxysteroid dehydrogenase 1	C6
FtPinG0009698600.01	34.6766	50.675	38.0399	2.01089	5.54254	30.8146	15.8315	11.7763	13.8501	18.3976	7.69318	15.5214	XP_012460026.1|PREDICTED: two-component response regulator ARR8-like [Gossypium raimondii]	AT3G57040 | ARR9, ATRR4 , response regulator 9	C6
FtPinG0008193300.01	33.6567	44.594	16.0168	1.00545	7.12612	19.2591	5.93682	4.2823	19.1771	11.9585	2.88494	6.65201	XP_020237208.1|probable glycosyltransferase At3g42180 [Cajanus cajan]	AT5G20260 | Exostosin family protein	C6
FtPinG0004263000.01	31.6169	41.5535	27.0283	10.0545	8.7097	6.74069	12.8631	24.6232	27.7002	32.1959	25.9645	34.3687	XP_021714870.1|probable glycosyltransferase At3g07620 [Chenopodium quinoa]	AT5G25820 | Exostosin family protein	C6
FtPinG0009145200.01	28.5572	15.2025	26.0273	0	9.50149	8.6666	1.97894	9.63517	3.19618	6.43918	0.961647	1.10867	XP_011016204.1|PREDICTED: ABC transporter B family member 21-like [Populus euphratica]	AT1G02520 | PGP11 , P-glycoprotein 11	C6
FtPinG0002673900.01	27.5373	65.8776	60.0629	5.02723	15.8358	42.37	13.8526	19.2703	18.1117	27.5965	10.5781	8.86935	XP_008359473.1|PREDICTED: feruloyl CoA ortho-hydroxylase 1-like [Malus domestica]	AT3G13610 | 2-oxoglutarate (2OG) and Fe(II)-dependent oxygenase superfamily protein	C6
FtPinG0001010700.01	23.4577	28.378	40.0419	2.01089	7.91791	25.9998	6.92629	9.63517	13.8501	12.8784	8.65483	4.43468	XP_008244799.1|PREDICTED: CASP-like protein 4B1 [Prunus mume]	AT2G38480 | Uncharacterised protein family (UPF0497)	C6
FtPinG0004039900.01	18.3582	25.3375	28.0294	3.01634	0.791791	10.5925	0.98947	6.42345	6.39236	2.75965	9.61647	6.65201	XP_017976798.1|PREDICTED: pleiotropic drug resistance protein 3 [Theobroma cacao]	AT3G53480 | PIS1, PDR9, ATPDR9, ABCG37 , pleiotropic drug resistance 9	C6
